# Supplementary material for: Diastereoselective tandem oxidation/Michael/aldol reaction: unprecedented formation of dispirocyclopentanebisoxindoles and dispiro[acenaphthylene-1,1′-cyclopentane-3′,1′′-acenaphthylene]-2,2′′diones
Source: Royal Society of Chemistry journal article supplement (doi:10.1039/c6ob02607a), 2017-01-01

**Diastereoselective tandem oxidation/Michael/aldol reaction:  
Unprecedented formation of dispirocyclopentanebisoxindoles and  
dispiro[acenaphthylene-1,1'-cyclopentane-3',1''-acenaphthylene]-  
2,2''diones**

**Koorathota Suman<sup>‡</sup>, Mala Ramanjaneyulu<sup>§,‡</sup> and Sathiah Thennarasu<sup>\*,§,‡</sup>**

<sup>‡</sup>*Organic & Bioorganic Chemistry Laboratory, CSIR-Central Leather Research Institute  
Adyar, Chennai-600020, India*

<sup>§</sup>*Academy of Scientific and Innovative Research (AcSIR), Anusandhan Bahavan, 2 Rafi Marg,  
New Delhi-110001, India*

*E-mail: thennarasu@gmail.com*

**Contents**

Table of contents

|                                                                                   |     |
|-----------------------------------------------------------------------------------|-----|
| 1. General methods and Procedure for the synthesis of <b>2a-l</b> and <b>4a-d</b> | S2  |
| 2. Data used for characterization of products                                     | S3  |
| 3. <sup>1</sup> H, <sup>13</sup> C and DEPT-135 NMR spectra                       | S11 |
| 4. HRMS Spectra of compounds                                                      | S35 |
| 5. Crystal data and structure refinement                                          | S43 |

## General methods

All the reagents were purchased from Sigma-Aldrich and used without further purification. Pre-coated plates (Merck, silica gel 60 GF<sub>254</sub>, 0.25 mm) were used for TLC analysis. The <sup>1</sup>H and <sup>13</sup>C NMR spectra were recorded on Bruker Avance 400 MHz Spectrometer. The DEPT-135 experiments were carried out on Bruker Avance 400 MHz Spectrometer. Mass spectra were recorded under EI/HRMS at 60,000 resolution using Thermo Scientific Exactive mass spectrometer. The <sup>1</sup>H and <sup>13</sup>C chemical shift values ( $\delta$ ) are given in ppm with reference to TMS as internal standard (zero ppm). Coupling constants are given in Hertz.

### General Procedure:

In an oven dried 50-mL round-bottom flask 1.0 mmol 3-phenacyloxindole/phenacylacenaphthylene, 10 mL ethanol and 15 mol % DIPEA were taken and the contents of the flask were heated under reflux ~80 °C until the starting materials were consumed. The reaction mixture was allowed to cool to room temperature. The crude product was separated by filtration, washed with 10-15 mL of ethanol to obtain pure white solid that did not require further purification.

**2'-benzoyl-1,1''-dibenzyl-5'-hydroxy-5'-phenyl-1,1'',2,2''-tetrahydrodispiro[indole-3,1'-cyclopentane-3',3''-indole]-2,2''-dione (2a):** The title compound was prepared according to the

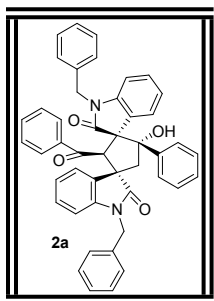

general procedure as a white solid in 78 % yield; mp = 248-250 °C; IR (KBr): 3307, 3064, 3025, 2922, 1709, 1686, 1609, 1493, 1470, 1389, 1351, 1301, 1231, 1181, 1100, 1012, 931, 862, 804, 758, 696, 604, 554, 457 cm<sup>-1</sup>; <sup>1</sup>H NMR (400 MHz, CDCl<sub>3</sub>) δ 8.21 (d, *J* = 7.4 Hz, 1H), 7.97 (d, *J* = 6.8 Hz, 1H), 7.37 – 7.21 (m, 9H), 7.19 – 7.06 (m, 10H), 7.01 (t, *J* = 9.5 Hz, 3H), 6.94 (t, *J* = 7.7 Hz, 1H), 6.53 (d, *J* = 7.2 Hz, 2H), 6.40 (d, *J* = 7.5 Hz, 1H), 6.30 (d, *J* = 7.8 Hz, 1H), 5.38 (s, 1H), 5.24 (d, *J* = 15.3 Hz, 1H), 5.17 (d, *J* = 16.1 Hz, 1H), 4.51 (d, *J* = 14.9 Hz, 1H), 4.47 (d, *J* = 16.8 Hz, 1H), 4.26 (d, *J* = 15.3 Hz, 1H), 2.57 (d, *J* = 13.9 Hz, 1H). <sup>13</sup>C NMR (100 MHz, CDCl<sub>3</sub>) δ 196.46, 183.88, 176.83, 143.79, 137.11, 135.71, 134.88, 132.29, 128.98, 128.67, 128.52, 128.33, 128.04, 127.83, 127.75, 127.65, 127.08, 126.81, 126.39, 126.10, 125.73, 124.26, 121.93, 108.78, 108.52, 84.55, 66.62, 65.29, 54.28, 46.70, 44.53, 43.80. HRMS Calcd for [C<sub>46</sub>H<sub>36</sub>N<sub>2</sub>O<sub>4</sub>+Na]: 703.25728; found: 703.25772.

**1,1''-dibenzyl-2'-(4-bromobenzoyl)-5'-(4-bromophenyl)-5'-hydroxy-1,1'',2,2''-tetrahydrodispiro[indole-3,3'-cyclopentane-1',3''-indole]-2,2''-dione (2b) :** The title

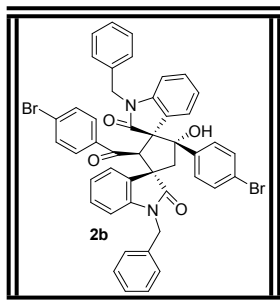

compound was prepared according to the general procedure as a white solid in 73 % yield; mp = 234-236 °C; IR (KBr): 3318, 3068, 2933, 1689, 1605, 1489, 1431, 1343, 1231, 1085, 996, 915, 815, 750, 696, 577, 465 cm<sup>-1</sup>; <sup>1</sup>H NMR (400 MHz, CDCl<sub>3</sub>) δ 8.15 (d, *J* = 8.1 Hz, 1H), 7.92 (d, *J* = 7.3 Hz, 1H), 7.37 (dt, *J* = 11.1, 7.3 Hz, 5H), 7.23 (dd, *J* = 14.7, 7.8 Hz, 5H), 7.14 (t, *J* = 7.5 Hz, 1H), 7.10 – 7.05 (m, 1H), 7.05 – 6.99 (m, 6H), 6.99 – 6.93 (m, 3H), 6.60 (d, *J* = 7.0 Hz, 2H), 6.46 (t, *J* = 6.1 Hz, 2H), 5.25 (s, 1H), 5.22 (d, *J* = 16.3 Hz, 1H), 5.08 (d, *J* = 15.1 Hz, 1H), 4.50 (d, *J* = 15.3 Hz, 1H), 4.46 (d, *J* = 15.8 Hz, 1H), 4.42 (d, *J* = 13.5 Hz, 1H), 2.53 (d, *J* = 13.9 Hz, 1H). <sup>13</sup>C NMR (100 MHz, CDCl<sub>3</sub>) δ 195.28, 183.61, 176.59, 143.71, 141.58, 137.34, 135.61, 135.45, 134.67, 131.07, 130.78, 130.03, 129.13, 128.91, 128.64, 128.38, 128.25, 128.07, 128.00, 127.35, 127.11, 126.99, 126.37, 126.11, 125.74, 124.35, 122.14, 122.04, 108.89, 108.62, 84.01, 66.53, 65.01, 54.08, 46.76, 44.79, 43.91. HRMS (EI) Calcd for [C<sub>46</sub>H<sub>34</sub>Br<sub>2</sub>N<sub>2</sub>O<sub>4</sub>+Na]: 859.07830; found: 859.07831

**1,1''-dibenzyl-5'-hydroxy-2'-(4-phenylbenzoyl)-5''-(4-phenylphenyl)-1,1'',2,2''-**

**tetrahydrodispiro[indole-3,3'-cyclopentane-1',3''-indole]-2,2''-dione (2c)** : The title compound

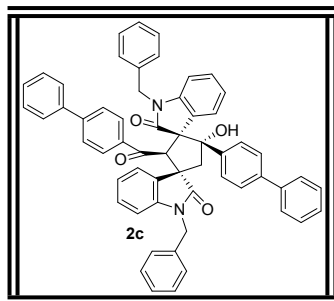

was prepared according to the general procedure as a white solid in 70 % yield; mp = 240-242 °C; IR (KBr): 3287, 3060, 2902, 1709, 1686, 1609, 1585, 1482, 1428, 1352, 1274, 1239, 1104, 1096, 1070, 1000, 846, 811, 731, 692, 573, 554, 534, 453 cm<sup>-1</sup>; <sup>1</sup>H NMR (400 MHz, CDCl<sub>3</sub>) δ 8.25 (d, J = 7.5 Hz, 1H), 8.02 (d, J = 7.3 Hz, 1H), 7.57 (d, J = 7.6 Hz, 2H), 7.46(d, J=4.0 Hz, 4H), 7.41 (d, J=7.3Hz, 4H), 7.35 (d, J = 7.6 Hz, 1H), 7.33–7.21 (m, 10H), 7.19 (d, J = 8.3 Hz, 2H), 7.15 – 7.10 (m, 2H), 7.05 (s, 2H), 6.98–6.94 (dd, J = 9.9, 7.4 Hz, 4H), 6.59 (d, J = 7.0 Hz, 2H), 6.43 (d, J = 7.2 Hz, 1H), 6.34 (d, J = 7.7 Hz, 1H), 5.42 (s, 1H), 5.23 (dd, J = 23.1, 15.7 Hz, 2H), 4.56 (d, J = 13.9 Hz, 1H), 4.47 (d, J = 16.1 Hz, 1H), 4.36 (d, J = 15.2 Hz, 1H), 2.61 (d, J = 13.9 Hz, 1H); <sup>13</sup>C NMR (100 MHz, CDCl<sub>3</sub>) δ 195.97, 183.96, 176.95, 144.92, 143.92, 141.72, 140.54, 140.28, 139.59, 137.55, 135.80, 135.69, 134.89, 130.49, 128.99 (2C), 128.94 (2C), 128.80, 128.74, 128.51 (2C), 128.39, 128.29, 128.09, 127.83 (2C), 127.67, 127.35, 127.31, 127.13 (2C), 127.04 (2C), 126.84, 126.68, 126.39 (2C), 126.24, 125.82, 124.31, 121.97, 108.88, 108.51, 84.44, 66.75, 65.44, 54.42, 47.04, 44.72, 43.97; HRMS (EI) Calcd for [C<sub>58</sub>H<sub>44</sub>N<sub>2</sub>O<sub>4</sub>+Na]: 855.31988; found: 855.32002.

**2'-benzoyl-1,1''-dibenzyl-5,5''-difluoro-5'-hydroxy-5''-phenyl-1,1'',2,2''-**

**tetrahydrodispiro[indole-3,1'-cyclopentane-3',3''-indole]-2,2''-dione (2d)** : The title

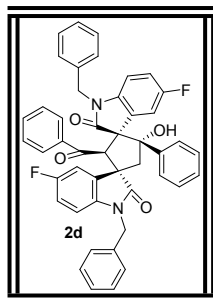

compound was prepared according to the general procedure as a white solid in 71 % yield; mp = 244-246 °C; IR (KBr): 3245, 3056, 2914, 1695, 1635, 1534, 1475, 1421, 1563, 1275, 1225, 1100, 821, 715, 689, 570, 545 cm<sup>-1</sup>; <sup>1</sup>H NMR (400 MHz, CDCl<sub>3</sub>) δ 8.07 (d, J = 6.8 Hz, 1H), 7.73 (d, J = 6.5 Hz, 1H), 7.31 (m, 8H), 7.16 (m 8H), 7.04 (t, J = 7.6 Hz, 2H), 6.96 (s, 1H), 6.83 (t, J = 7.8 Hz, 1H), 6.65 (t, J = 7.7 Hz, 1H), 6.50 (d, J = 7.0 Hz, 2H), 6.30 (dd, J = 8.2, 4.2 Hz, 1H), 6.22 (dd, J = 8.5, 3.9 Hz, 1H), 5.30 (s, 1H), 5.25 (d, J = 15.4 Hz, 1H), 5.18 (d, J = 16.2 Hz, 1H), 4.47 (d, J = 2.0 Hz, 1H), 4.43 (d, J = 5.2 Hz, 1H), 4.23 (d, J = 15.4 Hz, 1H), 2.57 (d, J = 14.0 Hz, 1H). <sup>13</sup>C NMR (100 MHz, CDCl<sub>3</sub>) δ 196.08, 183.51, 176.56, 161.27, 159.92, 158.86, 157.55, 139.75, 137.78, 137.54, 136.84, 135.30, 134.48, 132.59, 131.91, 129.07, 128.59, 128.20, 128.01, 127.95, 127.87, 127.62, 127.09, 126.97, 126.33, 126.02, 115.30, 115.13, 114.98, 114.89, 114.74,

113.94, 113.69, 109.22, 84.50, 66.99, 65.33, 54.51, 46.56, 44.70, 43.94, 29.70. HRMS (EI) Calcd for  $[C_{46}H_{34}F_2N_2O_4+Na]$ : 739.23843; found: 739.23888.

**2'-benzoyl-1,1''-dibenzyl-5'-hydroxy-5,5''-dimethyl-5'-phenyl-1,1'',2,2''-**

**tetrahydrodispiro[indole-3,1'-cyclopentane-3',3''-indole]-2,2''-dione (2e)** : The title compound

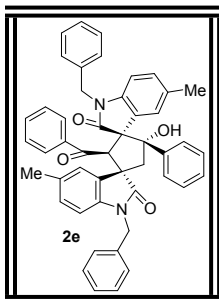

was prepared according to the general procedure as a white solid in 76 % yield; mp = 255-257 °C; IR (KBr): 3349, 3129, 2929, 2852, 1705, 1682, 1609, 1497, 1381, 1347, 1197, 1004, 811, 758, 696, 554  $cm^{-1}$ ;  $^1H$  NMR (400 MHz,  $CDCl_3$ )  $\delta$  8.02 (s, 1H), 7.78 (s, 1H), 7.34 – 7.22 (m, 7H), 7.18 – 7.05 (m, 10H), 7.01 (t,  $J = 7.6$  Hz, 2H), 6.92 (d,  $J = 7.8$  Hz, 1H), 6.74 (d,  $J = 7.8$  Hz, 1H), 6.46 (d,  $J = 7.0$  Hz, 2H), 6.29 (d,  $J = 7.9$  Hz, 1H), 6.18 (d,  $J = 7.9$  Hz, 1H),

5.34 (s, 1H), 5.23 (d,  $J = 15.0$  Hz, 2H), 4.50 (d,  $J = 13.8$  Hz, 1H), 4.41 (d,  $J = 16.2$  Hz, 1H), 4.23 (d,  $J = 15.3$  Hz, 1H), 2.56 (d,  $J = 13.9$  Hz, 1H), 2.38 (s, 3H), 2.30 (s, 3H).  $^{13}C$  NMR (100 MHz,  $CDCl_3$ )  $\delta$  196.59, 183.79, 176.77, 141.47, 139.21, 138.48, 137.32, 135.84, 134.97, 134.00, 132.14, 131.25, 130.43, 129.02, 128.95, 128.53, 128.47, 127.98, 127.78, 127.72, 127.63, 127.54, 127.08, 126.73, 126.53, 126.34, 126.13, 108.43, 108.28, 84.51, 66.60, 65.45, 54.34, 46.74, 44.52, 43.88, 21.32, 21.30. HRMS (EI) Calcd for  $[C_{48}H_{40}N_2O_4+Na]$ : 731.28858; found: 731.28961.

**2'-benzoyl-1,1''-dibenzyl-5,5''-dichloro-5'-hydroxy-5'-phenyl-1,1'',2,2''-**

**tetrahydrodispiro[indole-3,1'-cyclopentane-3',3''-indole]-2,2''-dione (2f)** : The title compound

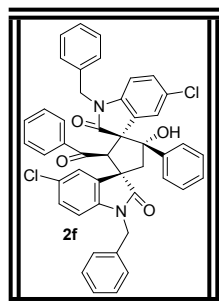

was prepared according to the general procedure as a white solid in 68 % yield; mp = 250-252 °C; IR (KBr): 3310, 3068, 2933, 1697, 1609, 1485, 1431, 1343, 1181, 1081, 992, 915, 815, 750, 700, 619, 580, 554  $cm^{-1}$ ;  $^1H$  NMR (400 MHz,  $CDCl_3$ )  $\delta$  8.24 (s, 1H), 7.95 (s, 1H), 7.32 (t,  $J = 8.6$  Hz, 3H), 7.29 – 7.23 (m, 3H), 7.22 – 7.15 (m, 7H), 7.10 (t,  $J = 7.7$  Hz, 4H), 7.03 (t,  $J = 7.5$  Hz, 2H), 6.93 (d,  $J = 8.4$  Hz, 1H), 6.90 (s, 1H), 6.47 (d,  $J = 7.3$  Hz, 2H), 6.30 (d,  $J = 8.3$  Hz,

1H), 6.22 (d,  $J = 8.4$  Hz, 1H), 5.28 (s, 1H), 5.24 (d,  $J = 8.4$  Hz, 1H), 5.20 (d,  $J = 9.2$  Hz, 1H), 4.46 (d,  $J = 4.4$  Hz, 1H), 4.42 (d,  $J = 6.8$  Hz, 1H), 4.24 (d,  $J = 15.3$  Hz, 1H), 2.55 (d,  $J = 14.0$  Hz, 1H).  $^{13}C$  NMR (100 MHz,  $CDCl_3$ )  $\delta$  196.08, 183.38, 176.36, 142.44, 140.15, 137.75, 136.92, 135.16, 134.35, 132.53, 131.96, 129.79, 129.09, 128.70, 128.60, 128.46, 128.29, 128.26, 128.02, 127.98, 127.91, 127.64, 127.27, 127.08, 126.99, 126.29, 126.05, 109.76, 109.54, 84.48, 66.82, 65.49, 54.30, 46.56, 44.68, 43.95. HRMS (EI) Calcd for  $[C_{46}H_{34}Cl_2N_2O_4+Na]$ : 771.17933; found: 771.17953.

**1,1''-dibenzyl-2'-(4-bromobenzoyl)-5'-(4-bromophenyl)-5,5''-dichloro-5'-hydroxy-**

**1,1'',2,2''-tetrahydrodispiro[indole-3,1'-cyclopentane-3',3''-indole]-2,2''-dione (2g) :** The title

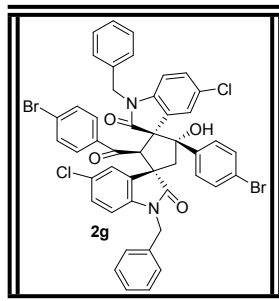

compound was prepared according to the general procedure as a white solid in 70 % yield; mp = 256-258 °C; IR (KBr): 3283, 3064, 2898, 1713, 1686, 1609, 1585, 1482, 1431, 1351, 1274, 1235, 1177, 1096, 1070, 1000, 931, 846, 808, 731, 692, 573, 550, 534, 453 cm<sup>-1</sup>; <sup>1</sup>H NMR (400 MHz, CDCl<sub>3</sub>) δ 8.17 (s, 1H), 7.90 (s, 1H), 7.45 – 7.18 (m, 10H), 7.15 – 6.96 (m, 7H), 6.91 (s, 1H), 6.54 (d, *J* = 6.3 Hz, 2H), 6.38 (dd, *J* = 15.9, 8.3 Hz, 2H), 5.26 (d, *J* = 16.0 Hz, 1H), 5.16 (s, 1H), 5.05 (d, *J* = 15.2 Hz, 1H), 4.52 (d, *J* = 15.1 Hz, 1H), 4.42 (d, *J* = 16.1 Hz, 1H), 4.36 (d, *J* = 14.0 Hz, 1H), 2.52 (d, *J* = 13.9 Hz, 1H), 1.25 (s, 1H). <sup>13</sup>C NMR (100 MHz, CDCl<sub>3</sub>) δ 195.00, 183.13, 176.17, 142.36, 140.13, 136.81, 134.91, 134.18, 131.63, 131.29, 130.99, 129.92, 129.30, 128.97, 128.75, 128.51, 128.38, 128.14, 127.97, 127.71, 127.41, 127.31, 127.25, 126.28, 126.08, 122.43, 109.93, 109.65, 83.96, 66.73, 65.21, 54.10, 46.63, 45.00, 44.08. HRMS (EI) Calcd for [C<sub>46</sub>H<sub>32</sub>Br<sub>2</sub>Cl<sub>2</sub>N<sub>2</sub>O<sub>4</sub>+Na]: 927.00036; found: 927.00075.

**2'-benzoyl-5'-hydroxy-1,1''-bis[(3-methylphenyl)methyl]-5'-phenyl-1,1'',2,2''-**

**tetrahydrodispiro[indole-3,1'-cyclopentane-3',3''-indole]-2,2''-dione (2h) :** The title

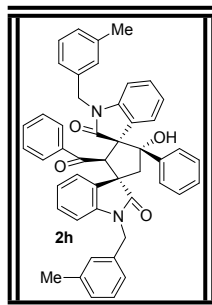

compound was prepared according to the general procedure as a white solid in 74 % yield; mp = 249-251 °C; IR (KBr): 3320, 2975, 2860, 1711, 1684, 1601, 1575, 1480, 1421, 1347, 1311, 1245, 1150, 1065, 927, 805, 775, 690, 650, 550, 511 cm<sup>-1</sup>; <sup>1</sup>H NMR (400 MHz, CDCl<sub>3</sub>) δ 8.22 (d, *J* = 6.8 Hz, 1H), 7.96 (d, *J* = 6.1 Hz, 1H), 7.38 – 6.91 (m, 21H), 6.85 (s, 1H), 6.42 (d, *J* = 6.9 Hz, 1H), 6.30 (d, *J* = 6.8 Hz, 1H), 6.11 (s, 1H), 5.36 (s, 1H), 5.23 (d, *J* = 15.1 Hz, 1H), 5.06 (d, *J* = 16.0 Hz, 1H), 4.48 (t, *J* = 14.4 Hz, 2H), 4.16 (d, *J* = 15.1 Hz, 1H), 2.57 (d, *J* = 13.8 Hz, 1H), 2.33 (s, 3H), 2.27 (s, 3H). <sup>13</sup>C NMR (100 MHz, CDCl<sub>3</sub>) δ 196.38, 183.88, 176.87, 143.96, 141.70, 138.75, 138.22, 137.92, 137.13, 135.76, 134.81, 132.23, 130.40, 128.84, 128.64, 128.55, 128.35, 128.31, 127.81, 127.78, 127.72, 127.63, 127.38, 127.07, 127.02, 126.72, 126.05, 125.69, 124.72, 124.21, 123.45, 121.86, 108.84, 108.53, 84.54, 66.63, 65.38, 54.29, 46.67, 44.53, 43.95, 21.45, 21.43. HRMS (EI) Calcd for [C<sub>48</sub>H<sub>40</sub>N<sub>2</sub>O<sub>4</sub>+Na]: 731.28858; found: 731.28998.

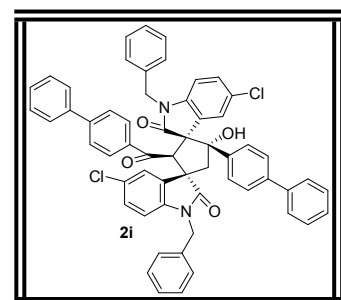

**1,1''-dibenzyl-5,5''-dichloro-5'-hydroxy-2'-(4-phenylbenzoyl)-5'-(4-phenylphenyl)-1,1'',2,2''-tetrahydrodispiro[indole-3,1'-**

**cyclopentane-3',3''-indole]-2,2''-dione (2i)** : The title compound was prepared according to the general procedure as a white solid in 64 % yield; mp = 238-240 °C; IR (KBr): 3312, 3062, 2925, 1687, 1605, 1481, 1431, 1340, 1221, 1086, 986, 910, 812, 750, 696, 575, 463 cm<sup>-1</sup>; <sup>1</sup>H NMR (400 MHz, CDCl<sub>3</sub>) δ 8.27 (d, *J* = 2.0 Hz, 1H), 7.99 (d, *J* = 2.0 Hz, 1H), 7.61 – 7.54 (m, 2H), 7.50 – 7.38 (m, 9H), 7.35 (t, *J* = 7.3 Hz, 1H), 7.31 – 7.18 (m, 11H), 7.11 (dd, *J* = 8.3, 2.1 Hz, 1H), 6.95 (dq, *J* = 9.7, 7.2 Hz, 5H), 6.53 (d, *J* = 7.1 Hz, 2H), 6.33 (d, *J* = 8.3 Hz, 1H), 6.26 (d, *J* = 8.4 Hz, 1H), 5.32 (s, 1H), 5.29 (d, *J* = 16.3 Hz, 1H), 5.18 (d, *J* = 15.3 Hz, 1H), 4.49 (d, *J* = 14.0 Hz, 1H), 4.44 (d, *J* = 16.2 Hz, 1H), 4.36 (d, *J* = 15.2 Hz, 1H), 2.59 (d, *J* = 14.0 Hz, 1H). <sup>13</sup>C NMR (100 MHz, CDCl<sub>3</sub>) δ 196.14, 184.08, 177.09, 145.06, 140.41, 139.70, 137.65, 135.89, 135.79, 135.00, 130.59, 129.13, 129.07, 128.88, 128.64, 128.53, 128.22, 127.95, 127.80, 127.45, 127.26, 127.17, 126.97, 126.79, 126.50, 126.39, 125.95, 124.45, 122.12, 109.02, 108.65, 84.57, 66.86, 65.56, 54.53, 44.83, 44.08, 29.84.

HRMS (EI) Calcd for [C<sub>58</sub>H<sub>42</sub>Cl<sub>2</sub>N<sub>2</sub>O<sub>4</sub>+Na]: 923.24193; found: 923.24227.

**1,1''-dibenzyl-2'-(4-bromobenzoyl)-5'-(4-bromophenyl)-5'-hydroxy-5,5''-dimethyl-**

**1,1'',2,2''-tetrahydrodispiro[indole-3,1'-cyclopentane-3',3''-indole]-2,2''-dione (2j)** : The title

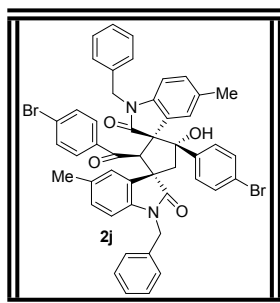

compound was prepared according to the general procedure as a white solid in 67 % yield; mp = 258-260 °C; IR (KBr): 3280, 2964, 2910, 2856, 1709, 1686, 1616, 1585, 1493, 1431, 1351, 1324, 1258, 1204, 1162, 1100, 1070, 1008, 931, 808, 777, 692, 657, 561, 534 cm<sup>-1</sup>; <sup>1</sup>H NMR (400 MHz, CDCl<sub>3</sub>) δ 7.96 (s, 1H), 7.73 (s, 1H), 7.40 – 7.32 (m, 5H), 7.29 – 7.18 (m, 5H), 7.06 – 6.92 (m, 8H), 6.81 (d, *J* = 7.6 Hz, 1H), 6.55 (d, *J* = 6.9 Hz,

2H), 6.33 (d, *J* = 7.9 Hz, 2H), 5.26 (d, *J* = 16.1 Hz, 1H), 5.21 (s, 1H), 5.07 (d, *J* = 15.1 Hz, 1H), 4.48 (d, *J* = 15.1 Hz, 1H), 4.41 (d, *J* = 13.8 Hz, 1H), 4.39 (d, *J* = 2.4 Hz, 1H), 2.51 (d, *J* = 13.9 Hz, 1H), 2.37 (s, 3H), 2.29 (s, 3H). <sup>13</sup>C NMR (100 MHz, CDCl<sub>3</sub>) δ 195.42, 183.55, 176.53, 141.42, 139.21, 137.59, 135.86, 135.61, 134.80, 134.14, 131.41, 131.04, 130.82, 130.12, 129.27, 129.11, 128.86, 128.61, 128.41, 128.20, 128.05, 127.52, 127.19, 127.04, 126.52, 126.33, 126.19, 122.11, 108.57, 108.40, 84.00, 66.56, 65.16, 54.18, 46.83, 44.79, 44.01, 21.29. HRMS (EI) Calcd for [C<sub>48</sub>H<sub>38</sub>Br<sub>2</sub>N<sub>2</sub>O<sub>4</sub>+Na]: 887.10960; found: 887.10953.

**2'acetyl-1,1''-dibenzyl-4'-hydroxy-4'-methyl-1,1'',2,2''-**

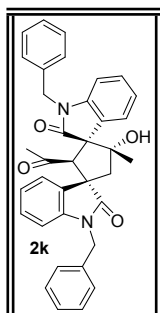

**tetrahydrodispiro[indole-3,3'-cyclopentane-1',3''-indole]-2,2''-dione (2k)**: The title compound was prepared according to the general procedure as a white solid in

48 % yield; mp = 218-220 °C; IR (KBr): 3335, 3056, 1702, 1676, 1611, 1411, 1367, 1183, 805, 772, 690, 647, 506, 537. <sup>1</sup>H NMR (400 MHz, CDCl<sub>3</sub>) δ 8.15 (d, *J* = 7.1 Hz, 1H), 7.59 (d, *J* = 7.1 Hz, 1H), 7.48 (d, *J* = 7.4 Hz, 2H), 7.36 (ddd, *J* = 28.6, 13.6, 7.9 Hz, 6H), 7.29 – 7.24 (m, 2H), 7.24 – 7.20 (m, 1H), 7.14 (dd, *J* = 16.6, 8.1 Hz, 2H), 7.02 (t, *J* = 7.3 Hz, 1H), 6.88 (d, *J* = 7.7 Hz, 1H), 6.71 (d, *J* = 7.7 Hz, 1H), 6.11 (s, 1H), 5.17 – 5.05 (m, 2H), 5.03 (t, *J* = 17.2 Hz, 2H), 4.43 (s, 1H), 3.51 (d, *J* = 14.1 Hz, 1H), 2.32 (d, *J* = 14.1 Hz, 1H), 1.22 (s, 3H), 1.05 (s, 3H). <sup>13</sup>C NMR (100 MHz, CDCl<sub>3</sub>) δ 201.60, 183.96, 178.00, 143.78, 141.97, 136.31, 135.29, 131.03, 129.05, 128.74, 128.39, 128.21, 127.61, 127.41, 127.30, 127.04, 126.95, 125.87, 124.72, 122.07, 109.31, 108.76, 82.48, 69.97, 65.07, 54.19, 49.81, 44.69, 44.15, 28.32, 20.02. HRMS (EI) Calcd for [C<sub>36</sub>H<sub>32</sub>N<sub>2</sub>O<sub>4</sub>]<sup>+</sup>: 556.2362; found: 556.2760.

**1,1''-dibenzyl-2'-cyclopropanecarbonyl-4'-cyclopropyl-4'-hydroxy-1,1'',2,2''-**

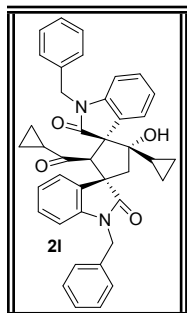

**tetrahydrodispiro[indole-3,3'-cyclopentane-1',3''-indole]-2,2''-dione (21):** The title compound was prepared according to the general procedure as a white solid in 43 % yield; mp = 235-237 °C; IR (KBr): 3332, 3049, 1701, 1671, 1601, 1410, 1360, 1173, 805, 770, 690, 640, 507, 532 cm<sup>-1</sup>; <sup>1</sup>H NMR (400 MHz, CDCl<sub>3</sub>) δ 8.12 (d, *J* = 7.7 Hz, 1H), 7.59–7.57 (d, *J* = 7.6 Hz, 1H), 7.48–7.46 (d, *J* = 8.0 Hz, 1H), 7.43–7.17 (m, 12H), 7.14–7.10 (t, *J* = 8.0 Hz, 1H), 7.04–7.00 (t, *J* = 8.0 Hz, 1H), 6.90–6.88 (d, *J* = 8.0 Hz, 1H), 6.75–6.73 (d, *J* = 8.0 Hz, 1H), 6.08 (s, 1H), 5.32–5.28 (d, *J* = 16.0 Hz, 1H), 5.18 – 5.14 (d, *J* = 16.0 Hz, 1H), 4.95 – 4.91 (d, *J* = 16.0 Hz, 1H), 4.87– 4.83 (d, *J* = 16.0 Hz, 1H), 3.47–3.36 (m, 2H), 3.29–3.23 (m, 1H), 2.92–2.88 (m, 1H), 2.67– 2.63 (m, 1H), 2.34– 2.30 (d, *J* = 16.0 Hz, 1H), 1.83–1.78 (m, 2H), 1.72–1.66 (m, 1H), 1.48–1.36 (m, 1H), 1.22–1.19 (m, 1H), 0.99–0.97 (m, 1H); <sup>13</sup>C NMR (100 MHz, CDCl<sub>3</sub>) δ 202.90, 183.87, 177.63, 143.68, 142.07, 136.25, 135.17, 130.54, 129.10 (2C), 128.97, 128.81 (2C), 128.57, 128.31, 127.76 (3C), 127.54, 127.49 (2C), 127.22, 127.02, 125.83, 124.70, 122.20, 109.59, 108.81, 84.37, 69.06, 64.99, 54.09, 45.36, 44.79, 44.22, 43.71, 38.86, 31.40, 27.18, 25.62; HRMS (EI) Calcd for [C<sub>40</sub>H<sub>36</sub>N<sub>2</sub>O<sub>4</sub>]<sup>+</sup>: 608.2675; found: 608.2674.



**4'-hydroxy-4'-(naphthalen-1-yl)-2'-(naphthalene-1-carbonyl)-2H,2''H-**

**dispiro[acenaphthylene-1,3'-cyclopentane-1',1''-acenaphthylene]-2,2''-dione (4a) :**

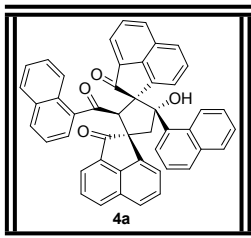

compound was prepared according to the general procedure as a white solid in 77 % yield; mp = 254-256 °C; IR (KBr): 3372, 3072, 2918, 1701, 1682, 1605, 1482, 1424, 1366, 1339, 1274, 1231, 1174, 1077, 1000, 927, 815, 765, 746, 700, 580, 554 cm<sup>-1</sup>; <sup>1</sup>H NMR (400 MHz, CDCl<sub>3</sub>) δ 8.46 (d, J=6.0 Hz, 1H), 8.25 (d, J=7.2 Hz, 1H), 8.07 (d, J=6.8 Hz, 1H), 7.96 (d, J = 8.0 Hz, 1H), 7.86–7.83 (dd, J = 5.2, 5.6 Hz, 2H), 7.80 (d, J = 6.8 Hz, 1H), 7.75–7.72 (dd, J=7.2, 8.0 Hz, 1H), 7.66–7.54 (m, 3H), 7.39–7.29 (m, 4H), 7.24 (merged dd, 1H), 7.16–7.12 (m, 3H), 7.06 (d, J=8.1 Hz, 2H), 6.94 (d, J = 8.4 Hz, 2H), 6.81 (d, J = 8.8 Hz, 2H), 6.72 (s, 1H), 5.63 (s, 1H), 5.30 (s, 1H), 4.61 (d, J = 14.0 Hz, 1H), 2.73 (d, J = 14.0 Hz, 1H); <sup>13</sup>C NMR (100 MHz, CDCl<sub>3</sub>) δ 213.12, 204.61, 197.05, 144.42, 142.24, 141.78, 140.56, 139.98, 139.78, 139.56, 137.86, 137.49, 134.84, 134.39, 133.13, 131.47, 130.74, 130.24, 130.01, 129.55, 128.72 (2C), 128.55 (2C), 128.18, 128.00, 127.76, 127.71, 127.18, 127.09, 126.97 (2C), 126.86 (2C), 126.58, 125.87 (3C), 124.84, 124.53, 122.85, 122.81, 120.79, 84.62, 71.86, 67.90, 59.84, 47.28; HRMS (EI) Calcd for [C<sub>48</sub>H<sub>30</sub>O<sub>4</sub>+Na]: 693.20418; found: 693.20439.

**2'-(4-bromobenzoyl)-4'-(4-bromophenyl)-4'-hydroxy-2H,2''H-dispiro[acenaphthylene-1,3'-cyclopentane-1',1''-acenaphthylene]-2,2''-dione (4b) :**

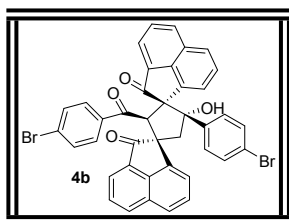

according to the general procedure as a white solid in 74 % yield; mp = 250-252 °C; IR (KBr): 3334, 3056, 2925, 1713, 1693, 1605, 1562, 1497, 1435, 1393, 1324, 1270, 1235, 1096, 1077, 1012, 838, 777, 700, 538 cm<sup>-1</sup>; <sup>1</sup>H NMR (400 MHz, CDCl<sub>3</sub>) δ 8.39 (d, J = 6.7 Hz, 1H), 8.17 (d, J = 6.8 Hz, 1H), 8.06 (d, J = 7.0 Hz, 1H), 7.98 (d, J = 8.0 Hz, 2H), 7.83 (dd, J = 11.3, 7.8 Hz, 2H), 7.74 – 7.65 (m, 3H), 7.61 (dd, J = 11.9, 7.2 Hz, 2H), 7.01 (d, J = 8.2 Hz, 2H), 6.88 (d, J = 8.1 Hz, 2H), 6.71 (q, J = 8.2 Hz, 4H), 6.66 (s, 1H), 5.47 (s, 1H), 4.48 (d, J = 14.3 Hz, 1H), 2.64 (d, J = 14.2 Hz, 1H). <sup>13</sup>C NMR (100 MHz, CDCl<sub>3</sub>) δ 212.77, 204.32, 196.46, 141.63, 139.53, 137.40, 137.23, 134.78, 134.10, 133.47, 131.00, 130.41, 130.32, 130.02, 129.50, 128.17, 127.99, 127.92, 126.62, 125.04, 124.79, 124.46, 123.08, 122.86, 121.64, 120.97, 84.25, 71.67, 67.70, 59.62, 47.03. HRMS (EI) Calcd for [C<sub>40</sub>H<sub>24</sub>Br<sub>2</sub>O<sub>4</sub>+Na]: 748.99390; found: 748.99408.

**4'-hydroxy-2'-(4-phenylbenzoyl)-4'-(4-phenylphenyl)-2H,2''H-dispiro[acenaphthylene-1,3'-cyclopentane-1',1''-acenaphthylene]-2,2''-dione (4c) :**

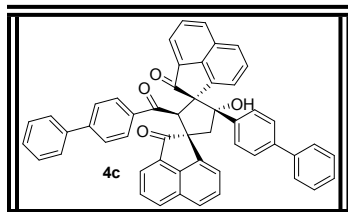

compound was prepared according to the general procedure as a white solid in 71 % yield; mp = 244-246 °C; IR (KBr): 3372, 3045, 2925, 1716, 1689, 1601, 1493, 1424, 1343, 1270, 1231, 1096, 1008, 919, 842, 777, 700, 646 cm<sup>-1</sup>; <sup>1</sup>H NMR (400 MHz, CDCl<sub>3</sub>) δ 8.47 (d, *J* = 5.6 Hz, 1H), 8.25 (d, *J* = 6.9 Hz, 1H), 8.07 (d, *J* = 7.0 Hz, 1H), 7.96 (d, *J* = 8.1 Hz, 1H), 7.86 (d, *J* = 5.5 Hz, 1H), 7.84 (d, *J* = 5.2 Hz, 1H), 7.80 (d, *J* = 6.9 Hz, 1H), 7.77 – 7.70 (m, 1H), 7.62 (td, *J* = 14.9, 7.8 Hz, 3H), 7.58 – 7.53 (m, 1H), 7.38 – 7.30 (m, 6H), 7.29 – 7.21 (m, 3H), 7.16 – 7.11 (m, 4H), 7.06 (d, *J* = 8.5 Hz, 2H), 6.94 (d, *J* = 8.3 Hz, 2H), 6.81 (d, *J* = 8.3 Hz, 1H), 6.72 (s, 1H), 5.63 (s, 1H), 4.61 (d, *J* = 14.2 Hz, 1H), 2.73 (d, *J* = 14.2 Hz, 1H). <sup>13</sup>C NMR (100 MHz, CDCl<sub>3</sub>) δ 213.12, 204.61, 197.05, 144.42, 142.24, 140.56, 139.98, 139.78, 139.56, 137.86, 137.49, 134.84, 134.39, 133.13, 131.47, 130.74, 130.24, 130.01, 129.55, 128.72, 128.55, 128.18, 128.00, 127.76, 127.71, 127.18, 127.09, 126.97, 126.86, 126.58, 125.87, 124.84, 124.53, 122.85, 122.81, 120.79, 84.62, 71.86, 67.90, 59.84, 47.28. HRMS (EI) Calcd for [C<sub>52</sub>H<sub>34</sub>O<sub>4</sub>+Na]: 745.23548; found: 745.23567.

**2'-(4-chlorobenzoyl)-4'-(4-chlorophenyl)-4'-hydroxy-2H,2''H-dispiro[acenaphthylene-1,3'-cyclopentane-1',1''-acenaphthylene]-2,2''-dione (4d)** : The title compound was prepared

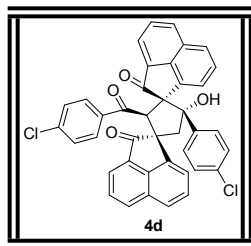

according to the general procedure as a white solid in 64 % yield; mp = 240-242 °C; IR (KBr): 3368, 3045, 2929, 1720, 1682, 1601, 1489, 1428, 1343, 1270, 1227, 1093, 1008, 923, 846, 777, 700 cm<sup>-1</sup>; <sup>1</sup>H NMR (400 MHz, CDCl<sub>3</sub>) δ 8.38 (d, *J* = 6.7 Hz, 1H), 8.16 (d, *J* = 6.8 Hz, 1H), 8.05 (d, *J* = 7.0 Hz, 1H), 7.97 (d, *J* = 8.0 Hz, 2H), 7.84 (d, *J* = 8.5 Hz, 1H), 7.81 (d, *J* = 7.1 Hz, 1H), 7.72 – 7.66 (m, 2H), 7.60 (dd, *J* = 11.9, 7.2 Hz, 2H), 7.25 (s, 1H), 7.00 (d, *J* = 8.2 Hz, 2H), 6.87 (d, *J* = 8.1 Hz, 2H), 6.71 (q, *J* = 8.2 Hz, 4H), 6.66 (s, 1H), 5.46 (s, 1H), 4.48 (d, *J* = 14.3 Hz, 1H), 2.63 (d, *J* = 14.2 Hz, 1H). <sup>13</sup>C NMR (100 MHz, CDCl<sub>3</sub>) δ 212.76, 204.31, 196.45, 141.63, 139.53, 137.39, 137.23, 134.78, 134.09, 133.46, 131.00, 130.41, 130.31, 130.01, 129.50, 128.17, 127.98, 127.92, 126.62, 125.03, 124.79, 124.46, 123.07, 122.86, 121.63, 120.97, 84.25, 71.66, 67.70, 59.61, 47.02. HRMS (EI) Calcd for [C<sub>40</sub>H<sub>24</sub>Cl<sub>2</sub>O<sub>4</sub>+Na]: 661.09493; found: 661.09497.

### NMR Spectra of compounds 2a-j and 4a-d

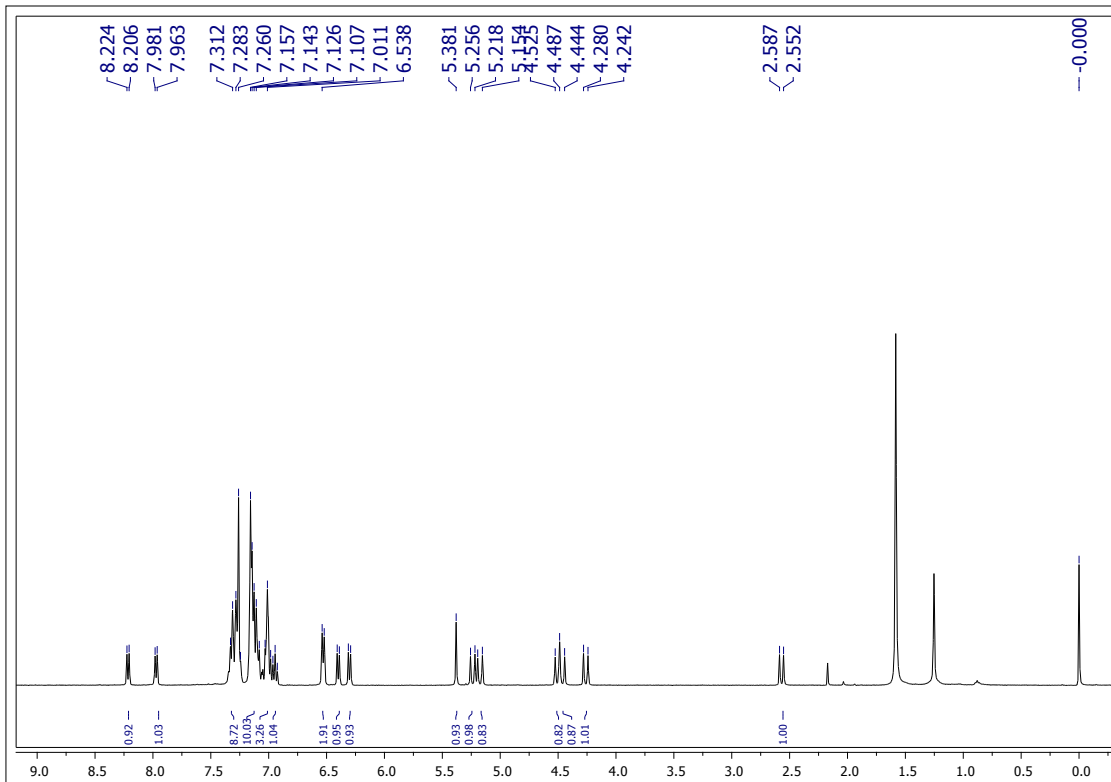

Figure S1.  $^1\text{H}$  NMR spectrum of compound **2a**

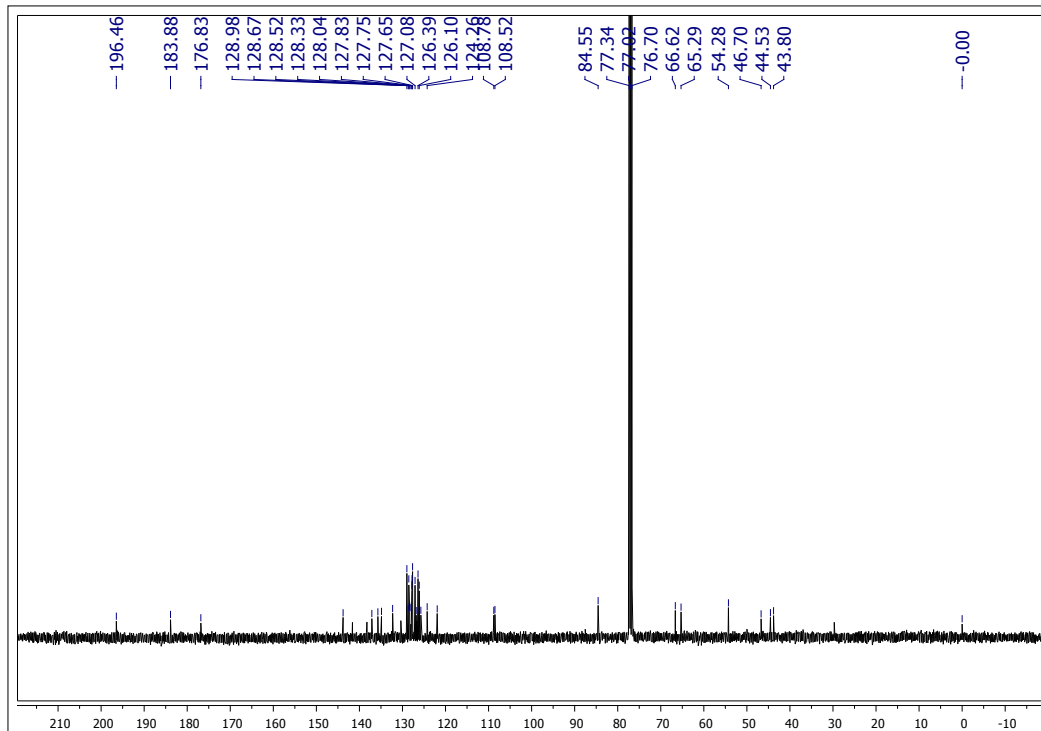

Figure S2.  $^{13}\text{C}$  NMR spectrum of compound **2a**

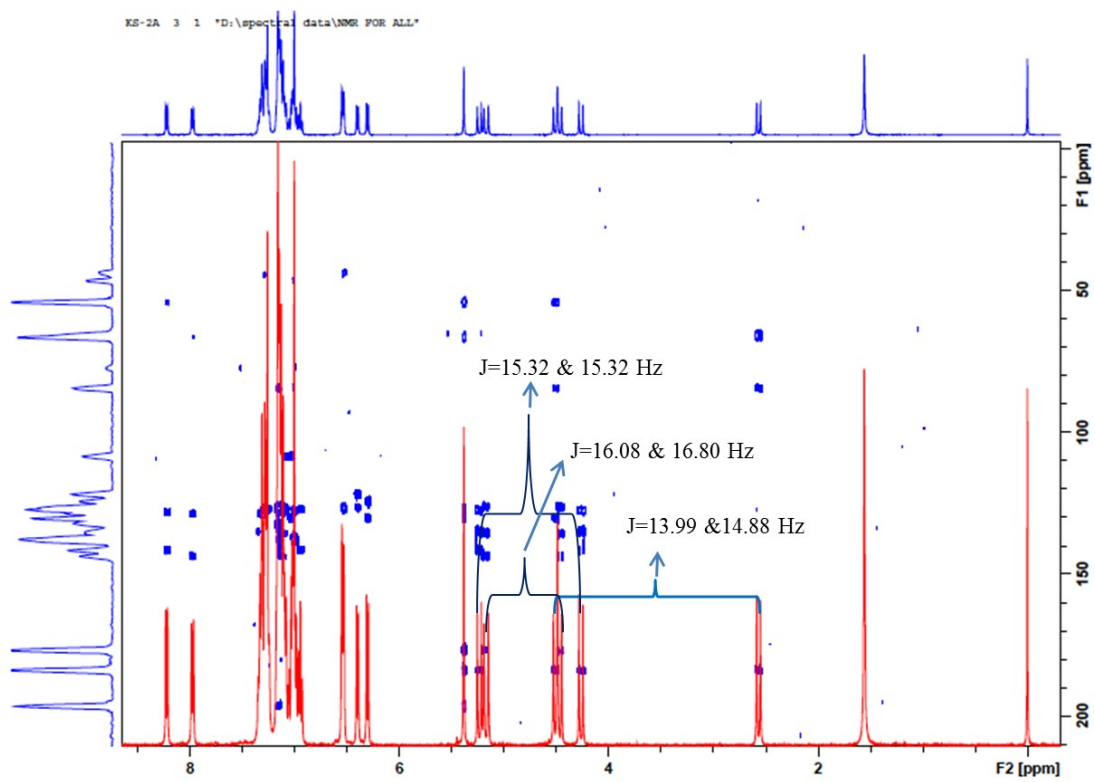

Figure S3. HMBC spectrum of compound **2a**

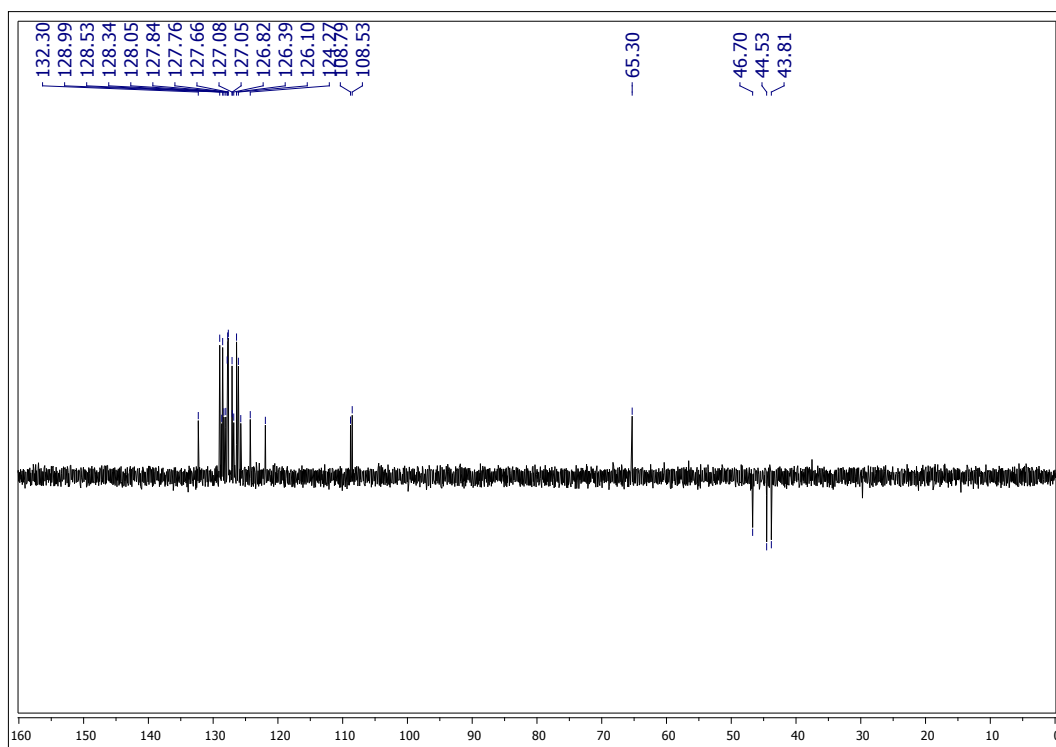

Figure S4. DEPT-135 spectrum of compound **2a**

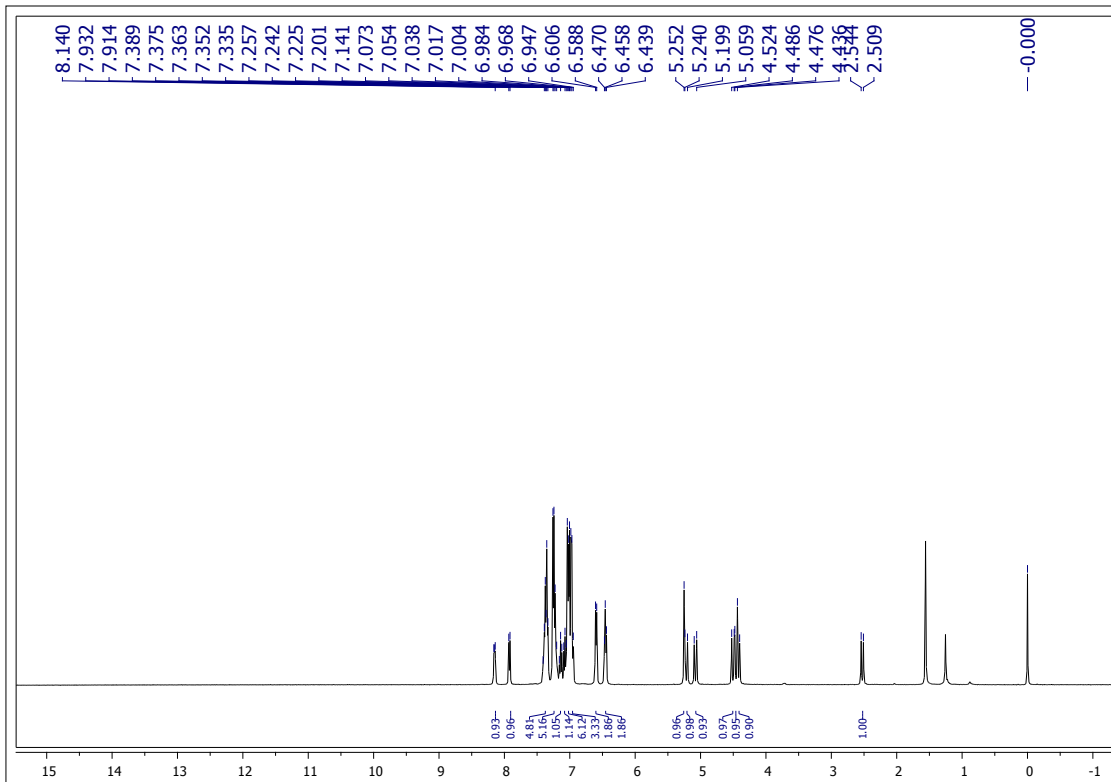

Figure S5.  $^1\text{H}$  NMR spectrum of compound **2b**

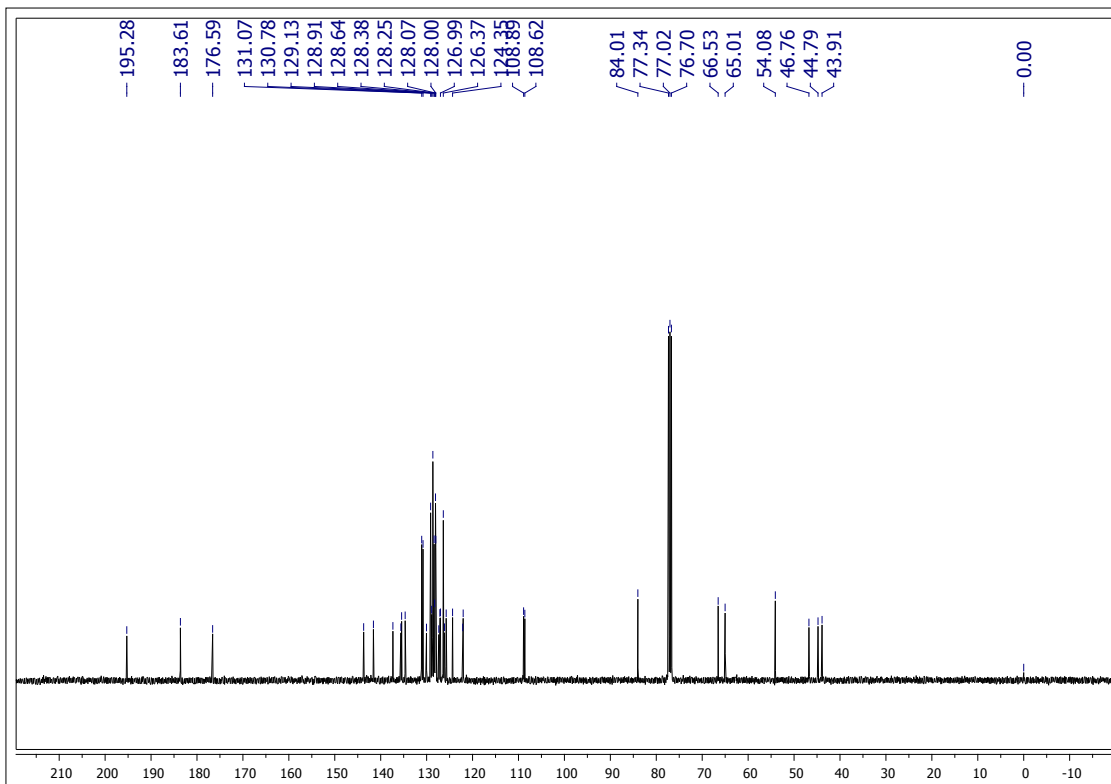

Figure S6.  $^{13}\text{C}$  NMR spectrum of compound **2b**

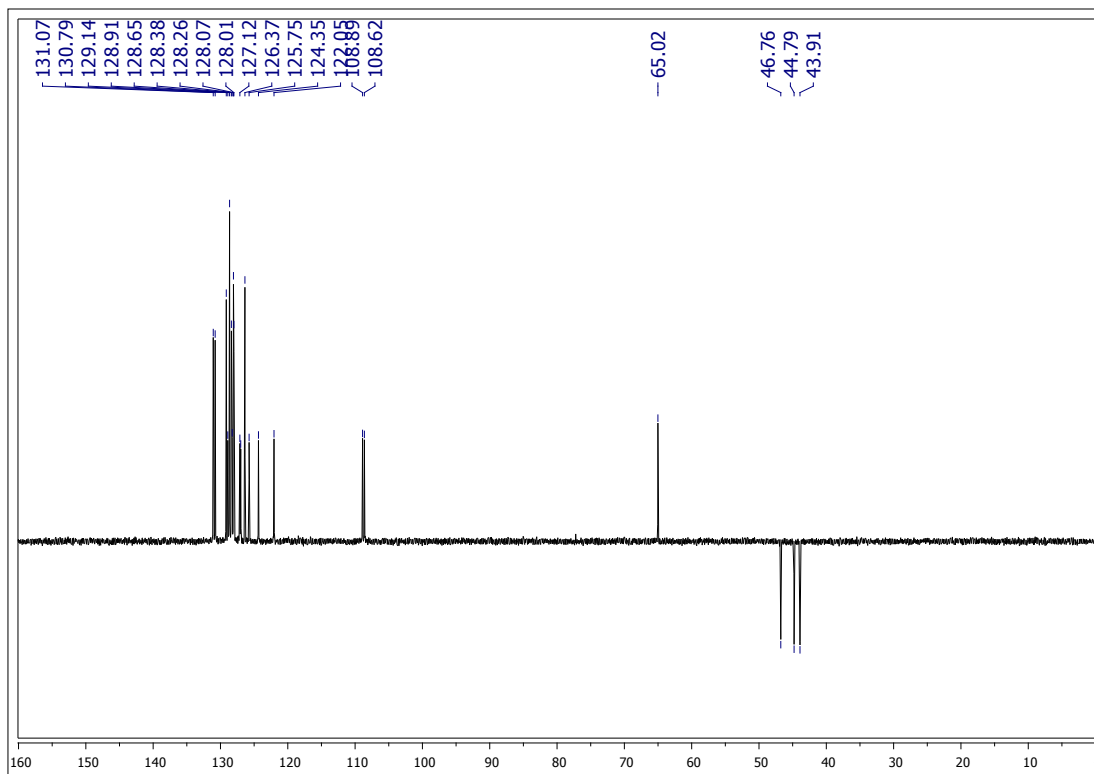

Figure S7. DEPT-135 spectrum of compound **2b**

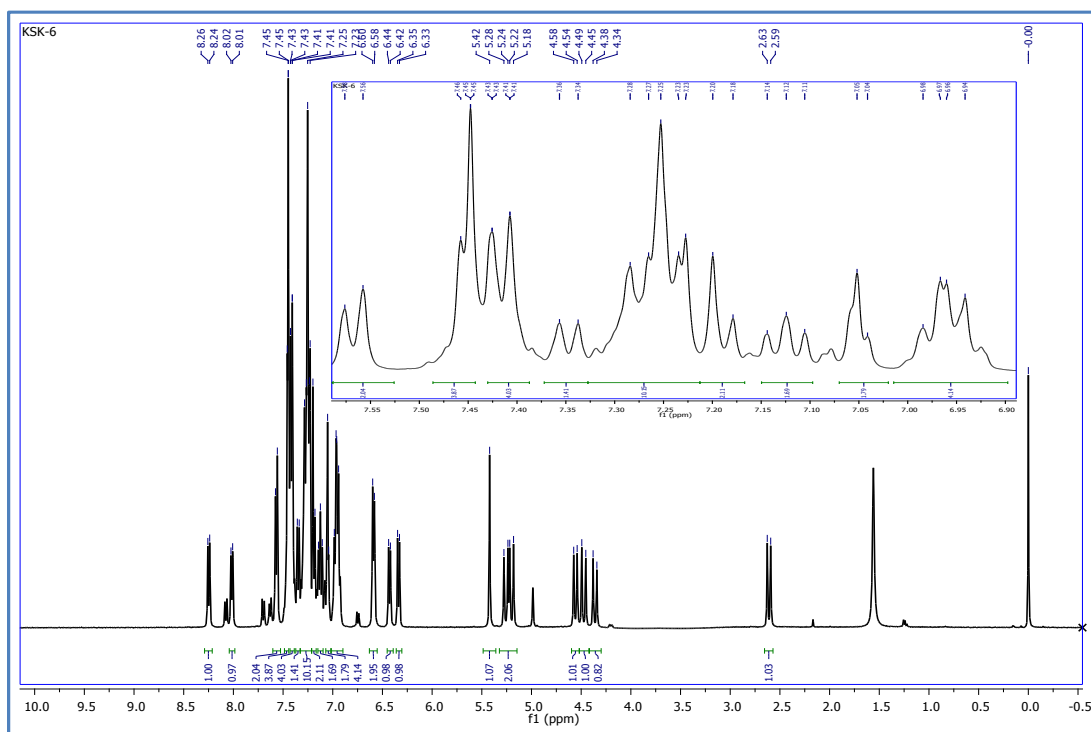

Figure S8. <sup>1</sup>H NMR spectrum of compound **2c**



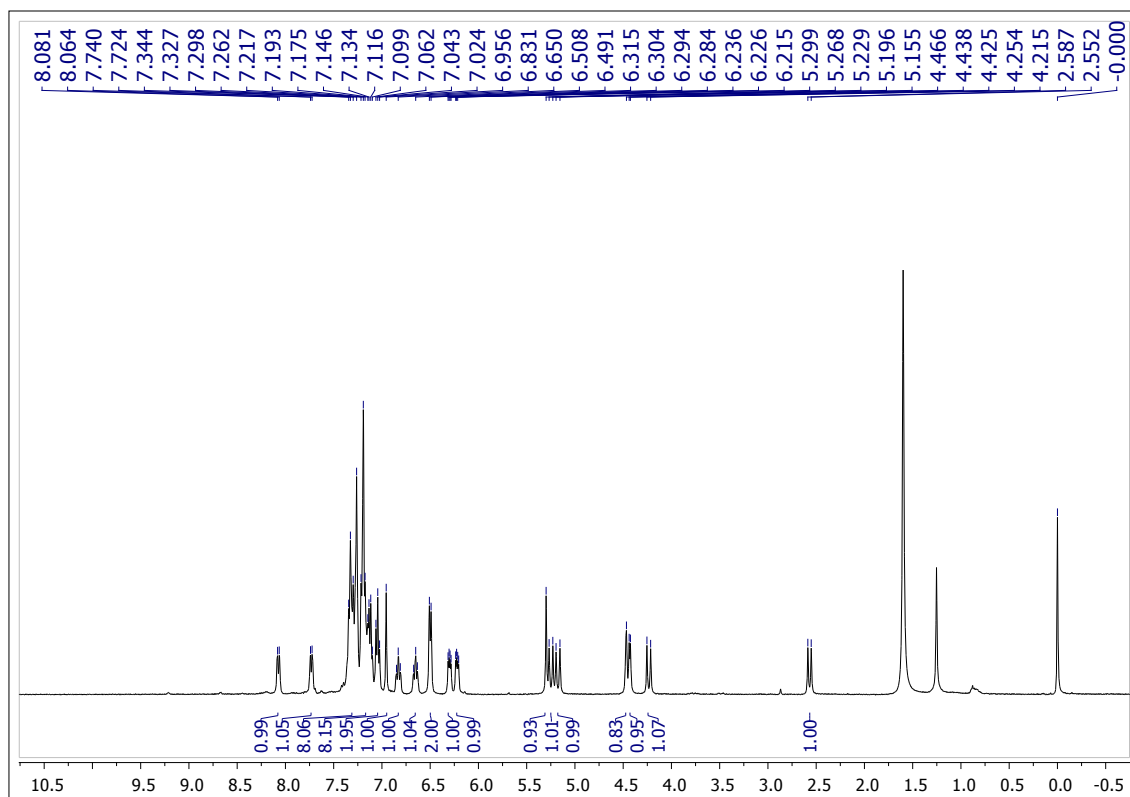

Figure S11. <sup>1</sup>H NMR spectrum of compound 2d

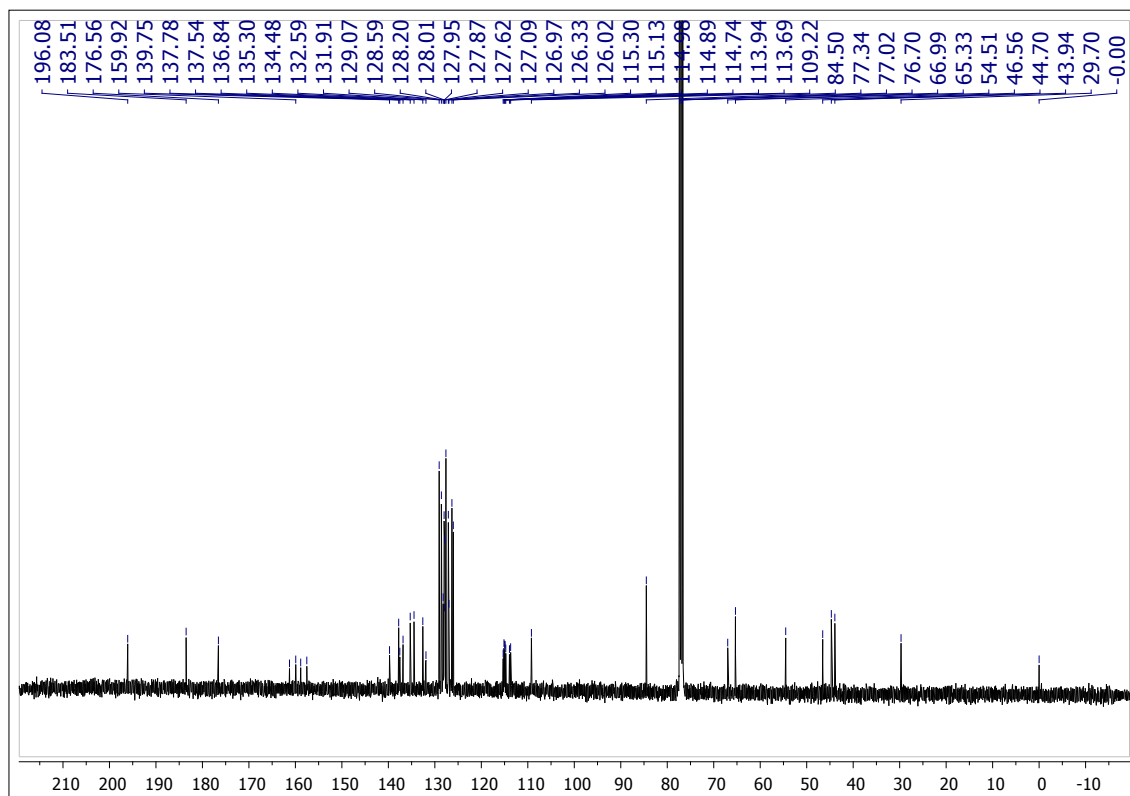

Figure S12. <sup>13</sup>C NMR spectrum of compound 2d



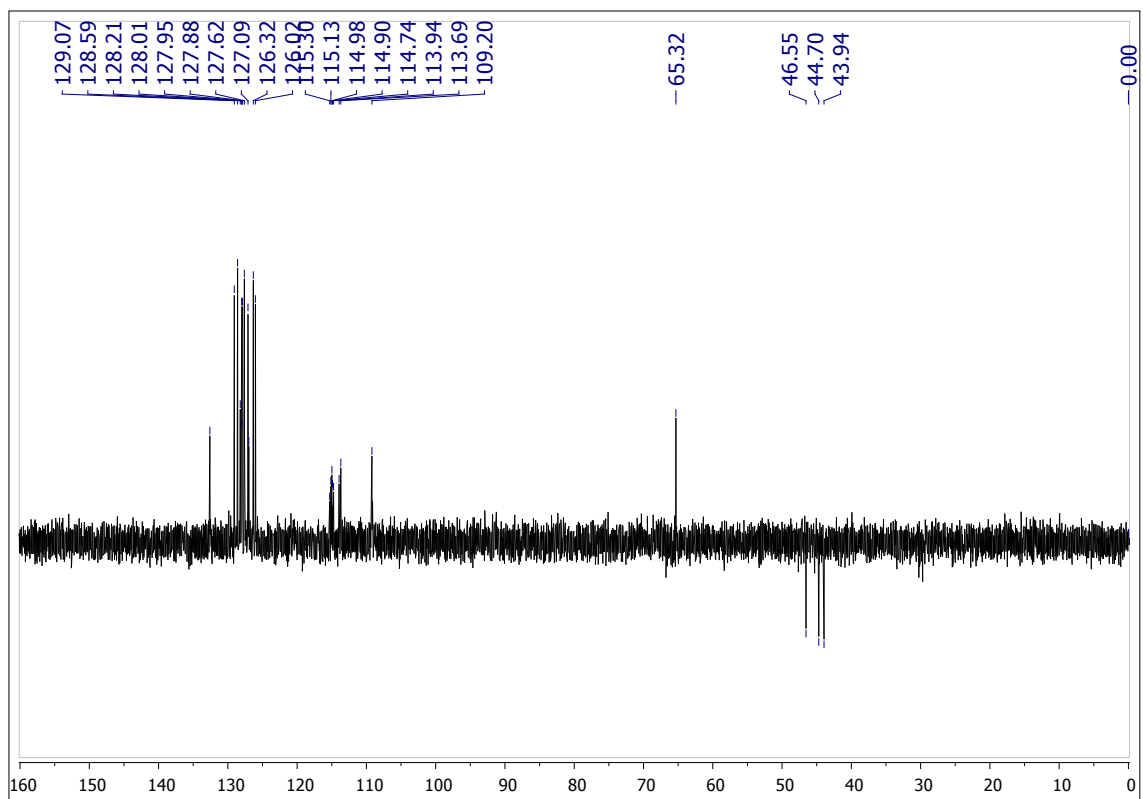

Figure S13. DEPT-135 spectrum of compound 2d

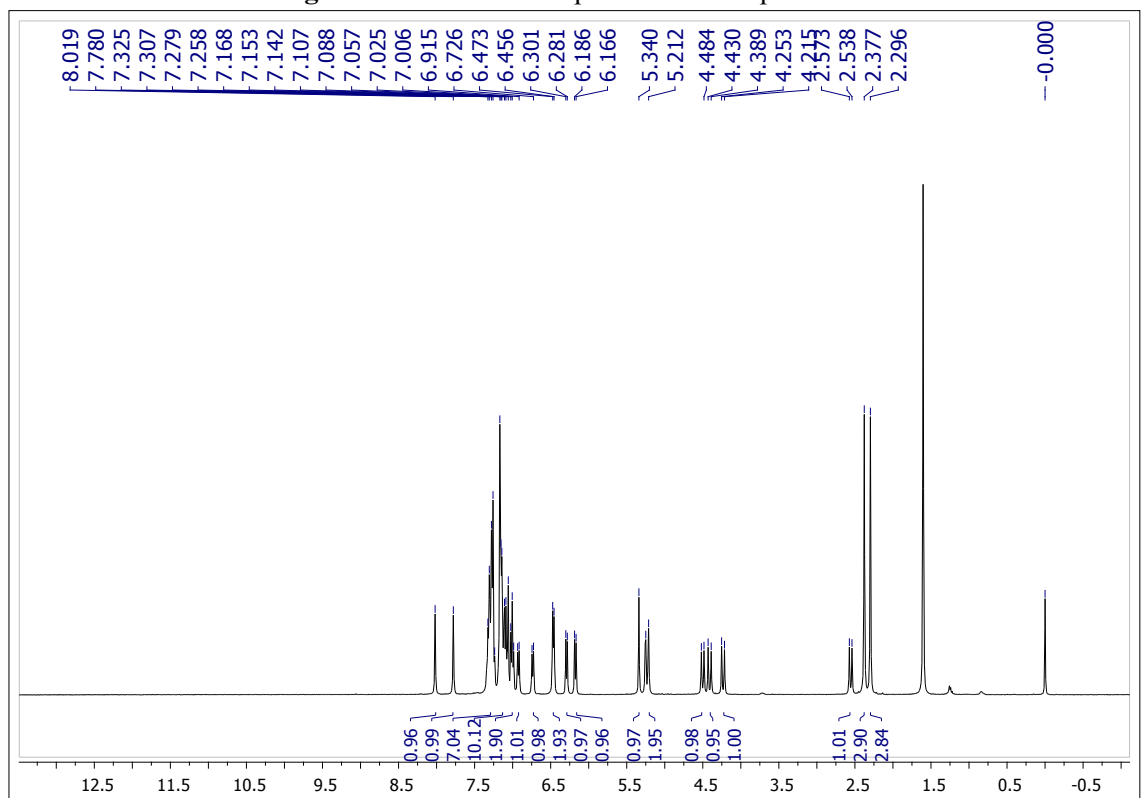

Figure S14. <sup>1</sup>H NMR spectrum of compound 2e

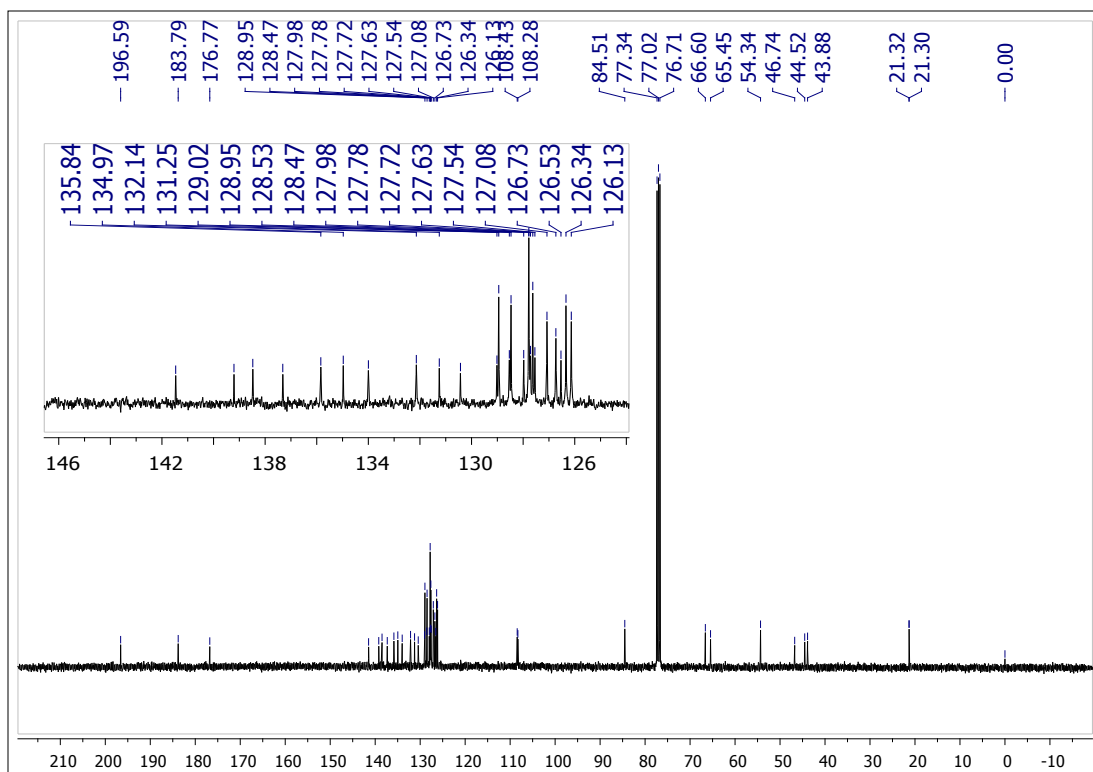

Figure S15.  $^{13}\text{C}$  NMR spectrum of compound **2e**

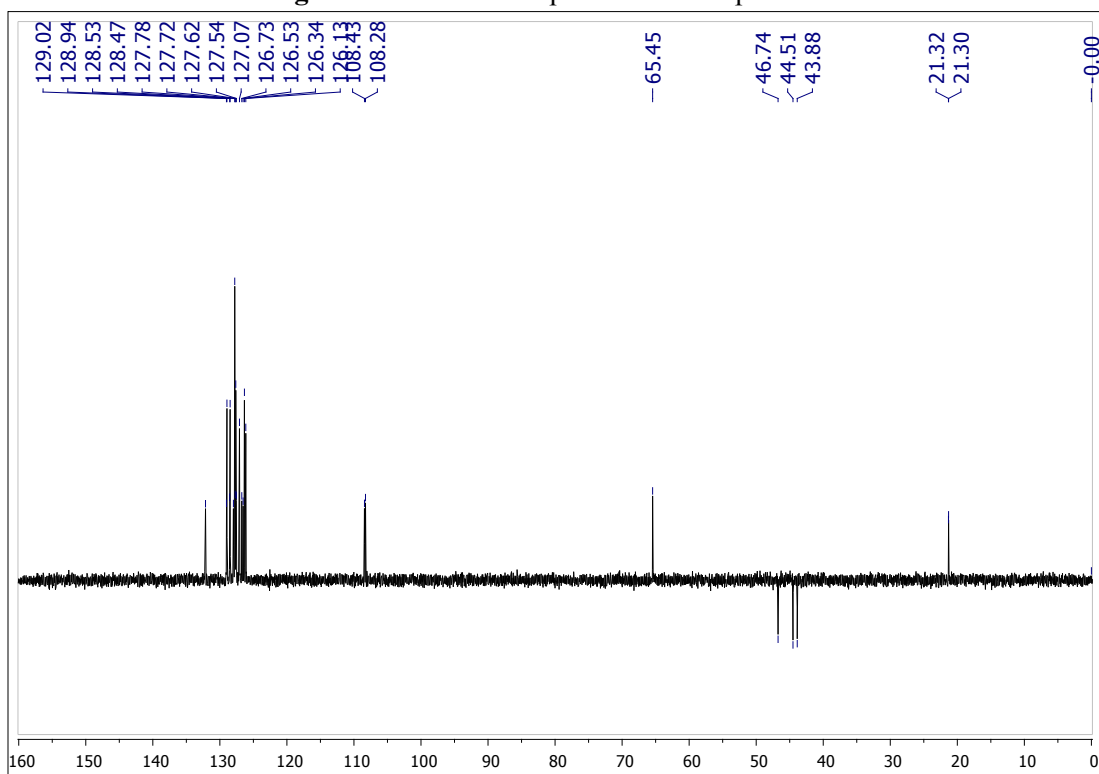

Figure S16. DEPT-135 spectrum of compound **2e**

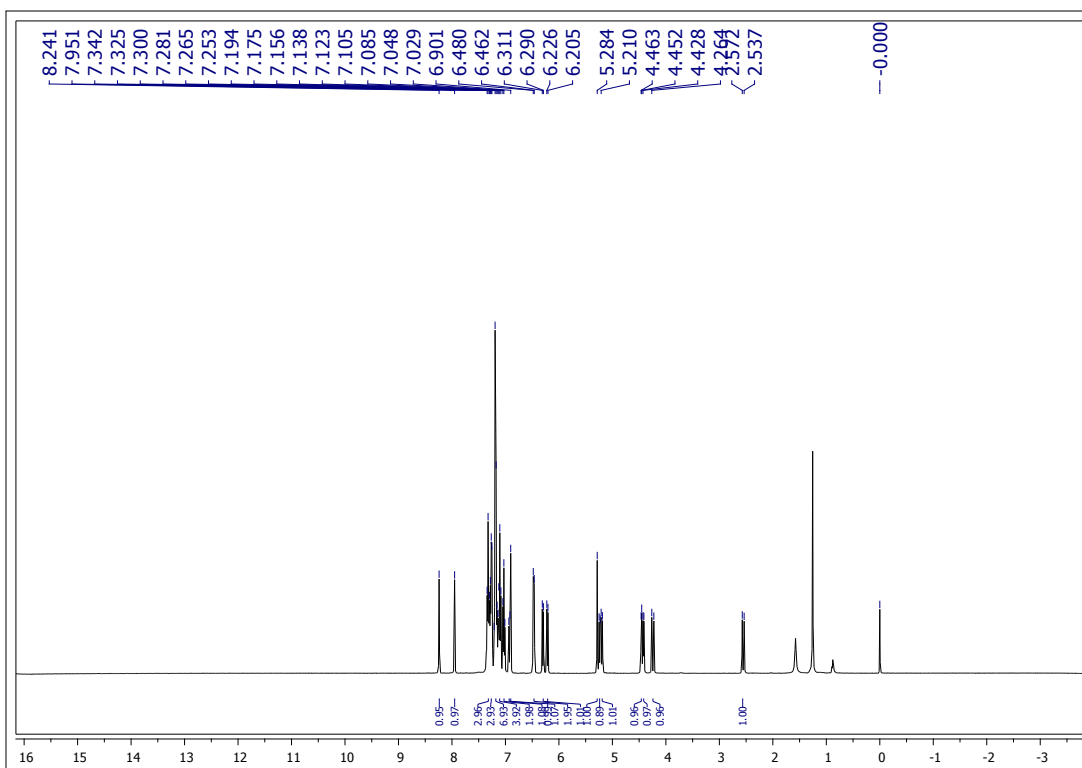

Figure S17.  $^1\text{H}$  NMR spectrum of compound **2f**

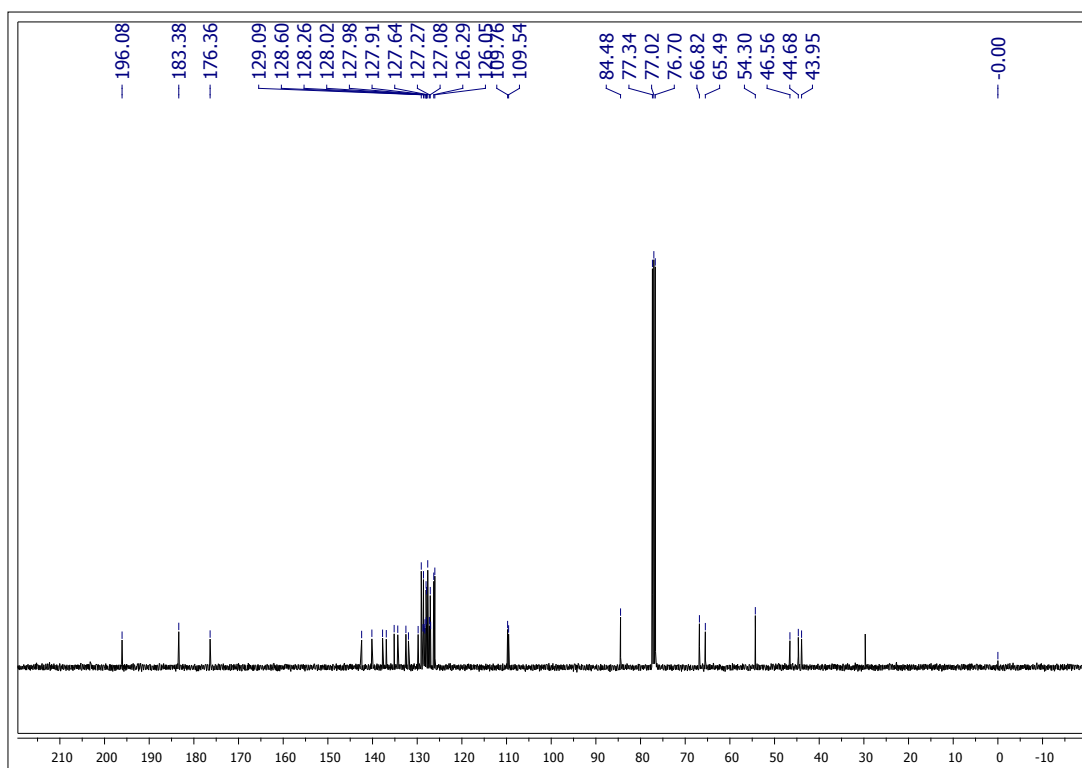

Figure S18.  $^{13}\text{C}$  NMR spectrum of compound **2f**

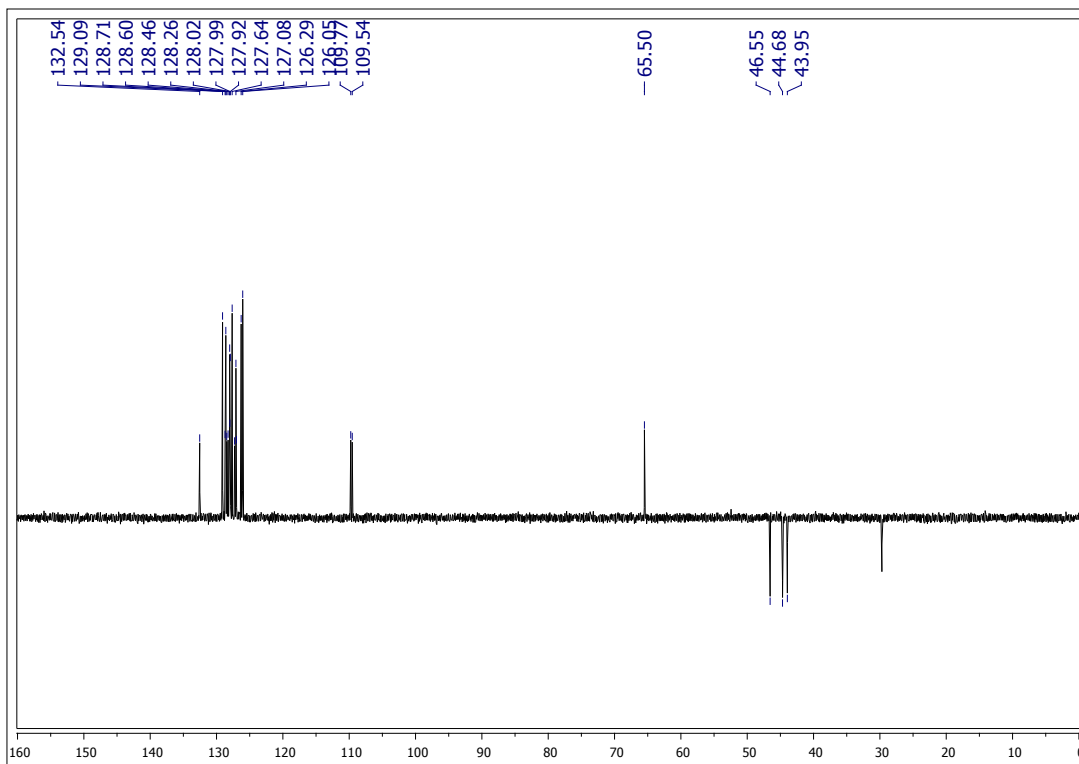

Figure S19. DEPT-135 spectrum of compound 2f

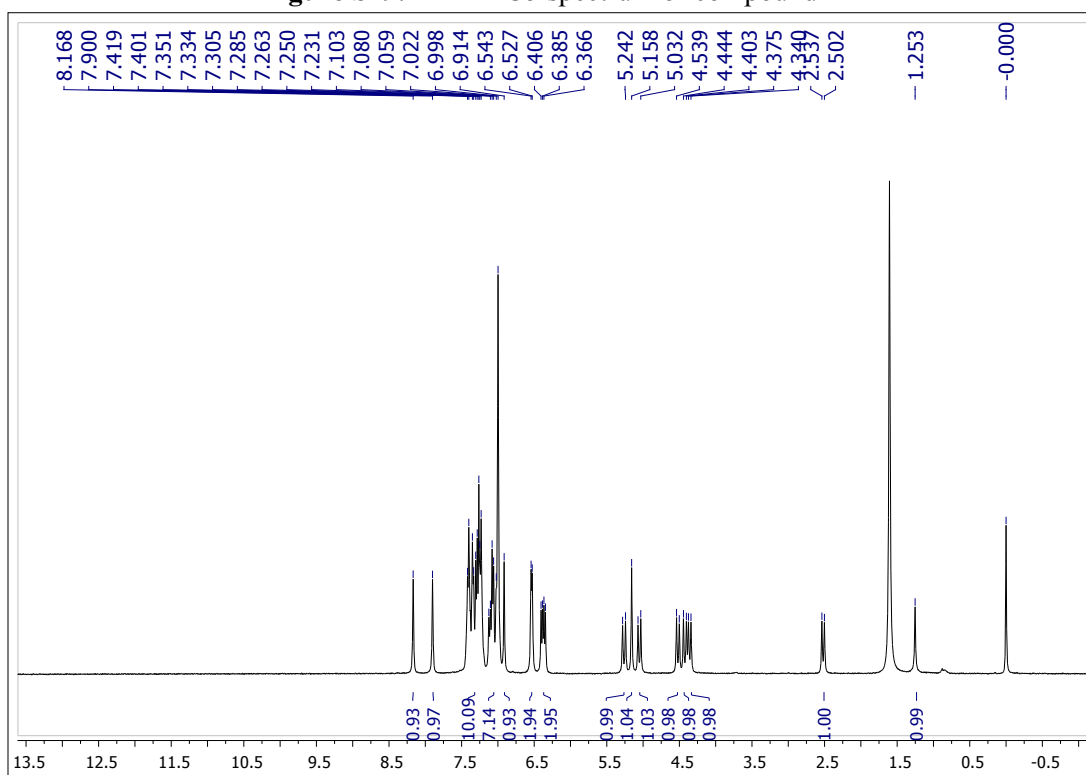

Figure S20. <sup>1</sup>H NMR spectrum of compound 2g

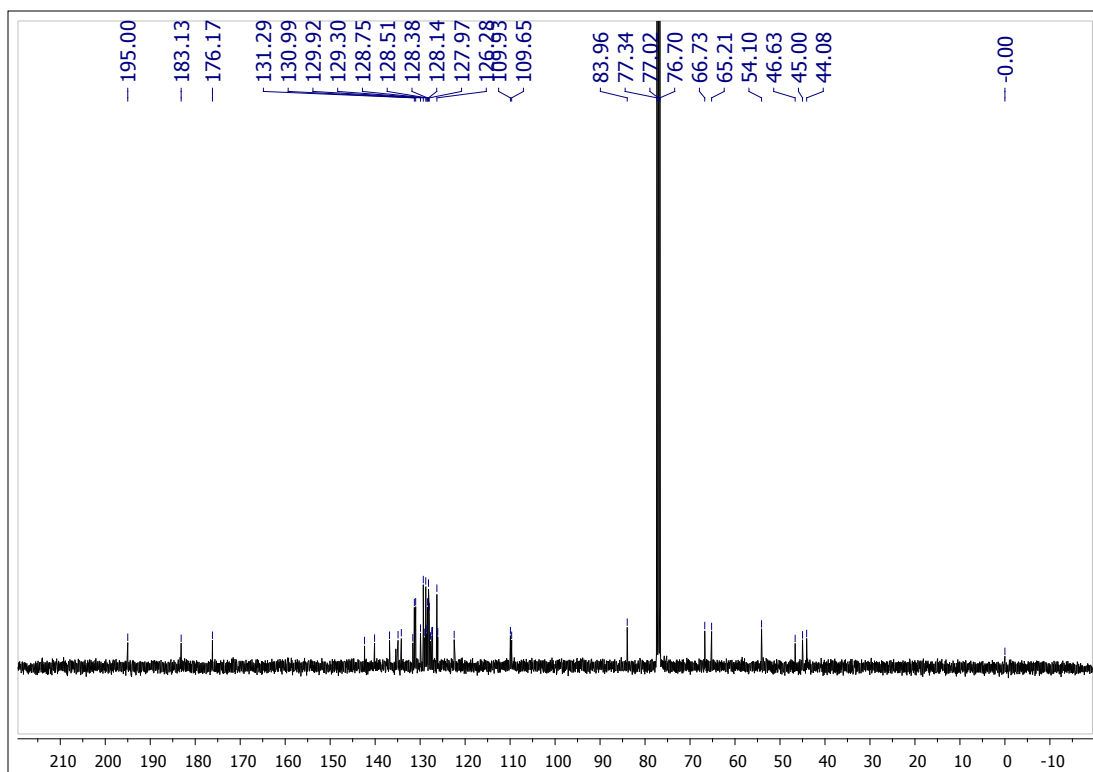

Figure S21.  $^{13}\text{C}$  NMR spectrum of compound **2g**

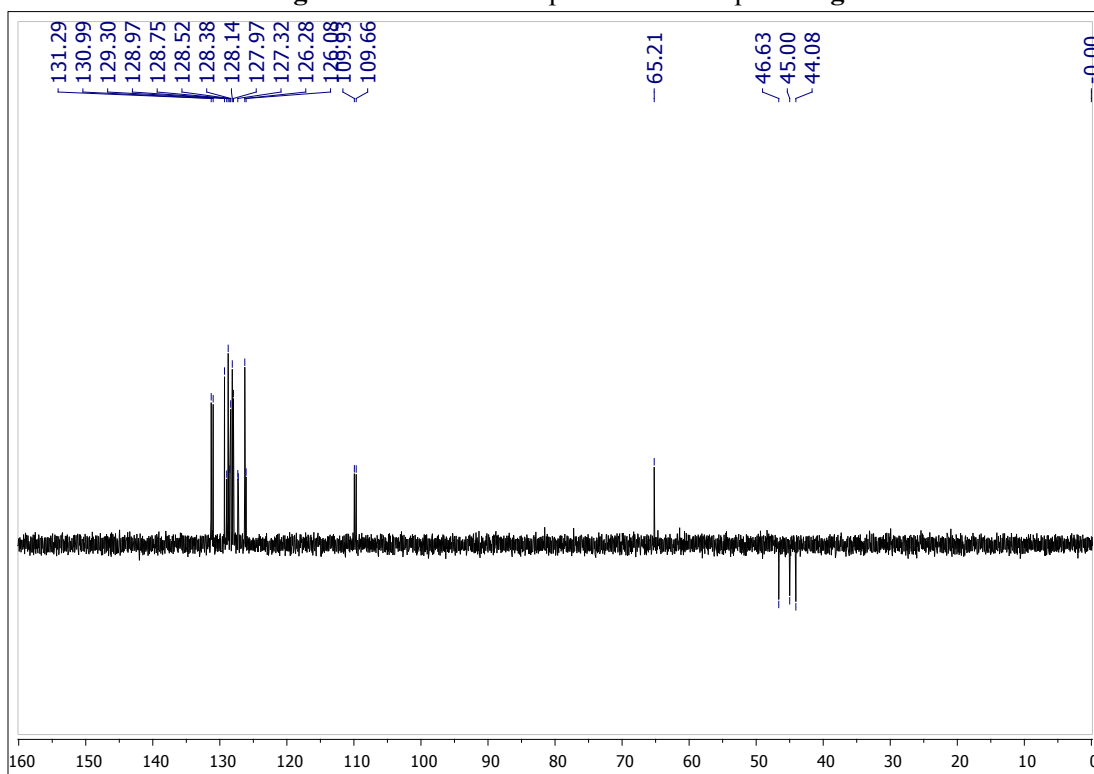

Figure S22. DEPT-135 spectrum of compound **2g**

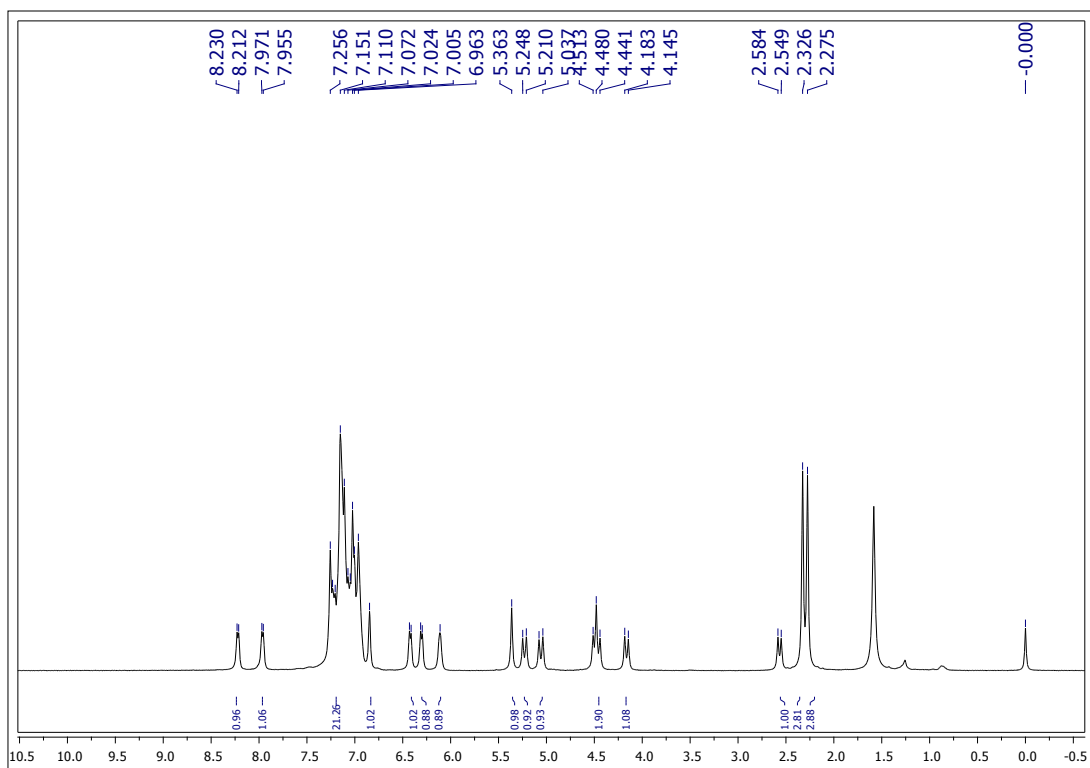

Figure S23. <sup>1</sup>H NMR spectrum of compound **2h**

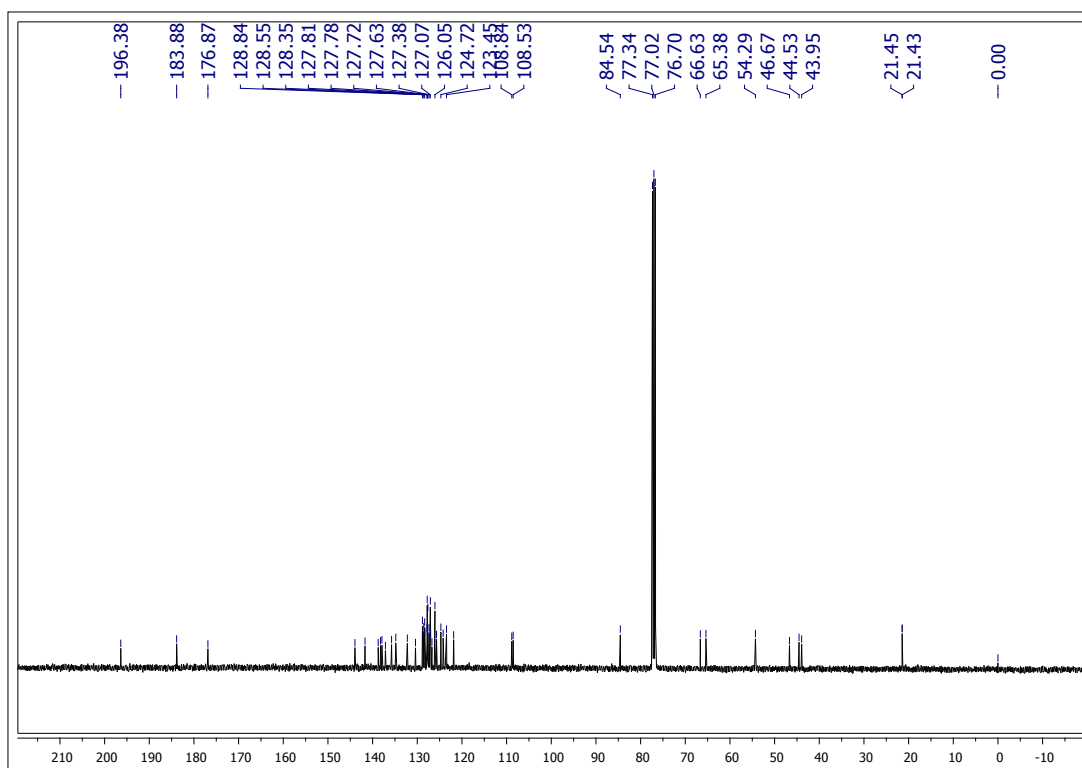

Figure S24. <sup>13</sup>C NMR spectrum of compound **2h**

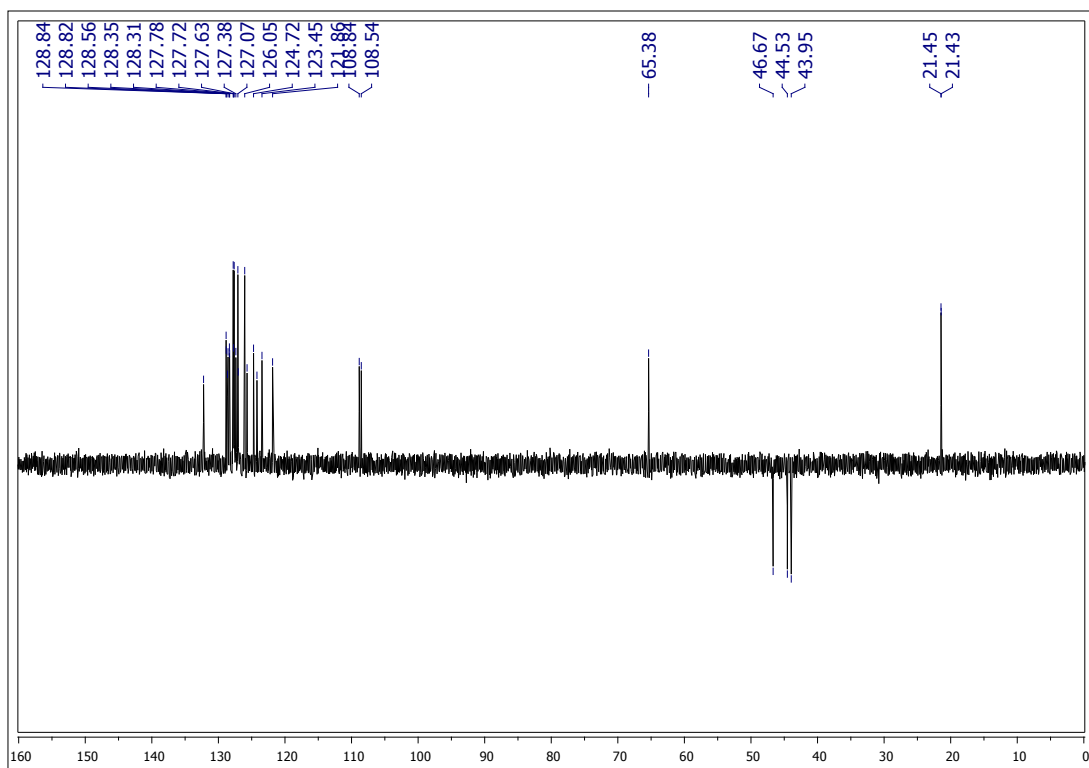

Figure S25. DEPT-135 spectrum of compound 2h

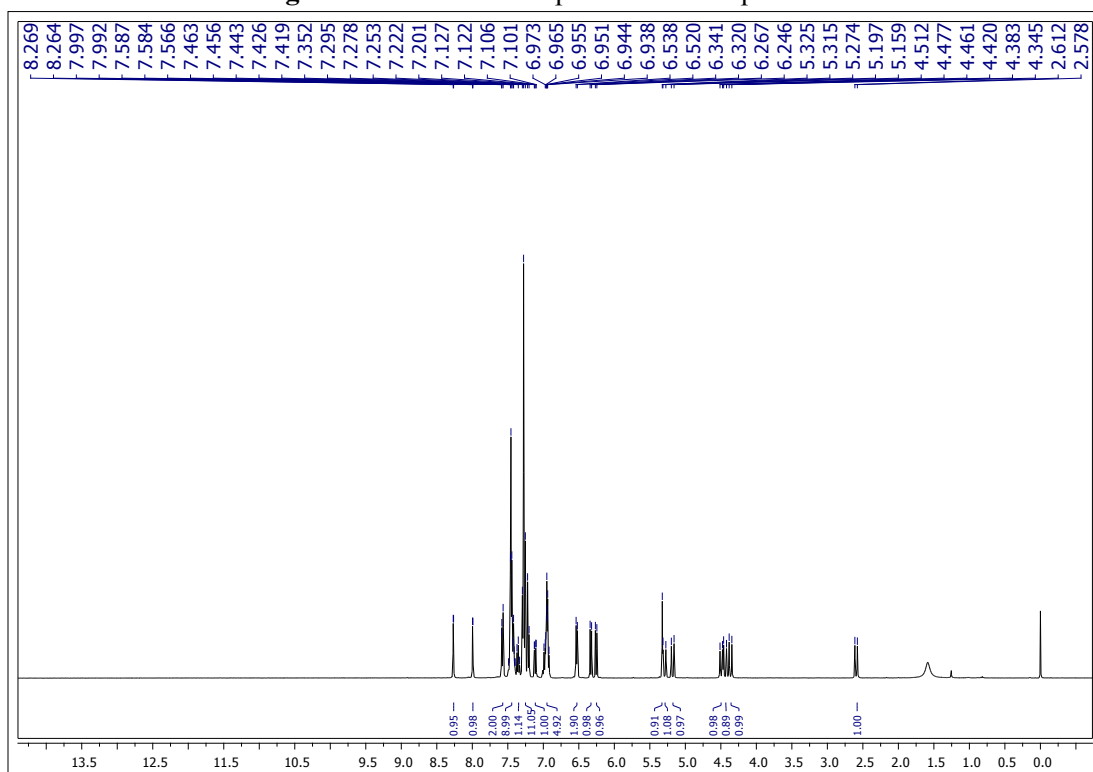

Figure S26. <sup>1</sup>H NMR spectrum of compound 2i

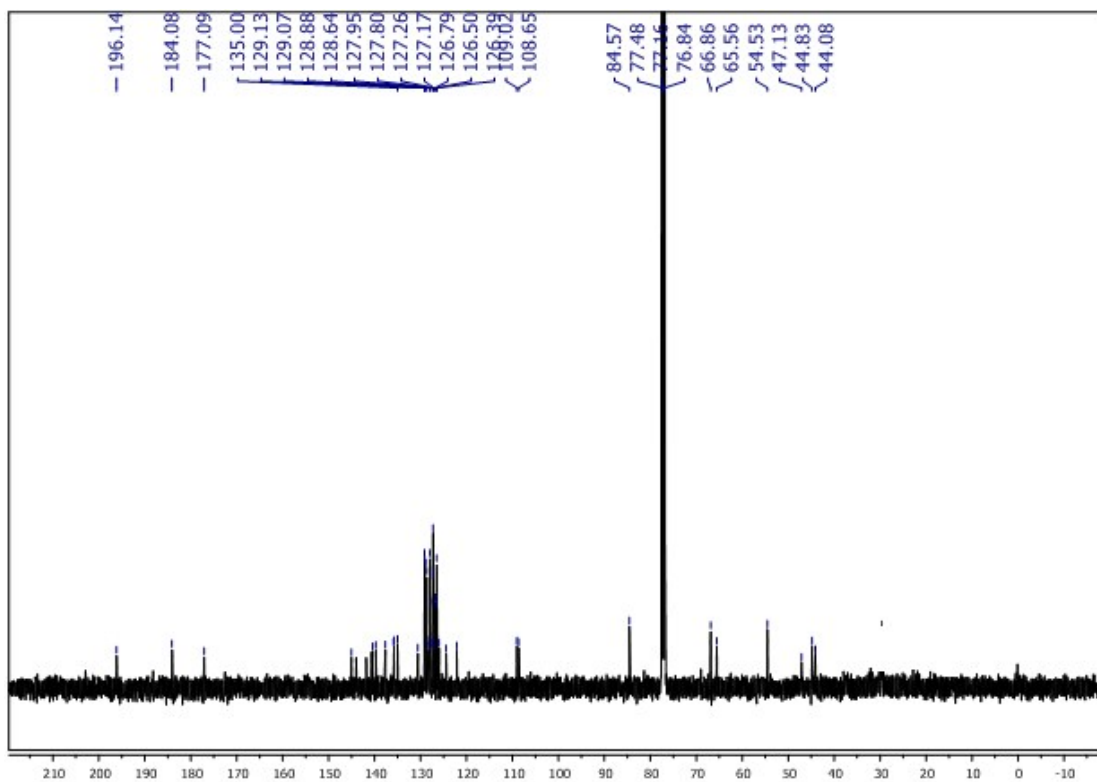

Figure S27.  $^{13}\text{C}$  NMR spectrum of compound **2i**

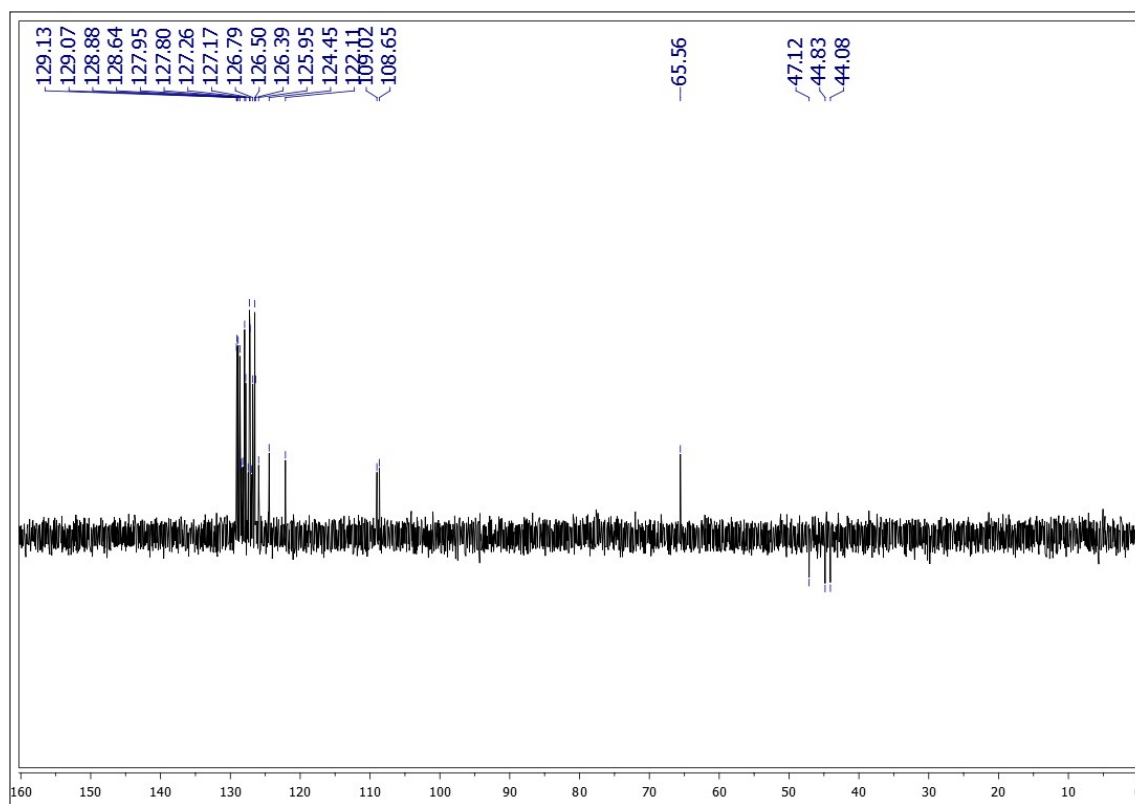

Figure S28. DEPT-135 spectrum of compound **2i**



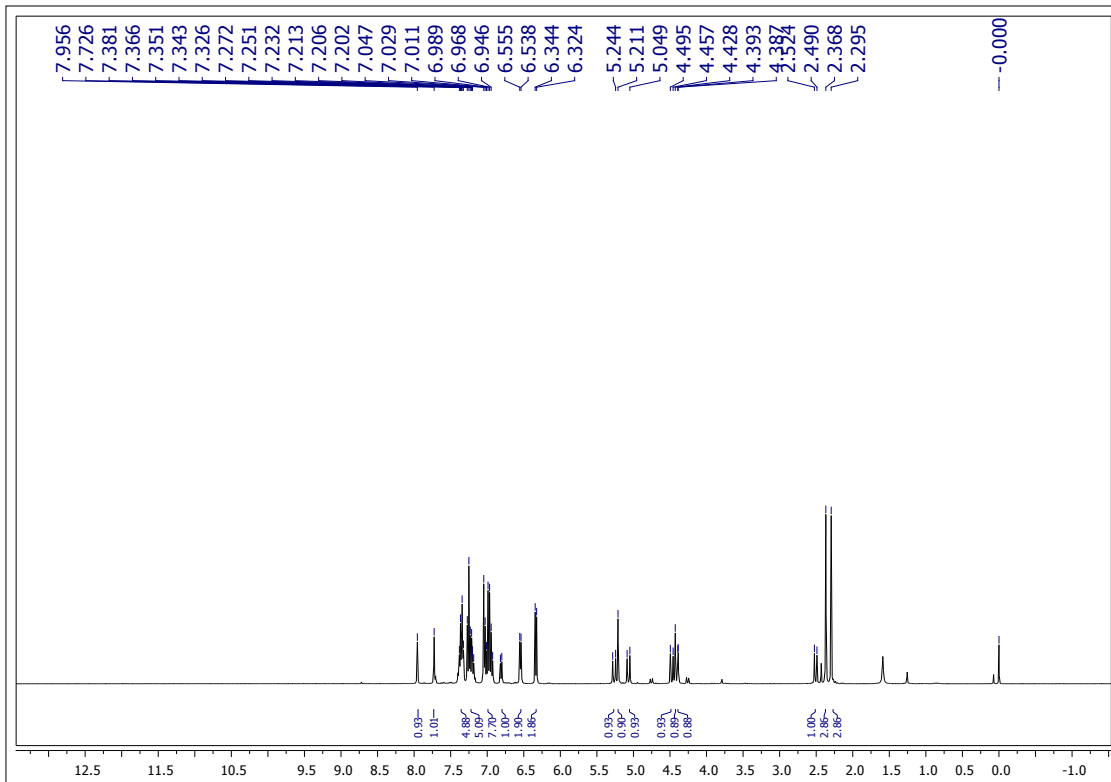

Figure S29. <sup>1</sup>H NMR spectrum of compound **2j**

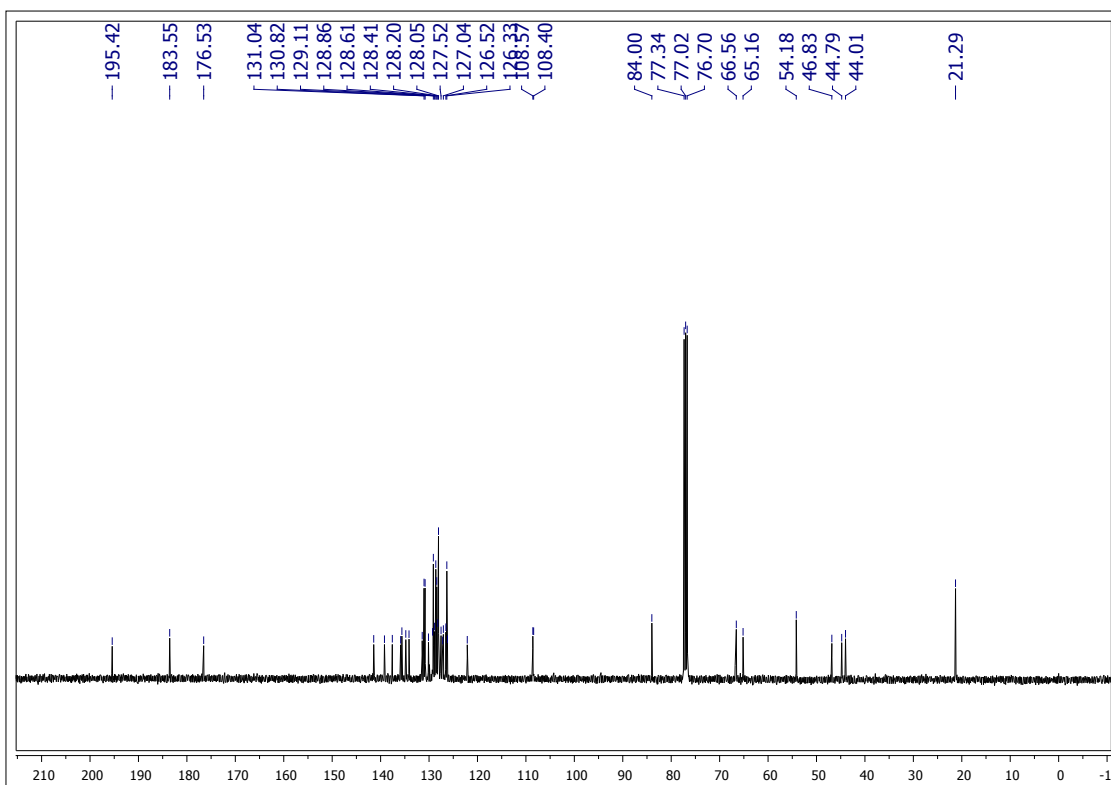

Figure S30. <sup>13</sup>C NMR spectrum of compound **2j**

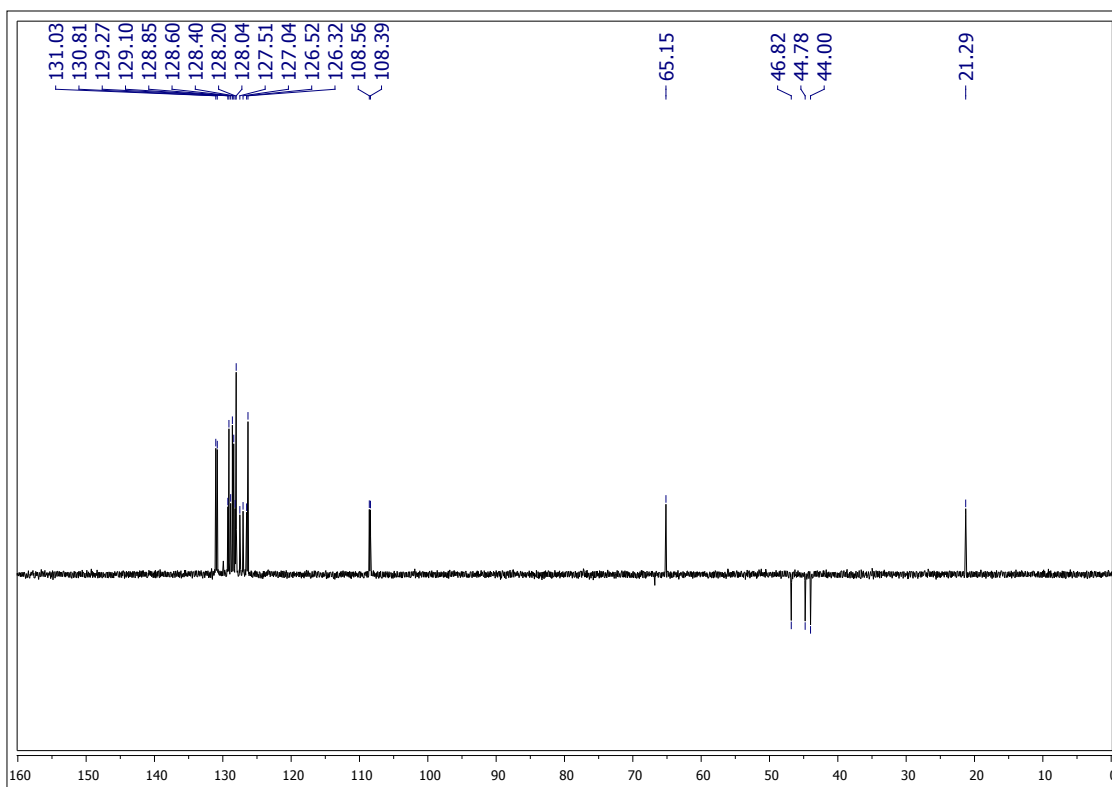

Figure S31. DEPT-135 spectrum of compound 2j

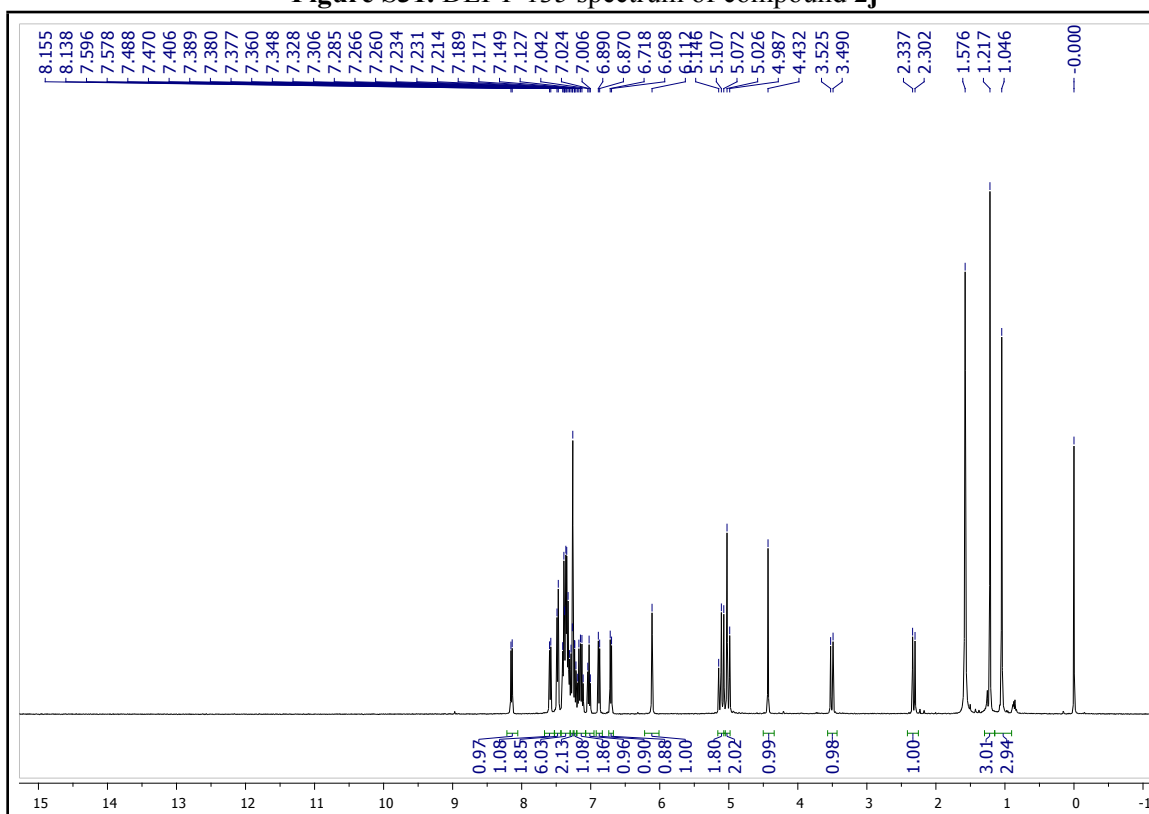

Figure S32. <sup>1</sup>H NMR spectrum of compound 2k

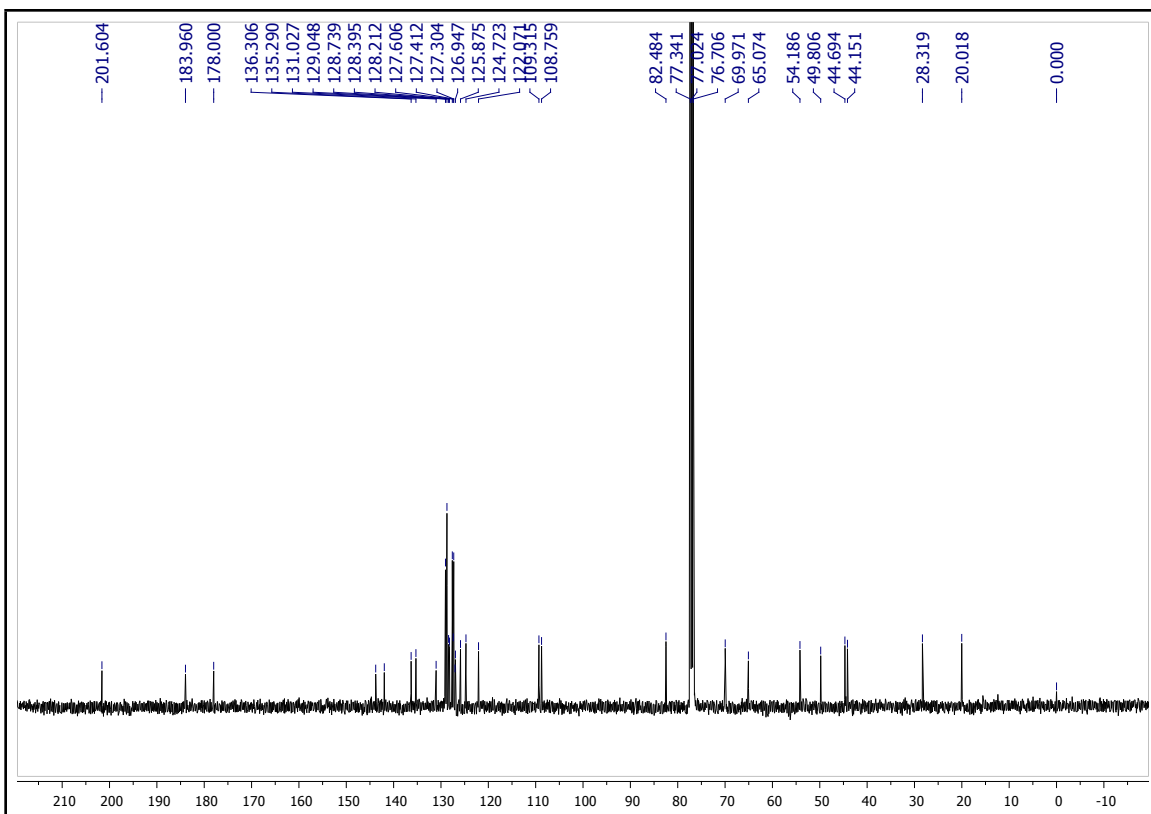

Figure S33.  $^{13}\text{C}$  NMR spectrum of compound **2k**

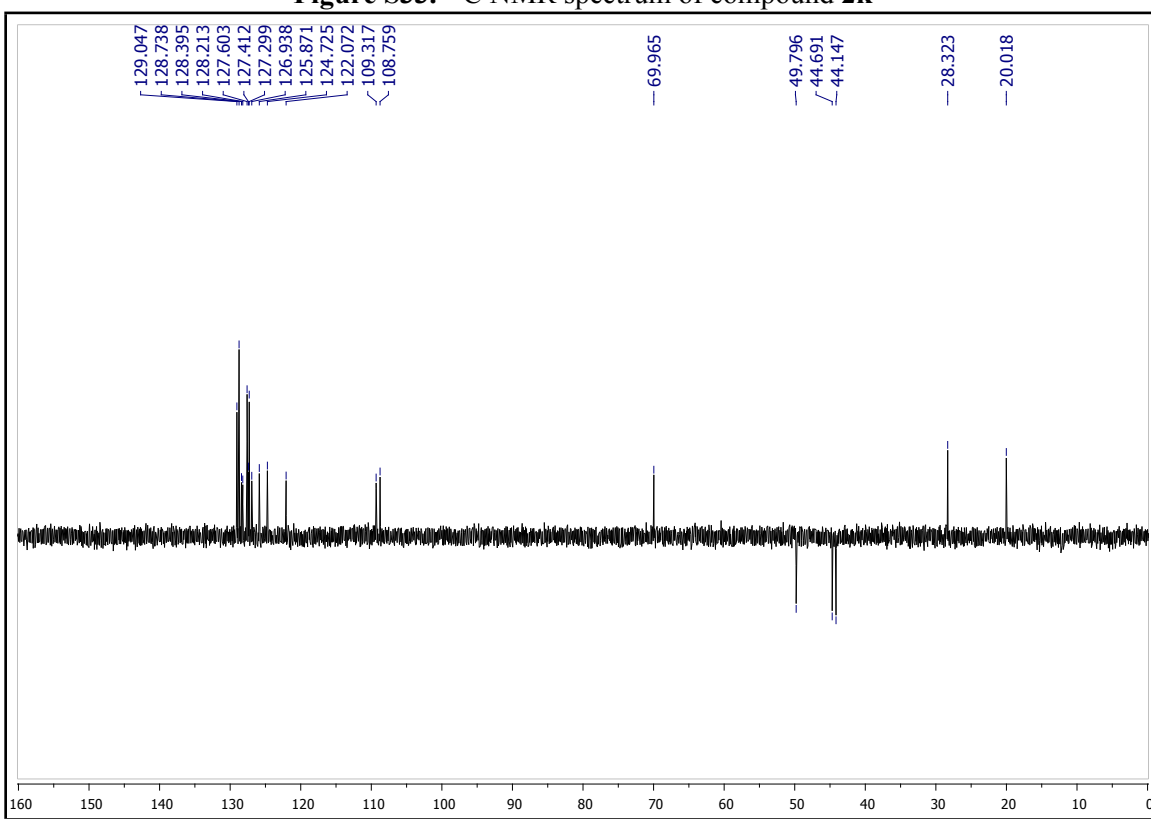

Figure S34. DEPT-135 spectrum of compound **2k**

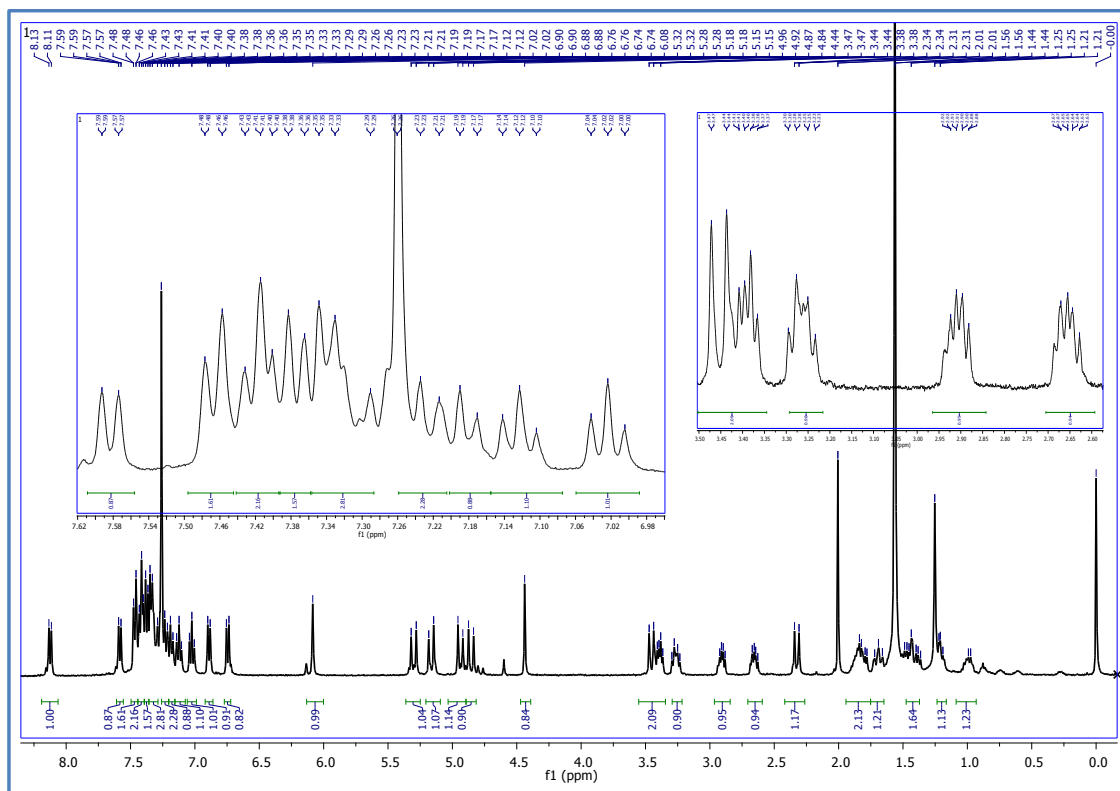

Figure S35.  $^1\text{H}$  NMR spectrum of compound 21

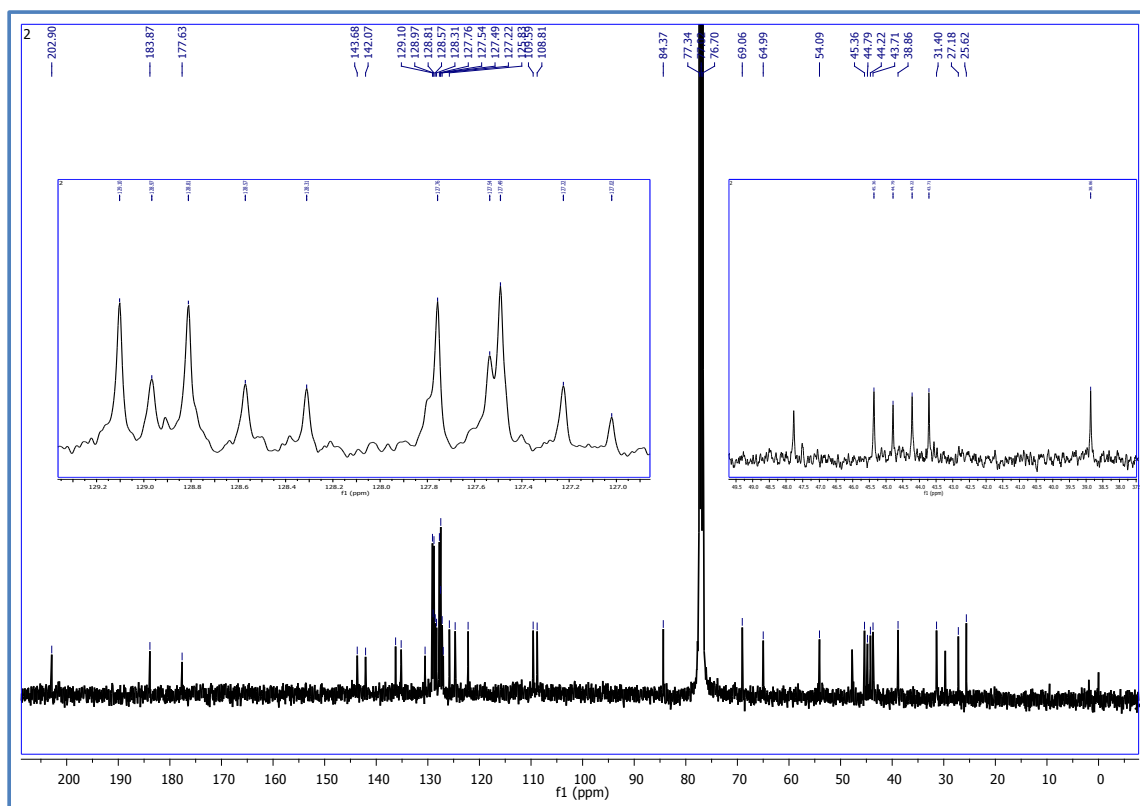

Figure S36.  $^{13}\text{C}$  NMR spectrum of compound 21

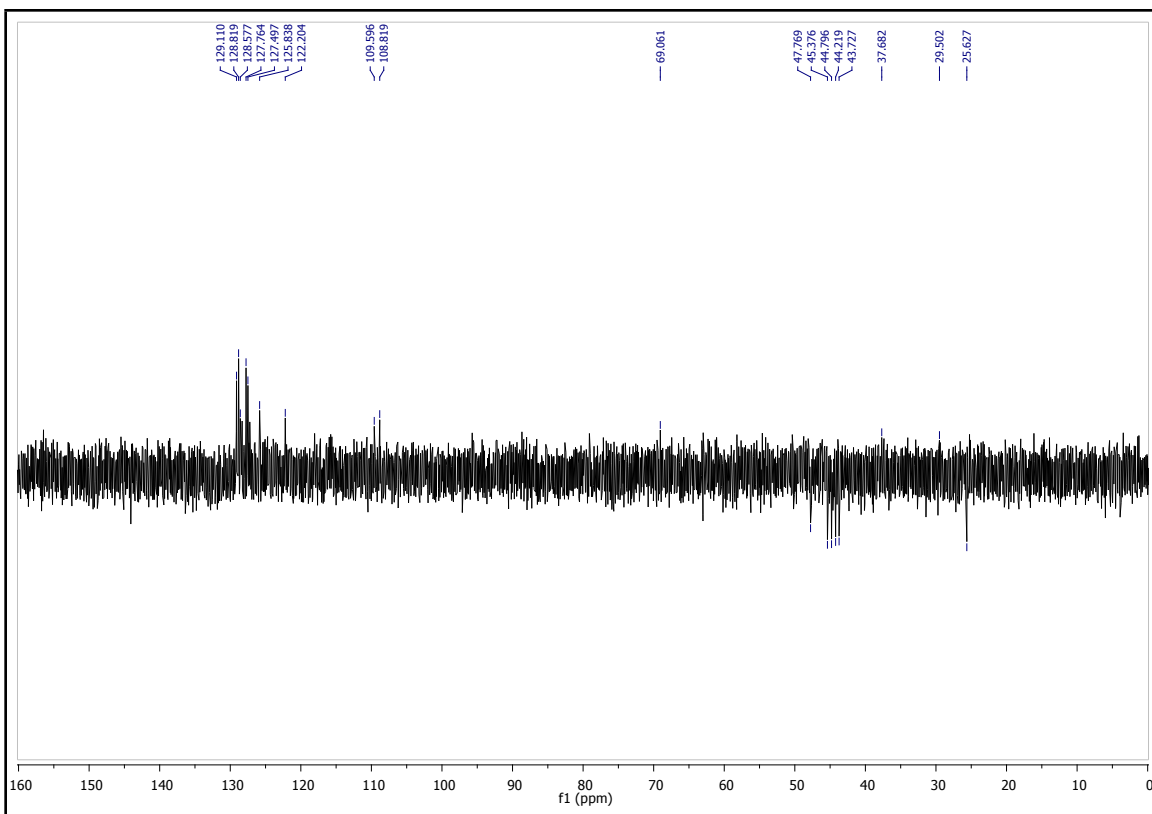

Figure S37. DEPT-135 spectrum of compound 21

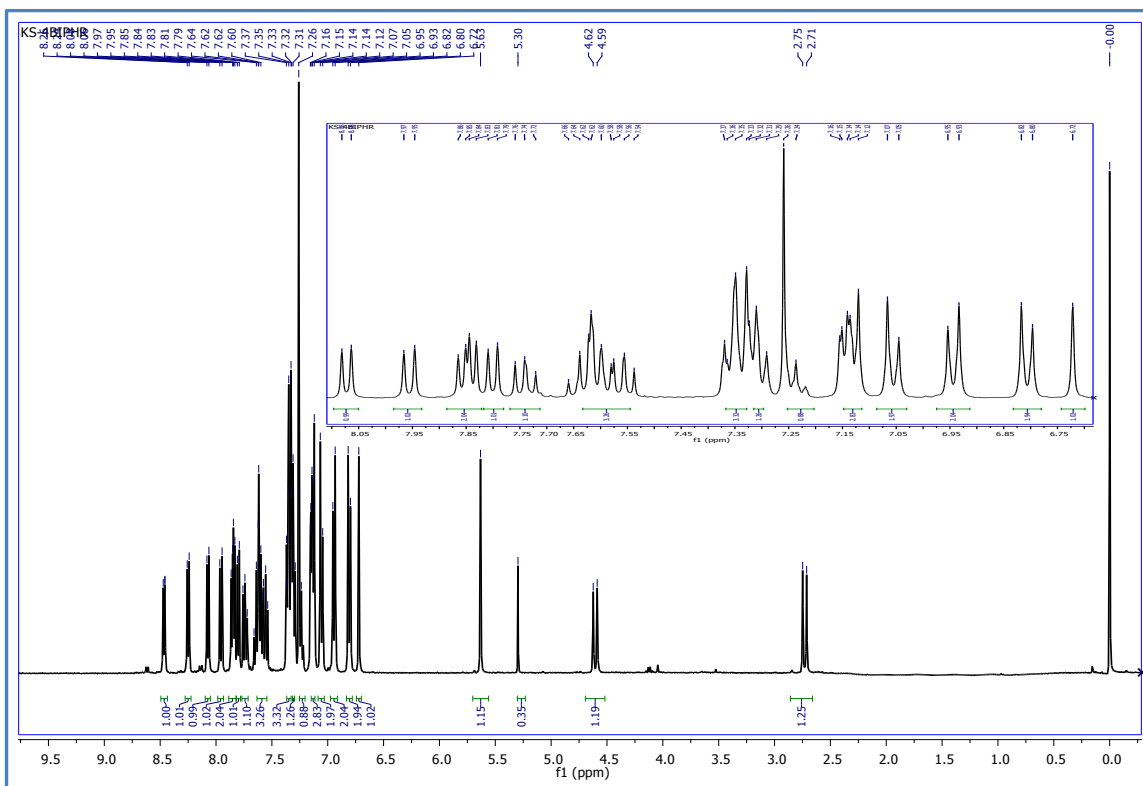

Figure S38. <sup>1</sup>H NMR spectrum of compound 4a

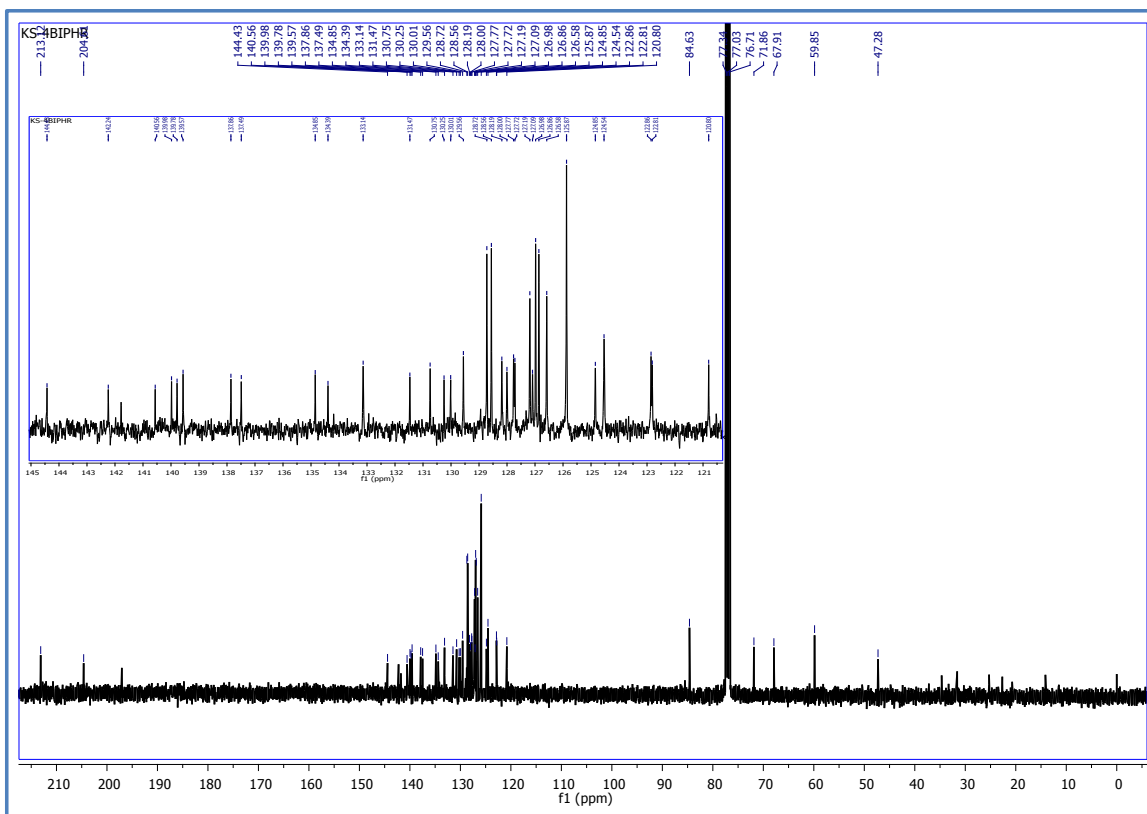

Figure S39.  $^{13}\text{C}$  NMR spectrum of compound 4a

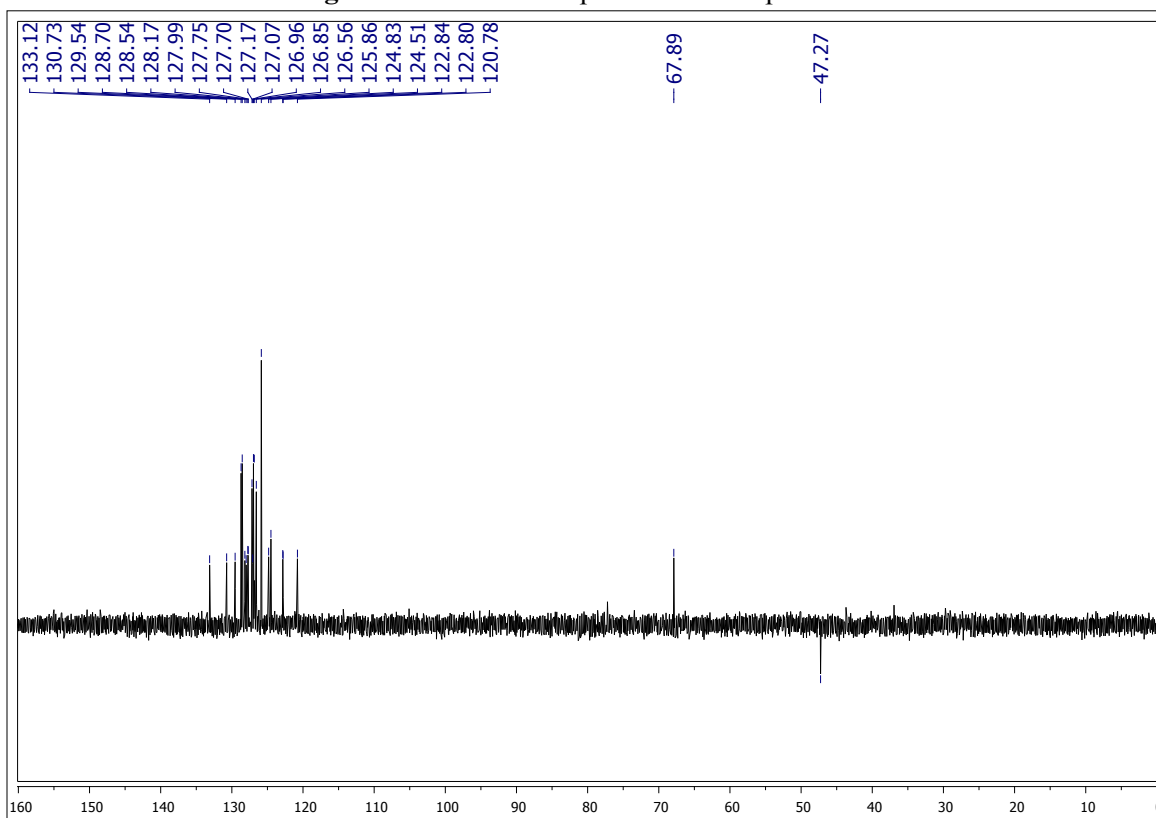

Figure S40. DEPT-135 spectrum of compound 4a

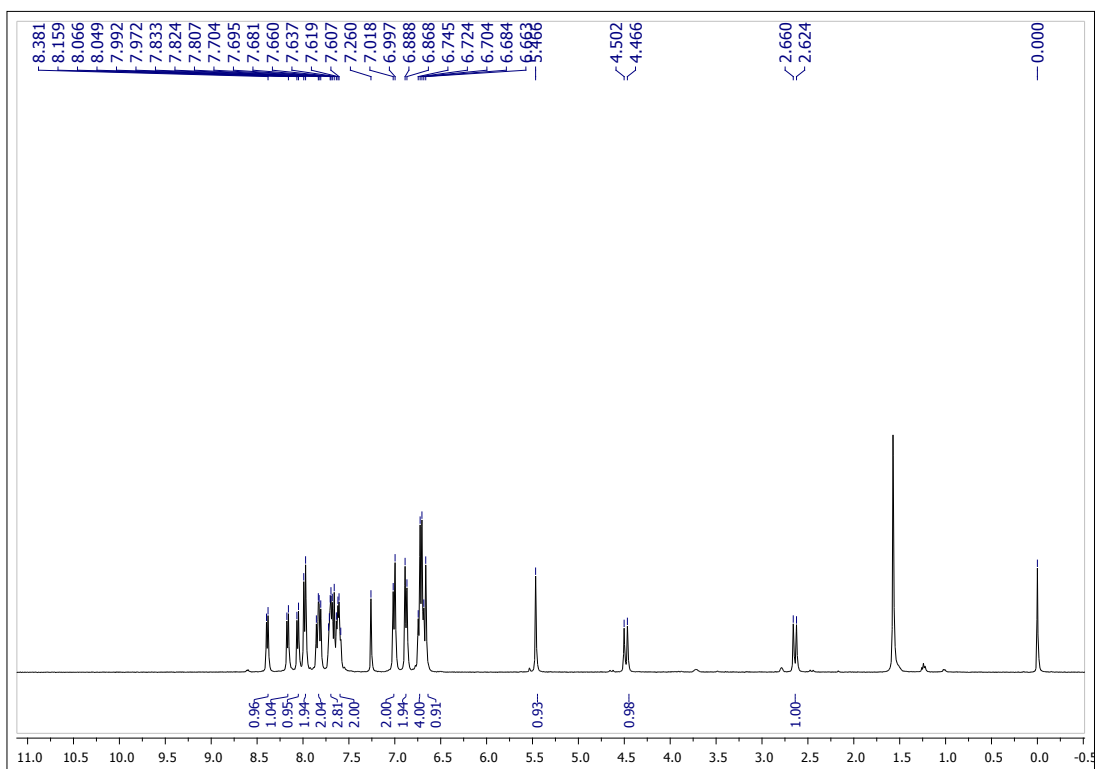

Figure S41.  $^1\text{H}$  NMR spectrum of compound **4b**

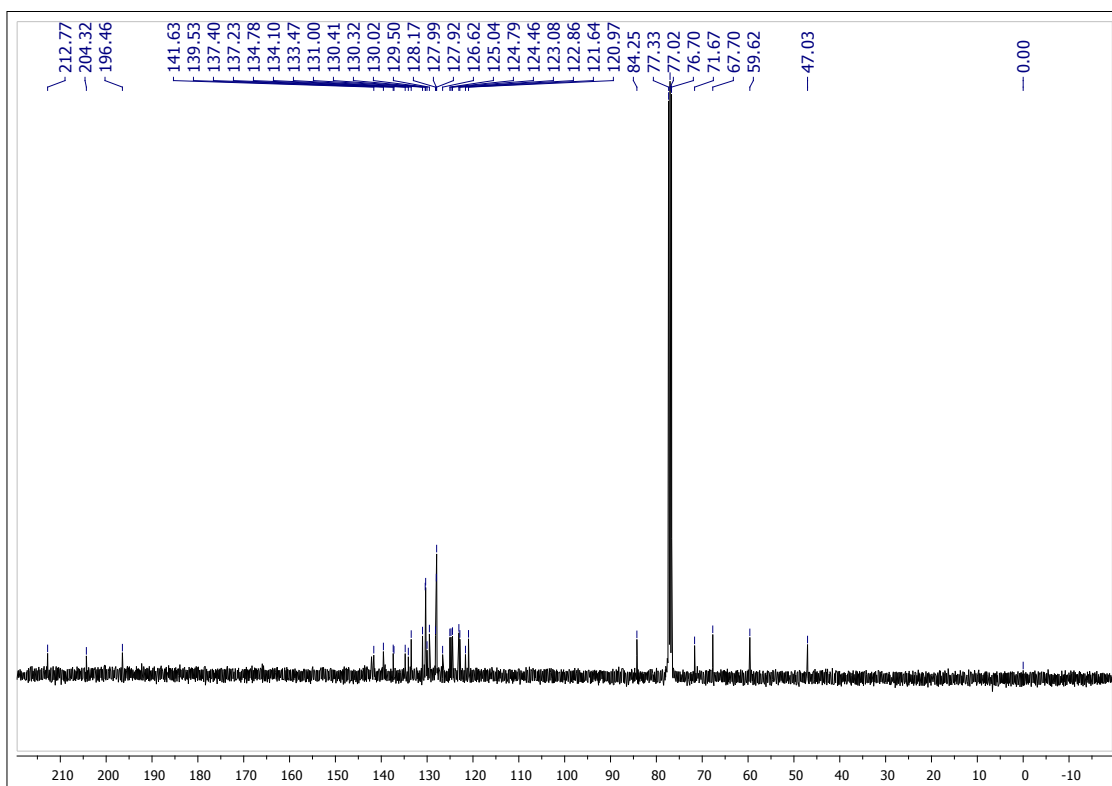

Figure S42.  $^{13}\text{C}$  NMR spectrum of compound **4b**

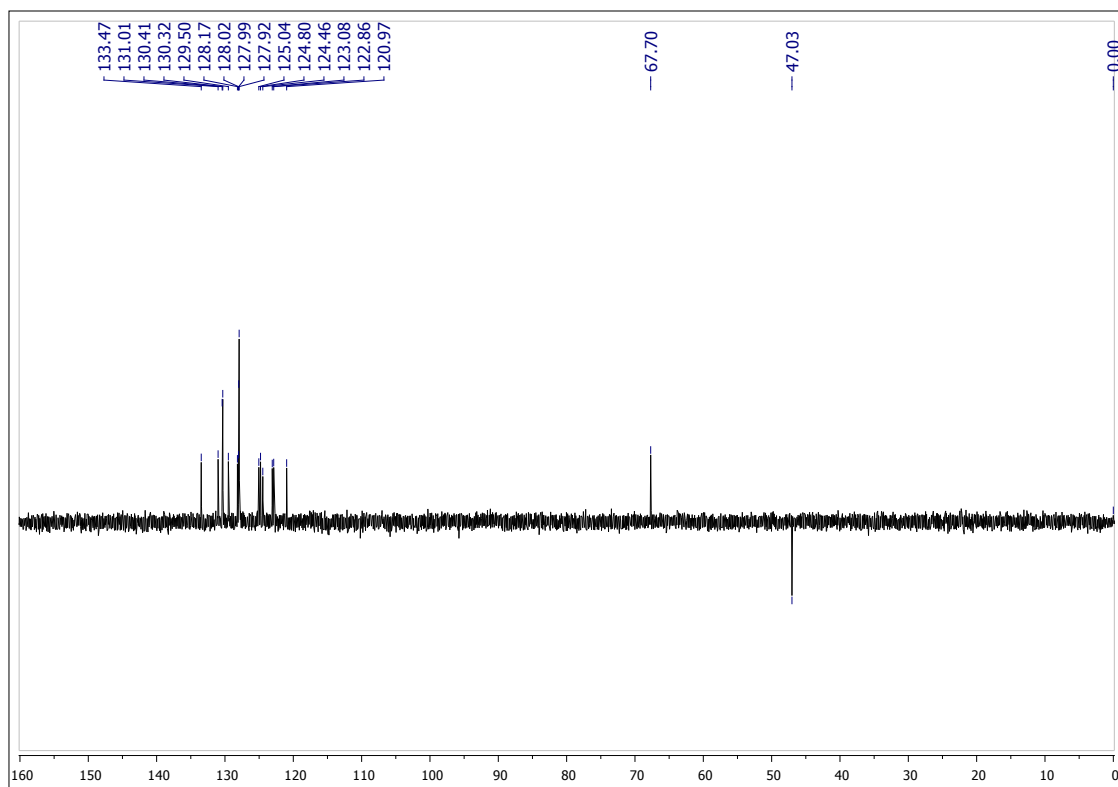

**Figure S43.** DEPT-135 spectrum of compound **4b**

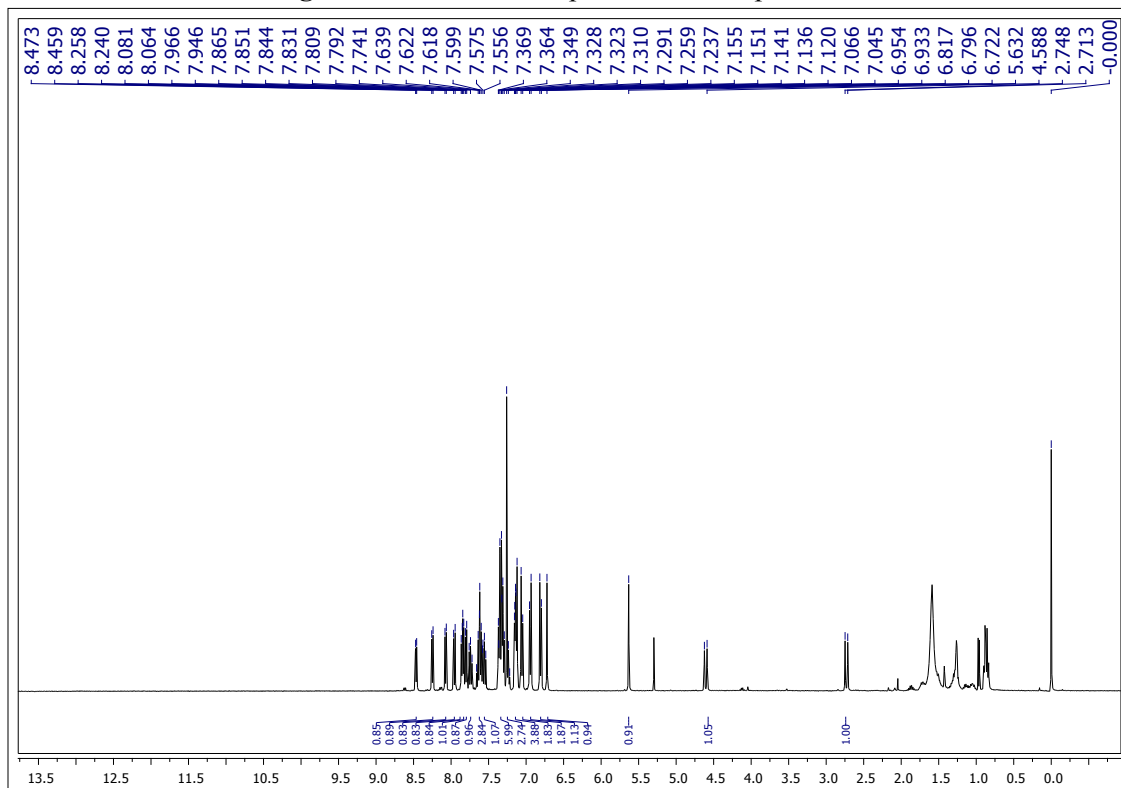

**Figure S44.** <sup>1</sup>H NMR spectrum of compound **4c**



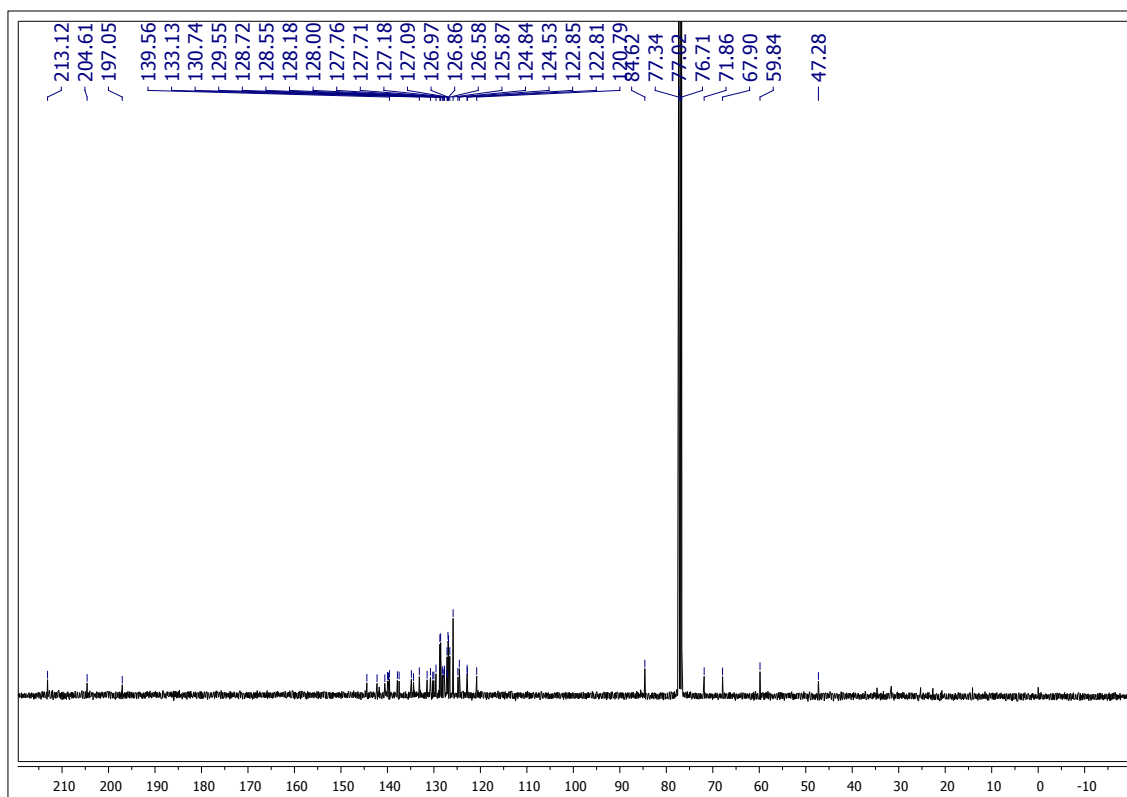

Figure S45.  $^{13}\text{C}$  NMR spectrum of compound **4c**

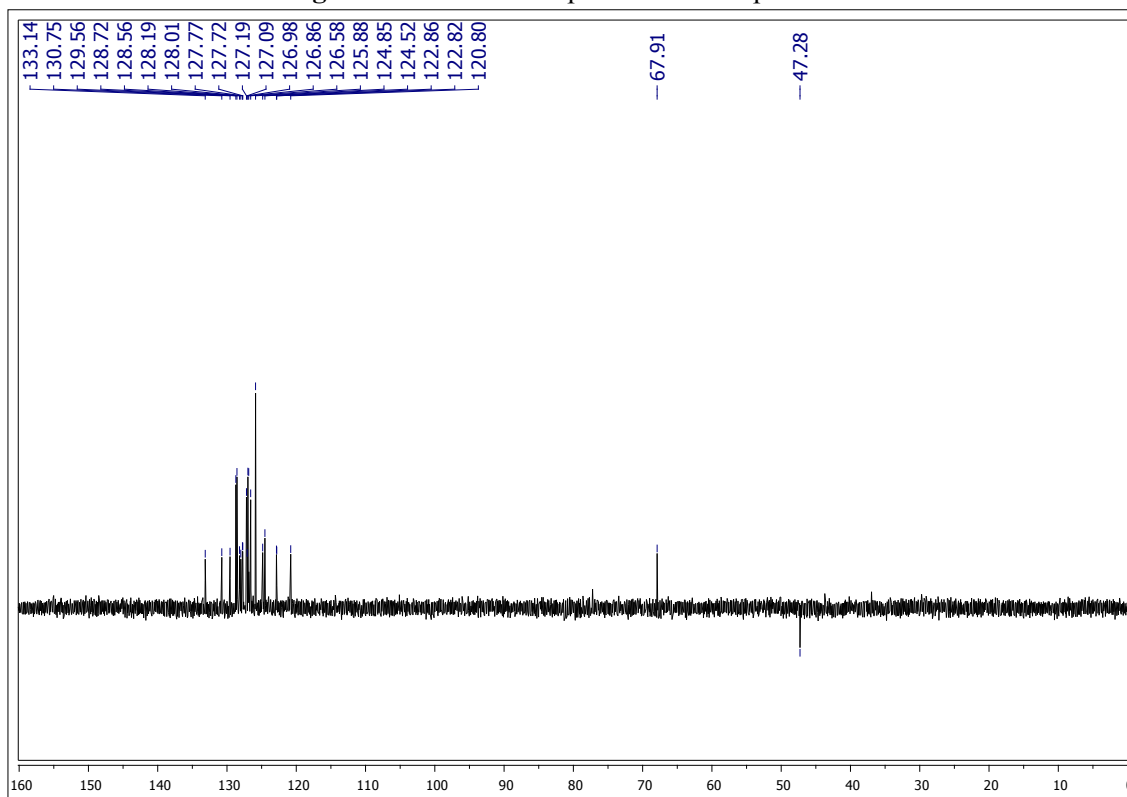

Figure S46. DEPT-135 spectrum of compound **4c**

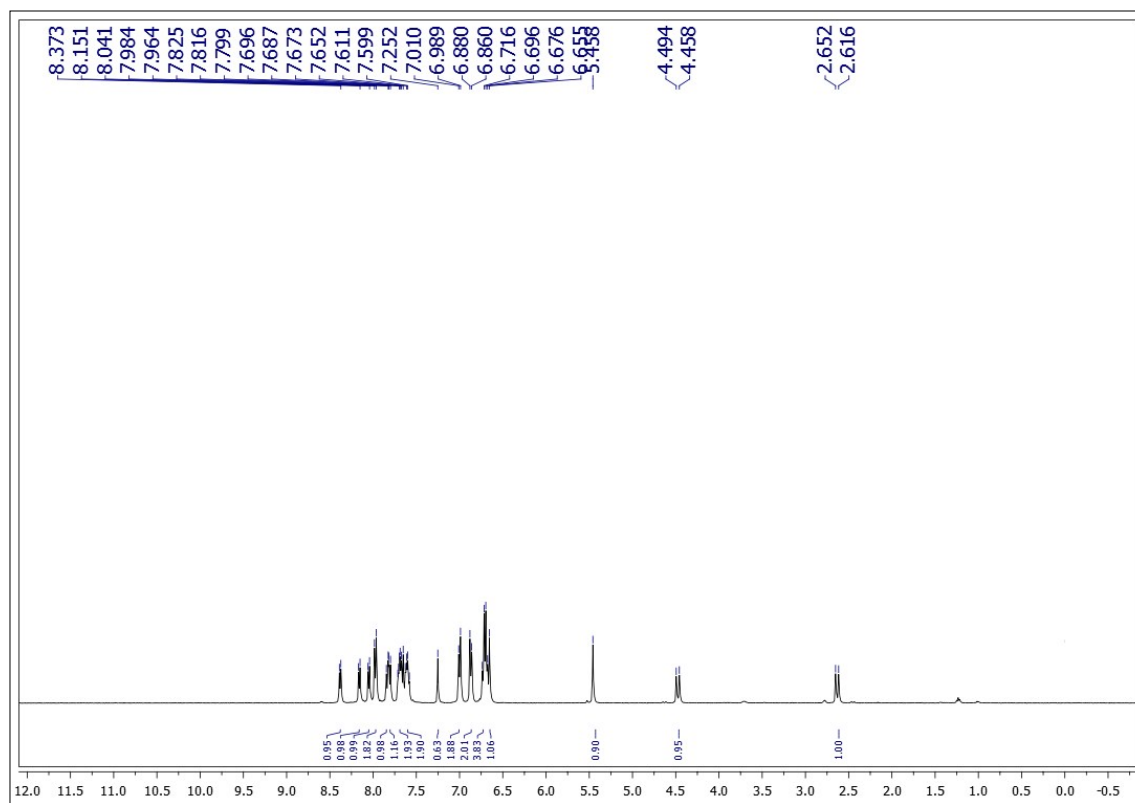

Figure S47. <sup>1</sup>H NMR spectrum of compound 4d

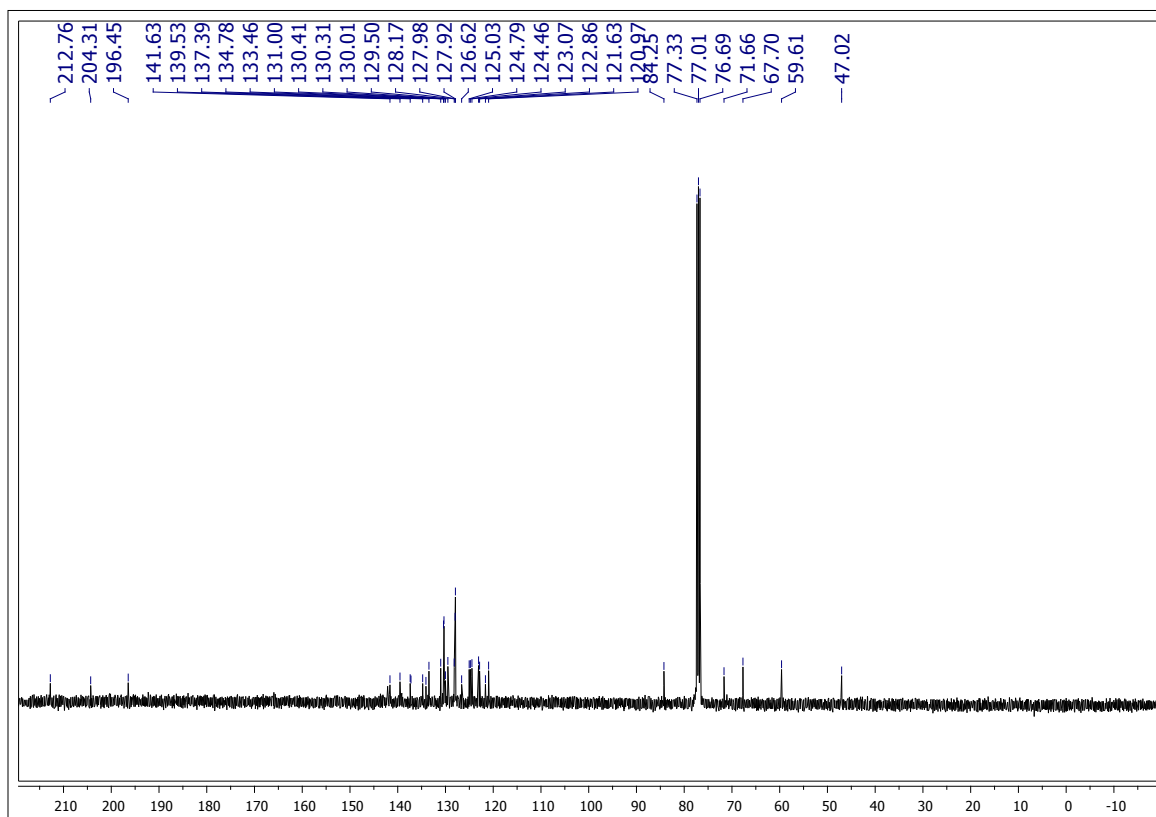

Figure S48. <sup>13</sup>C NMR spectrum of compound 4d

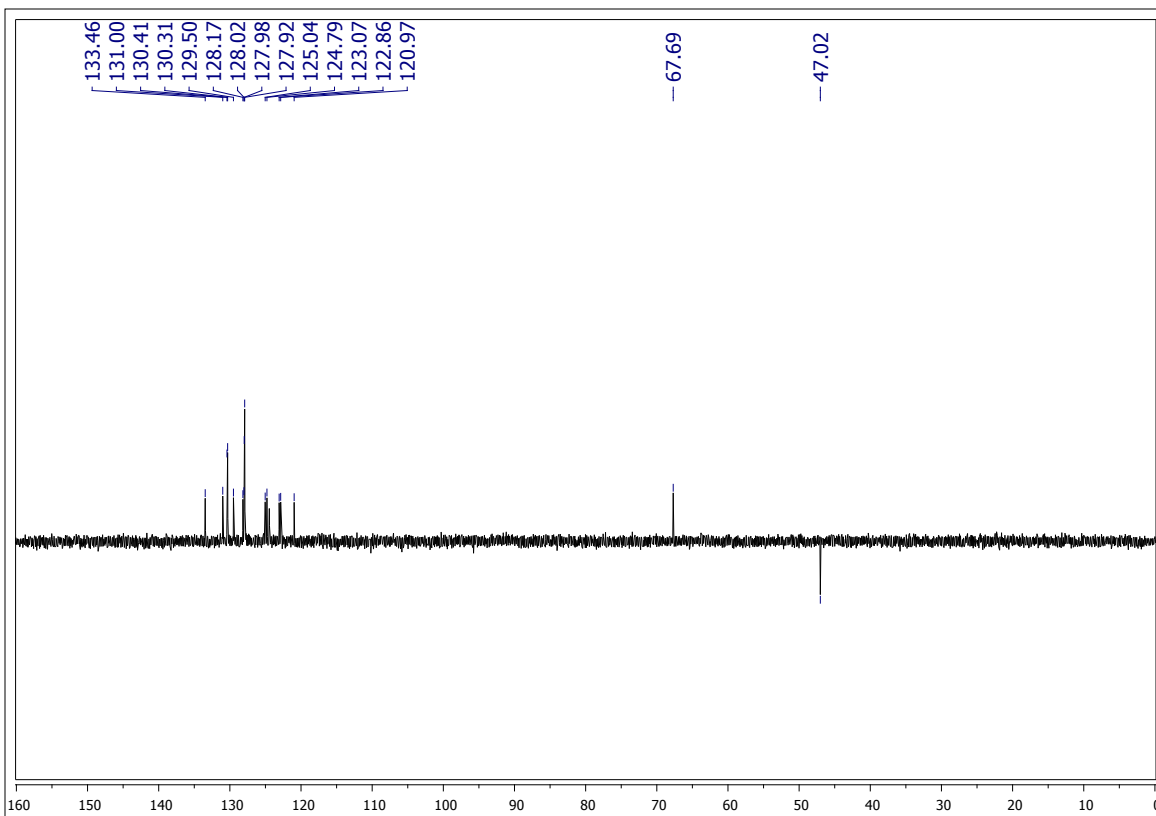

Figure S49. DEPT-135 spectrum of compound 4d

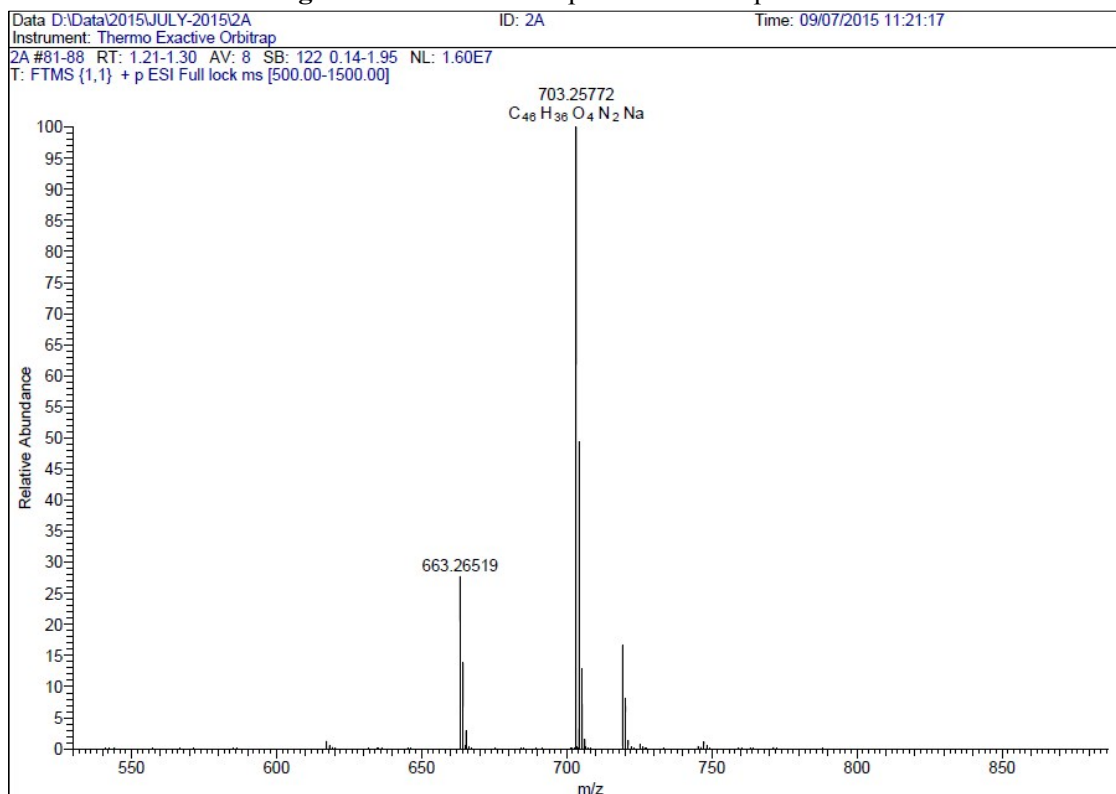

Figure S50. Mass spectrum of 2a

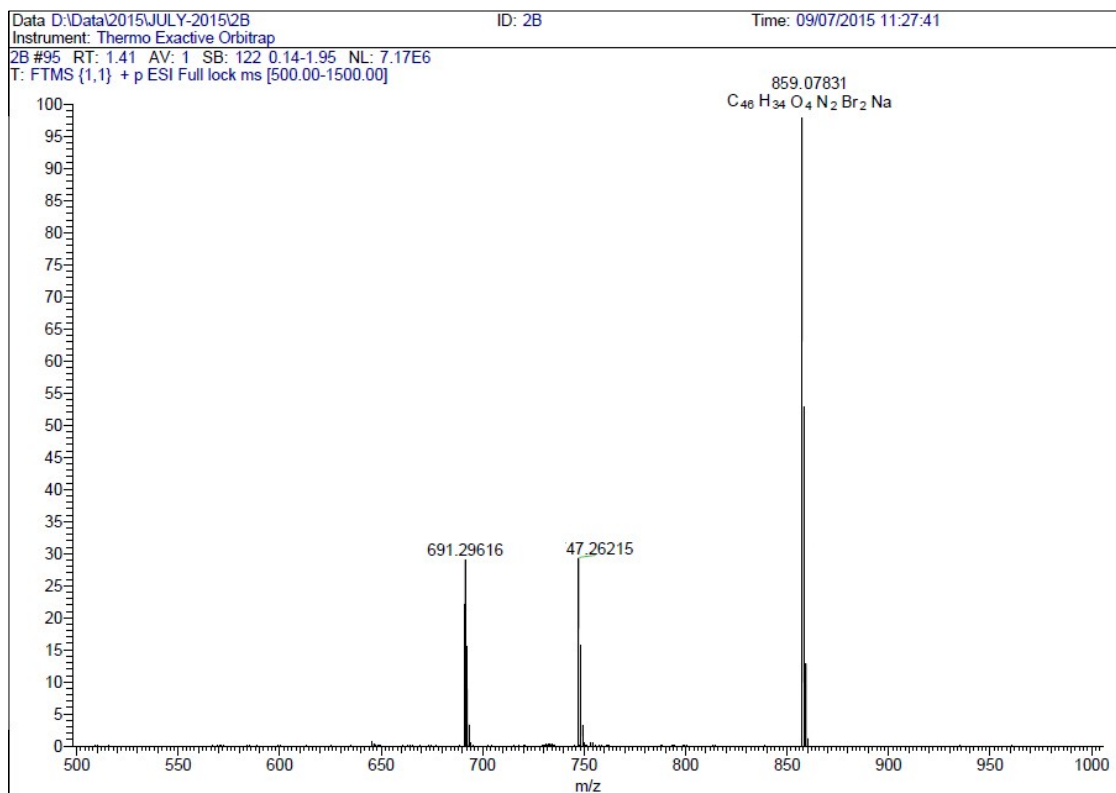

Figure S51. Mass spectrum of 2b

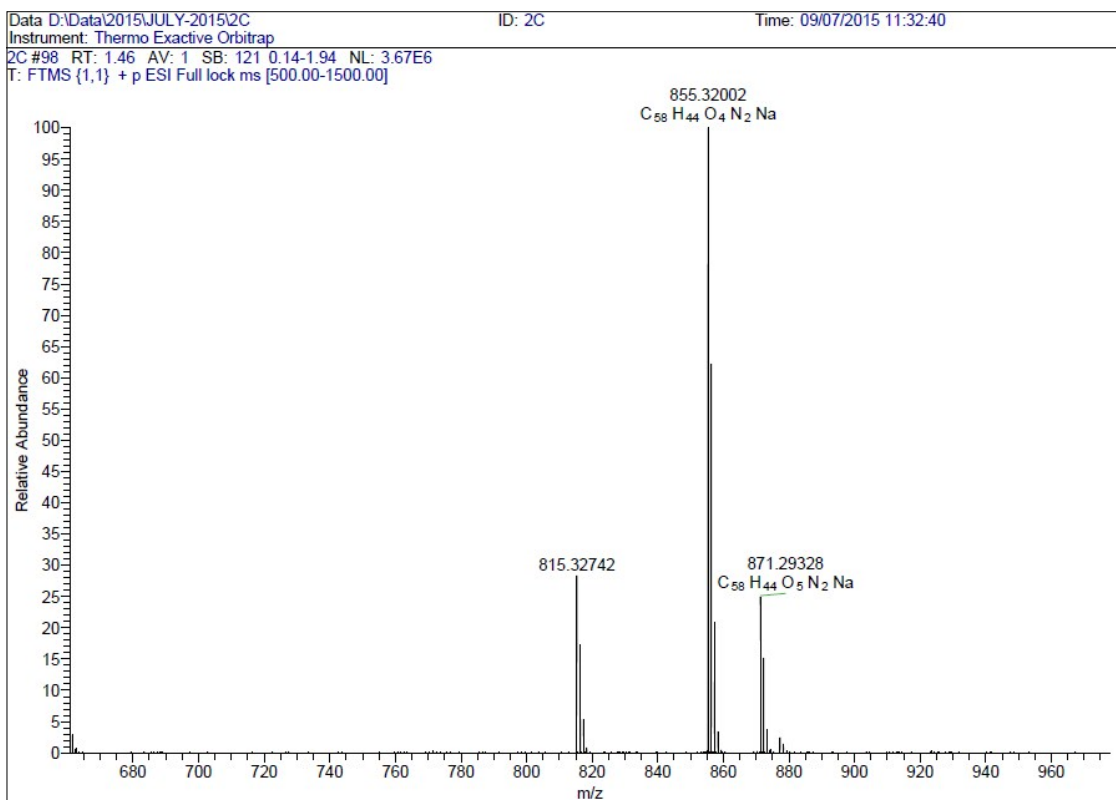

Figure S52. Mass spectrum of 2c

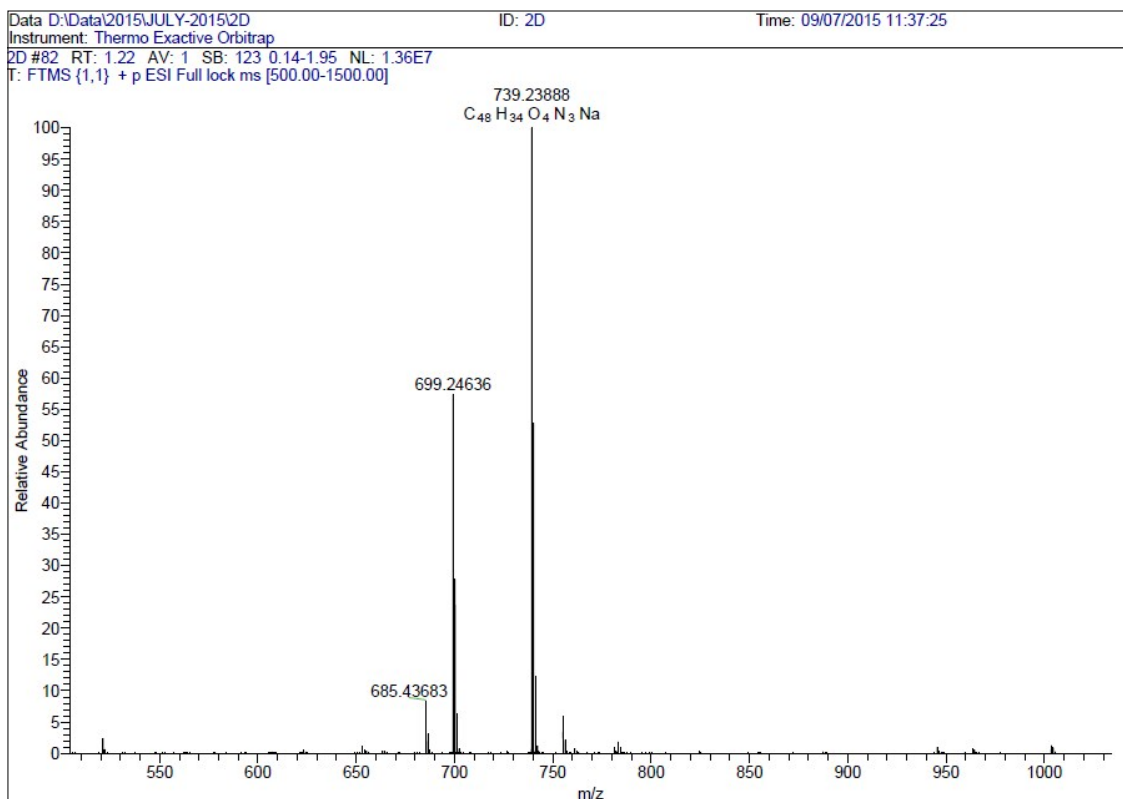

Figure S53. Mass spectrum of 2d

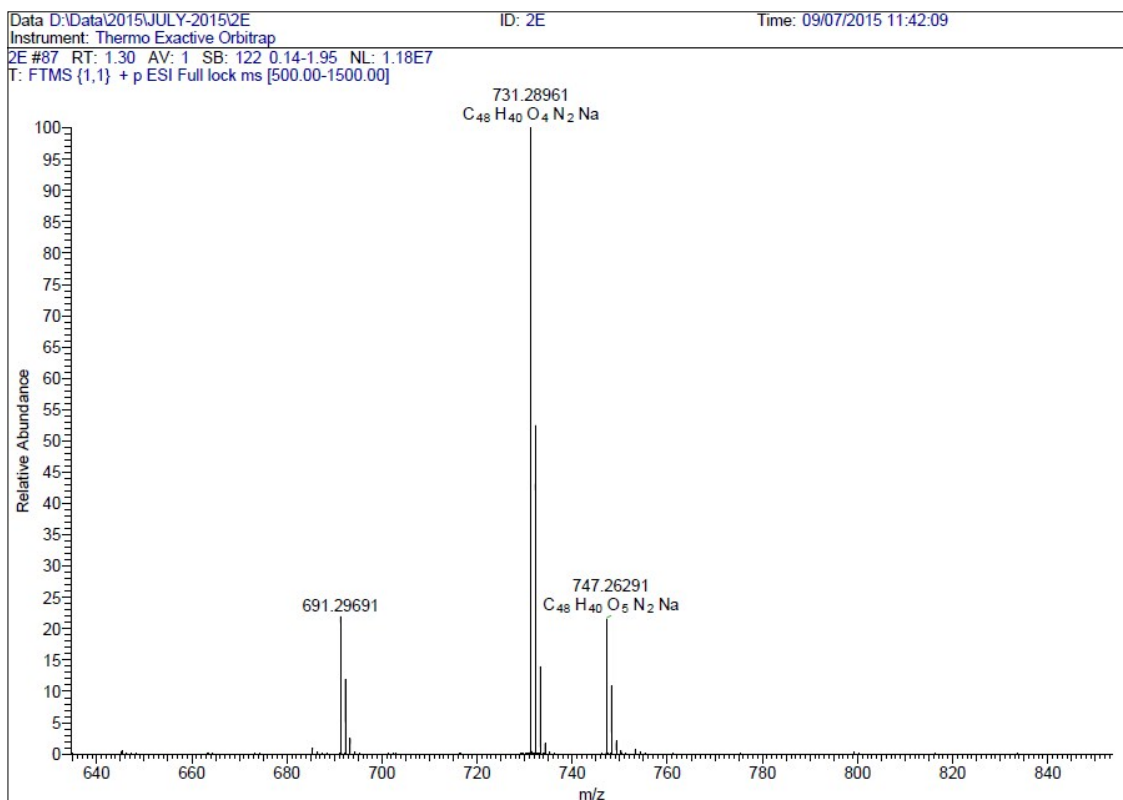

Figure S54. Mass spectrum of 2e

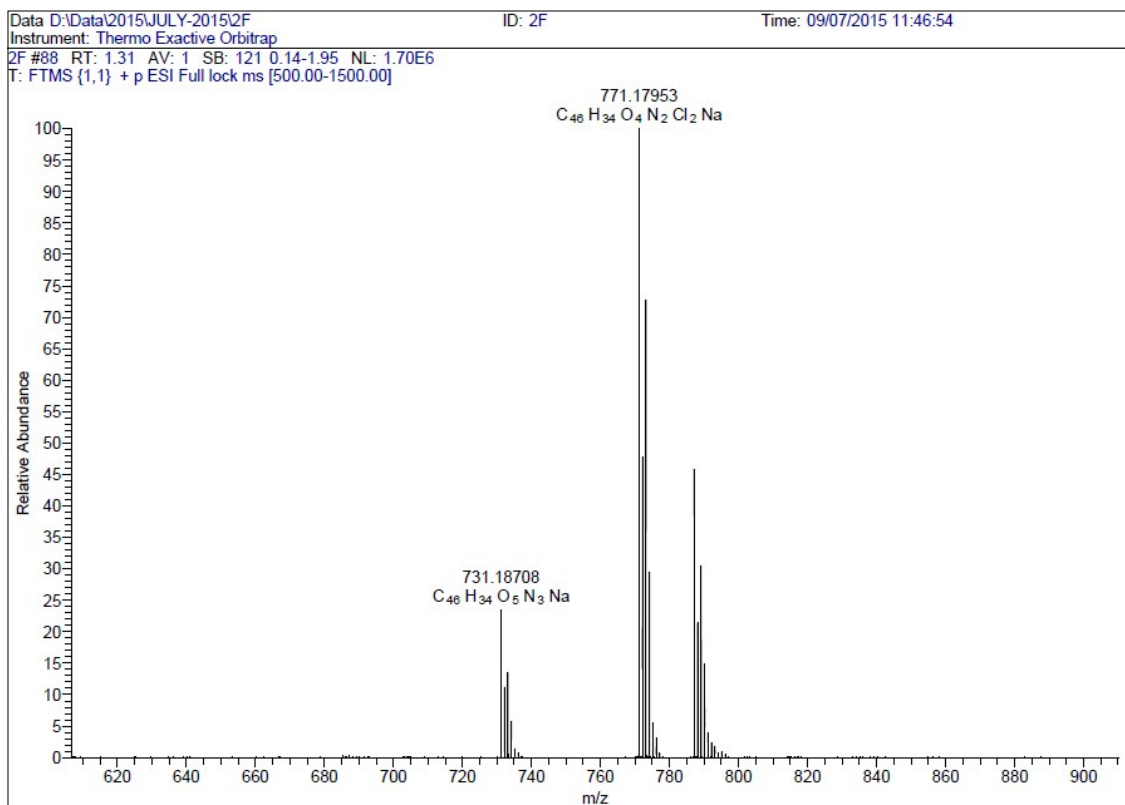

Figure S55. Mass spectrum of 2f

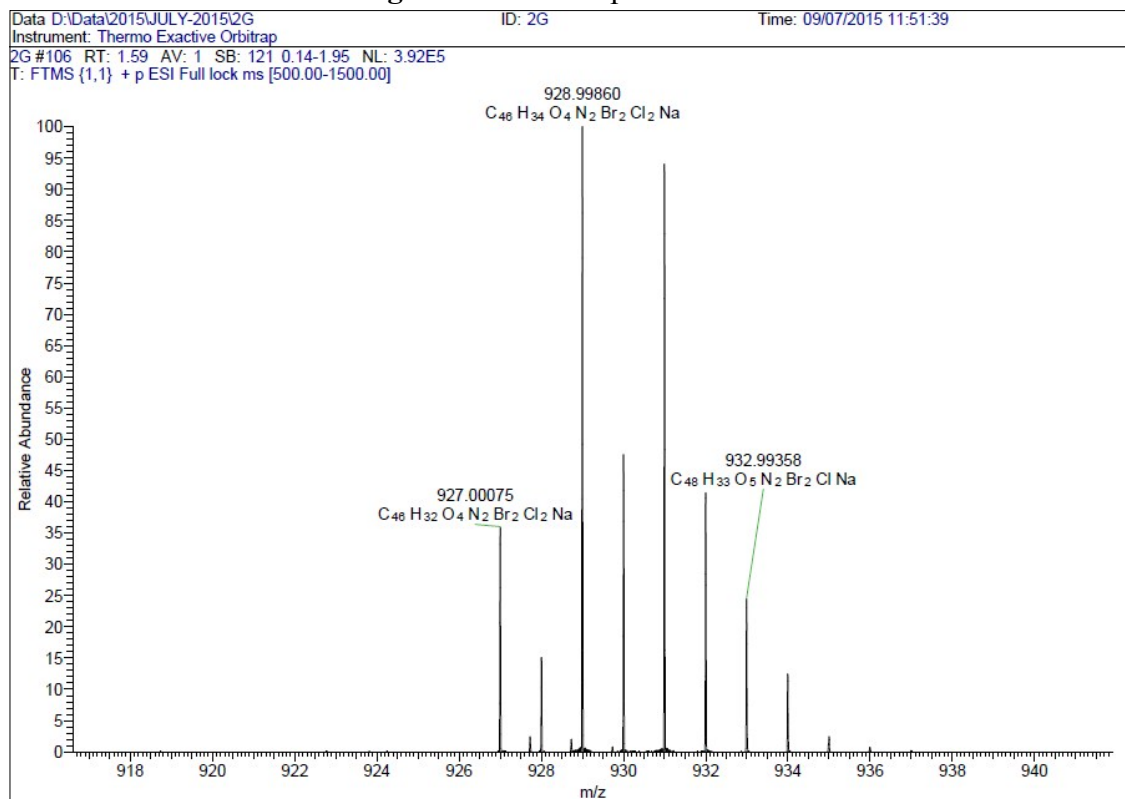

Figure S56. Mass spectrum of 2g

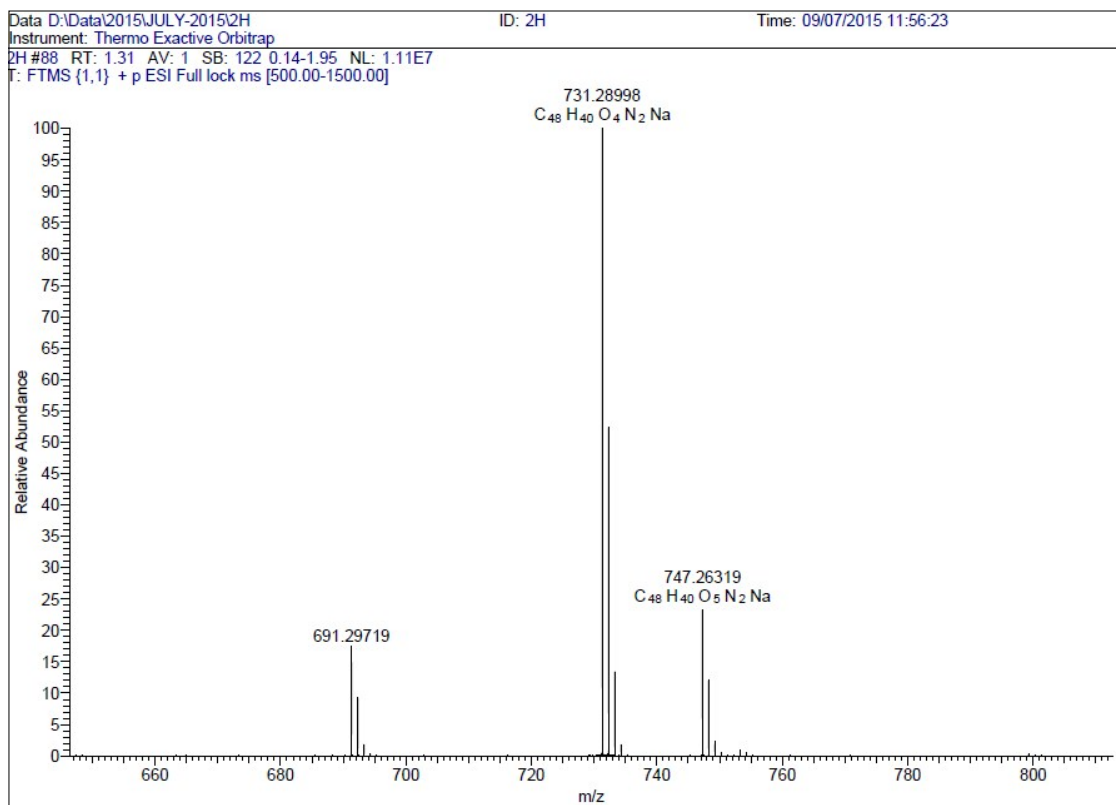

Figure S57. Mass spectrum of 2h

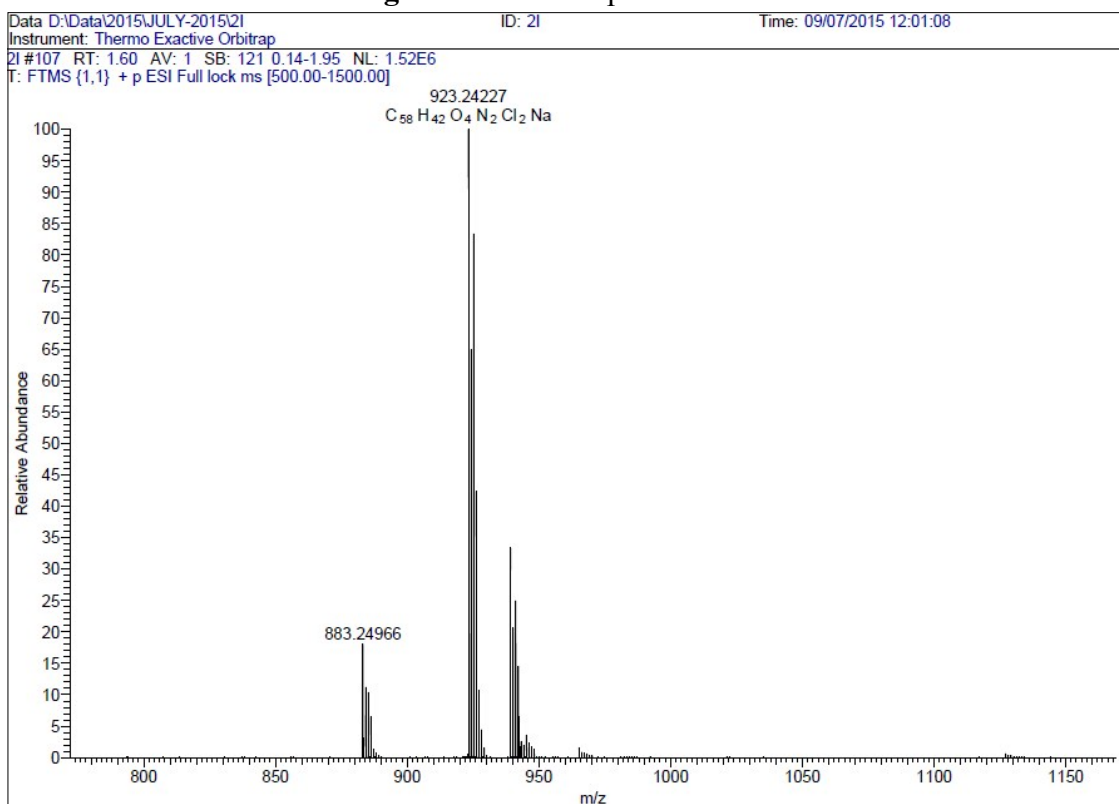

Figure S58. Mass spectrum of 2i

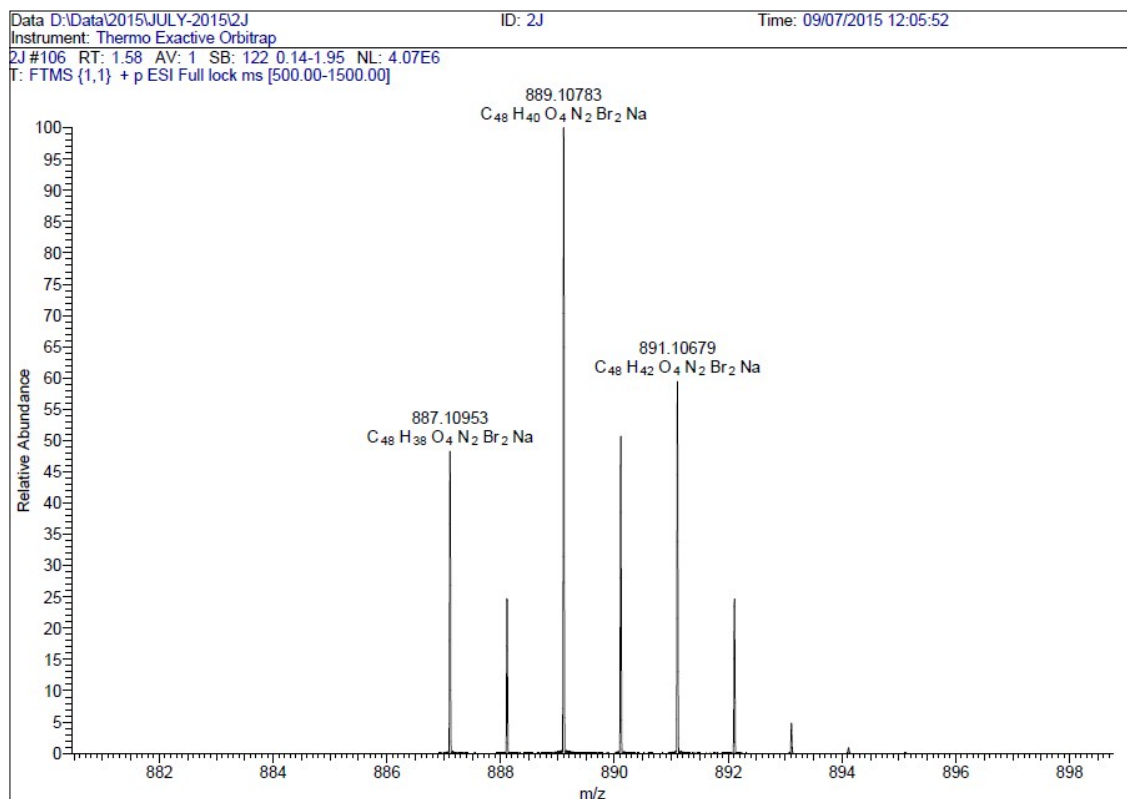

Figure S59. Mass spectrum of 2j

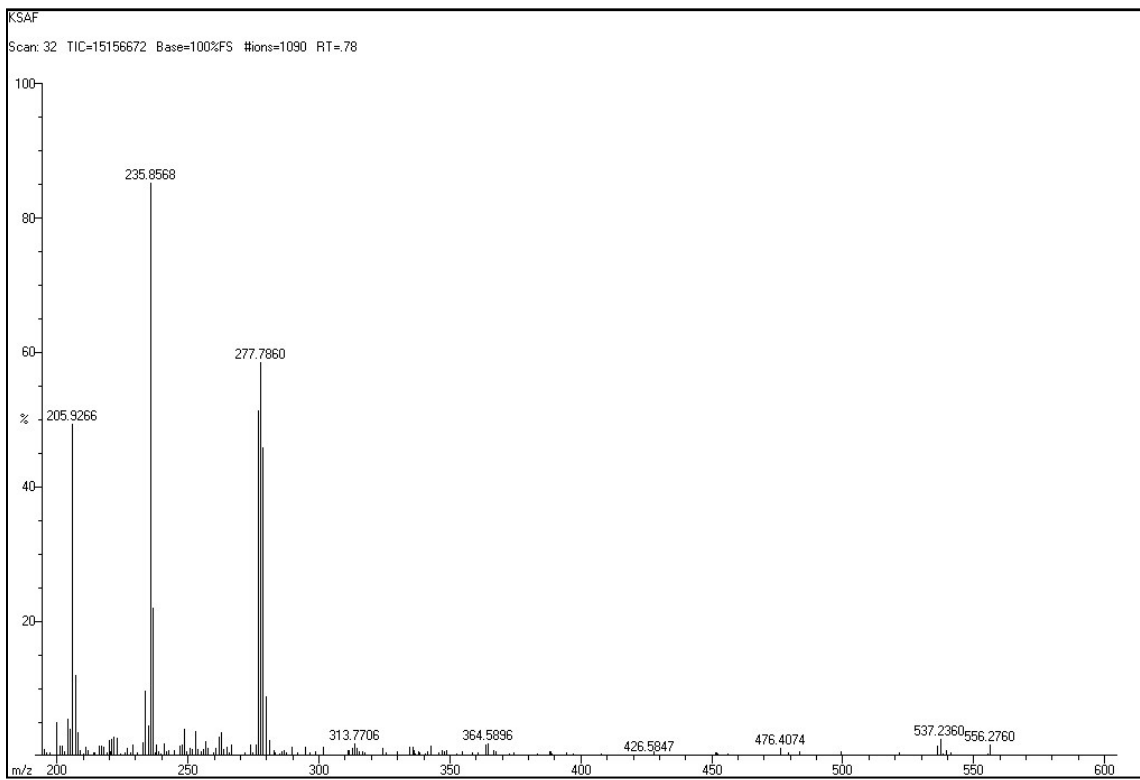

Figure S60. Mass spectrum of 2k



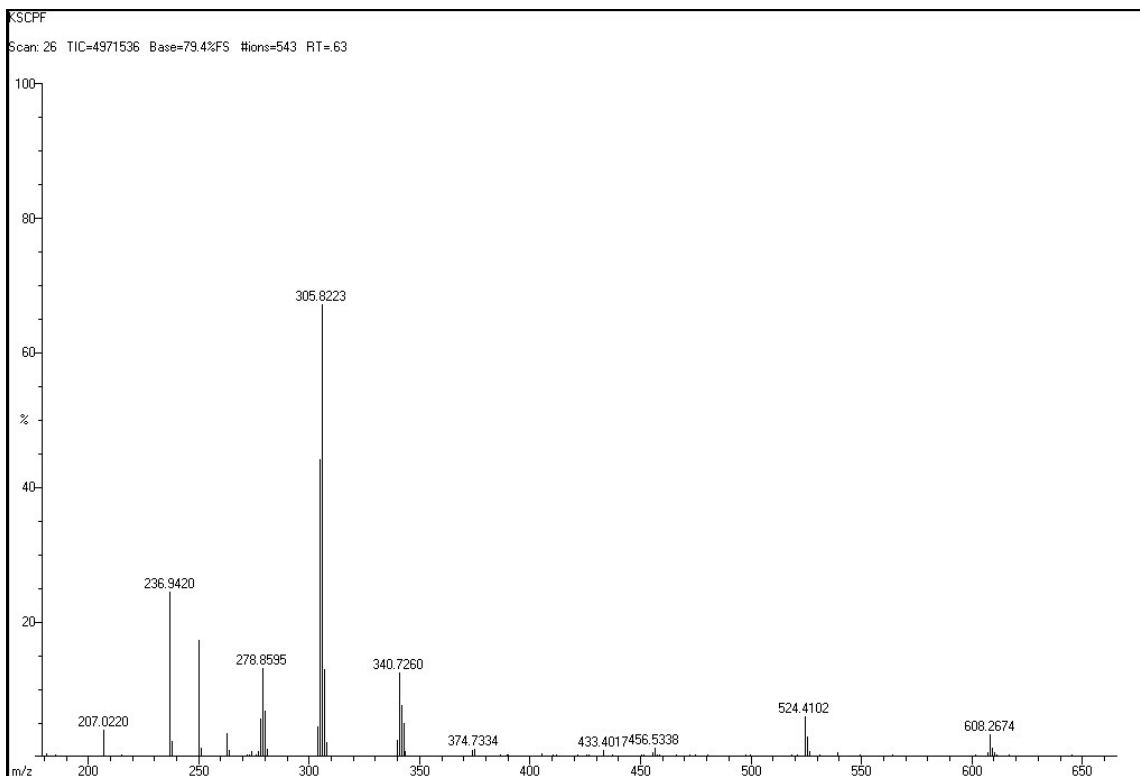

**Figure S61. Mass spectrum of 21**

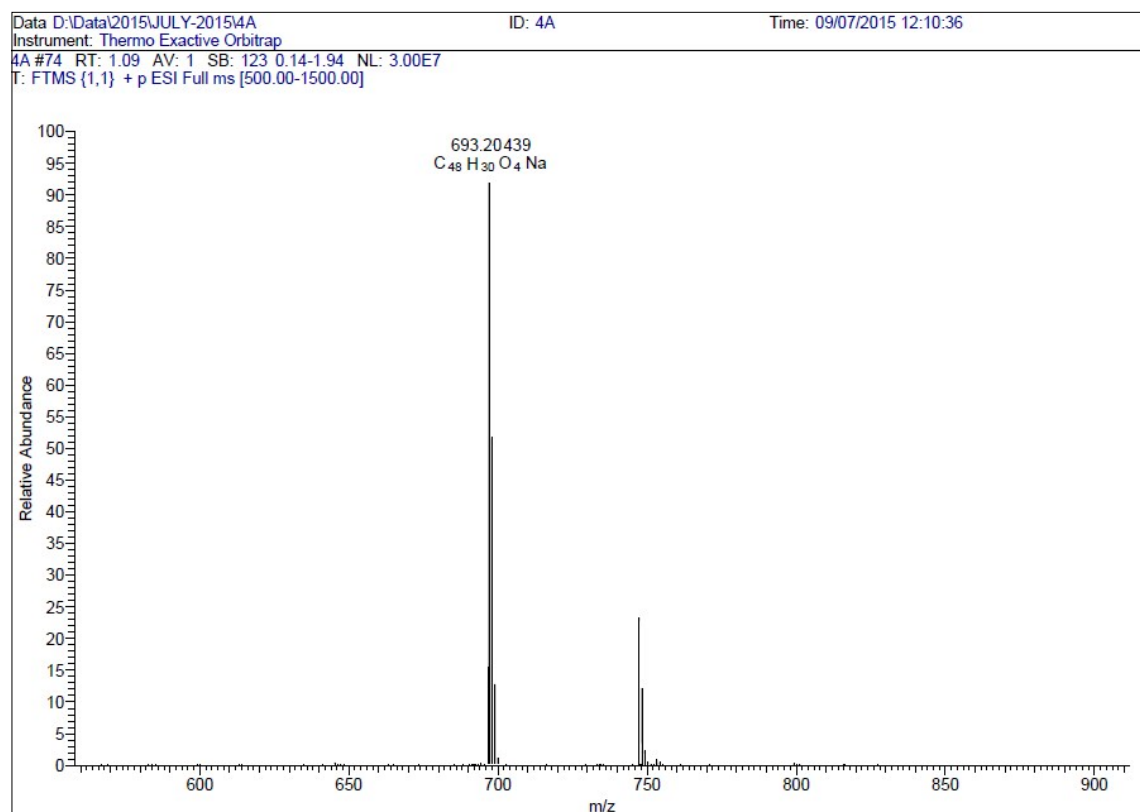

**Figure S62. Mass spectrum of 4a**

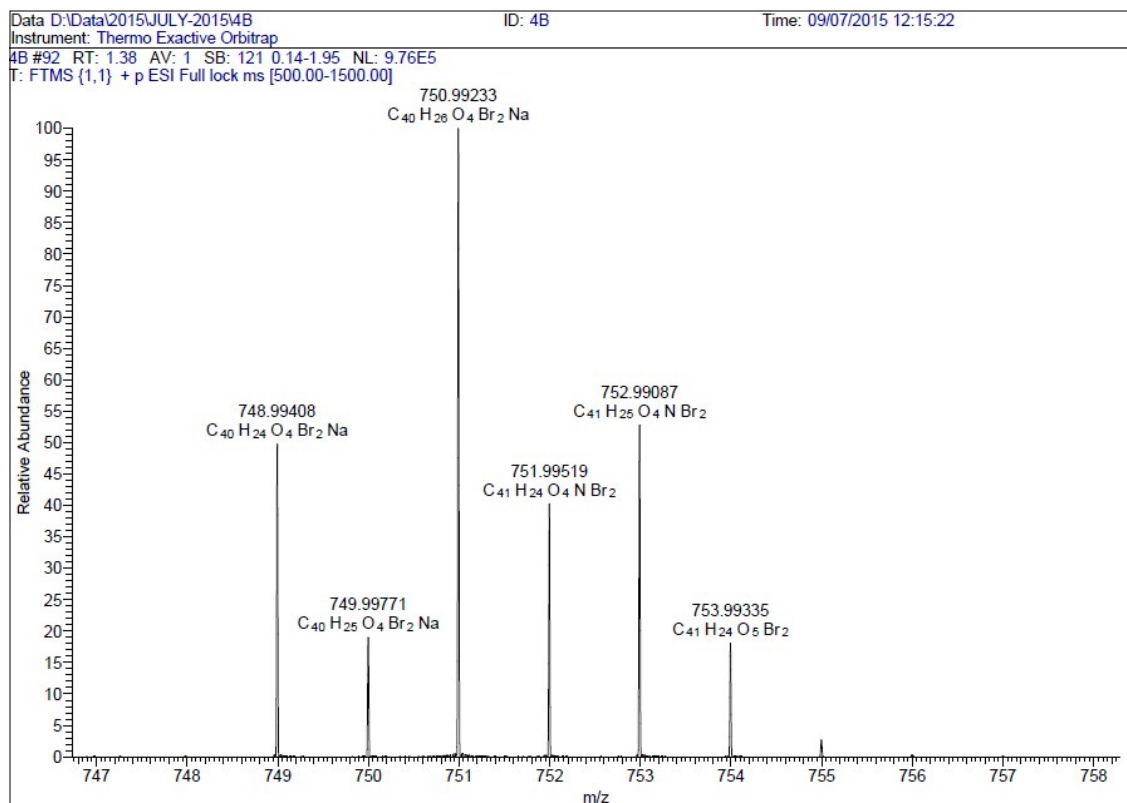

Figure S63. Mass spectrum of 4b

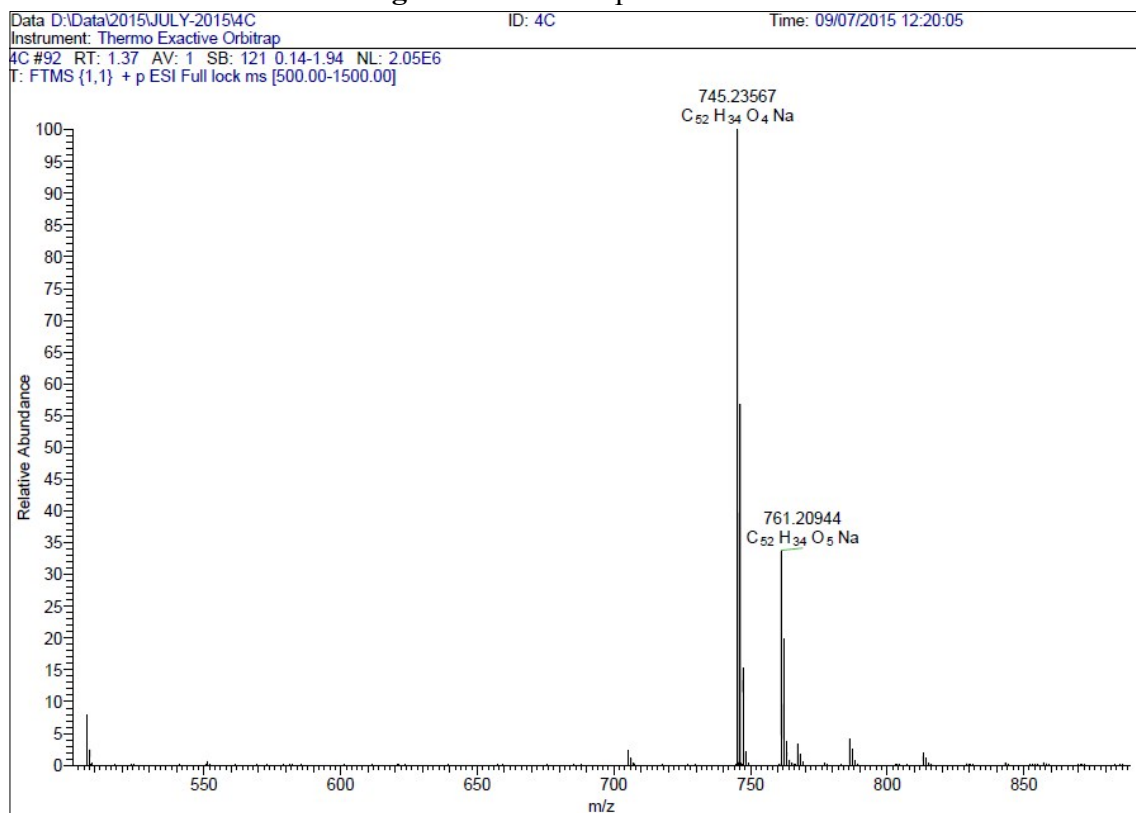

Figure S64. Mass spectrum of 4c

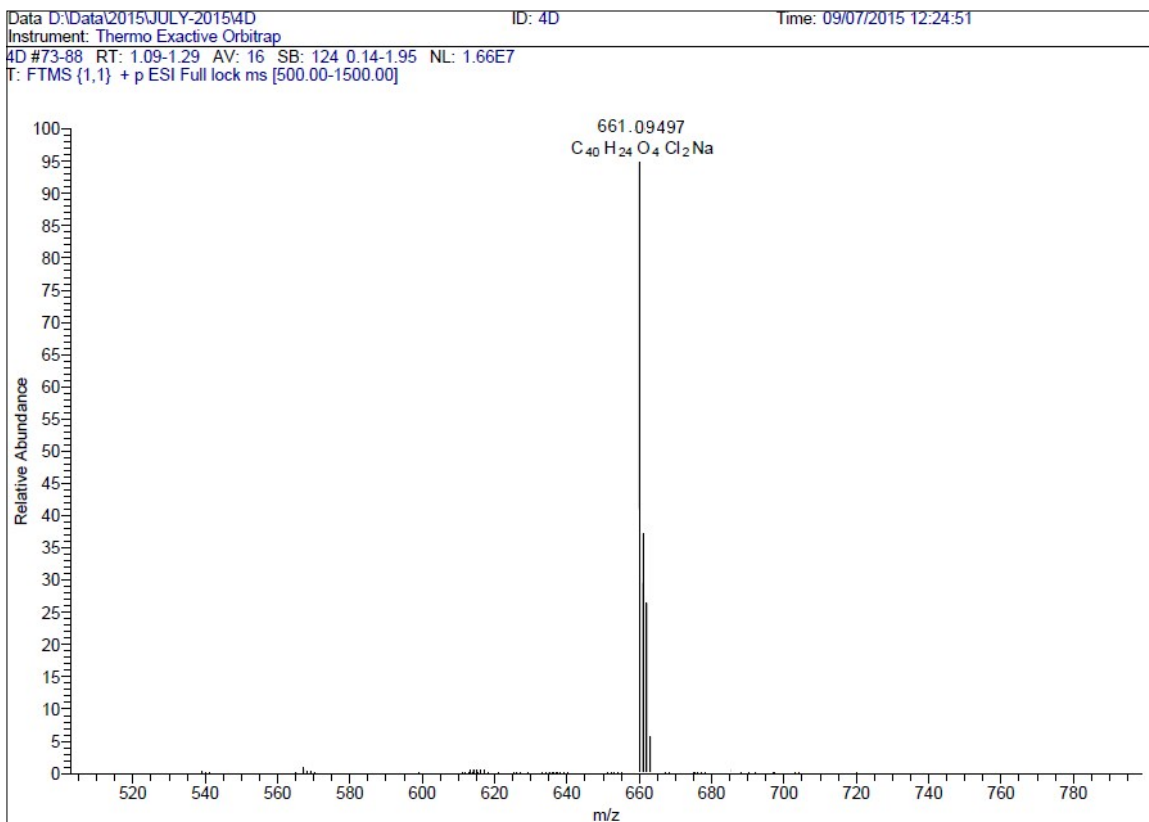

**Figure S65.** Mass spectrum of **4d**  
 Detecting the formation of intermediate **ii** (Scheme 2) through ESI MS method

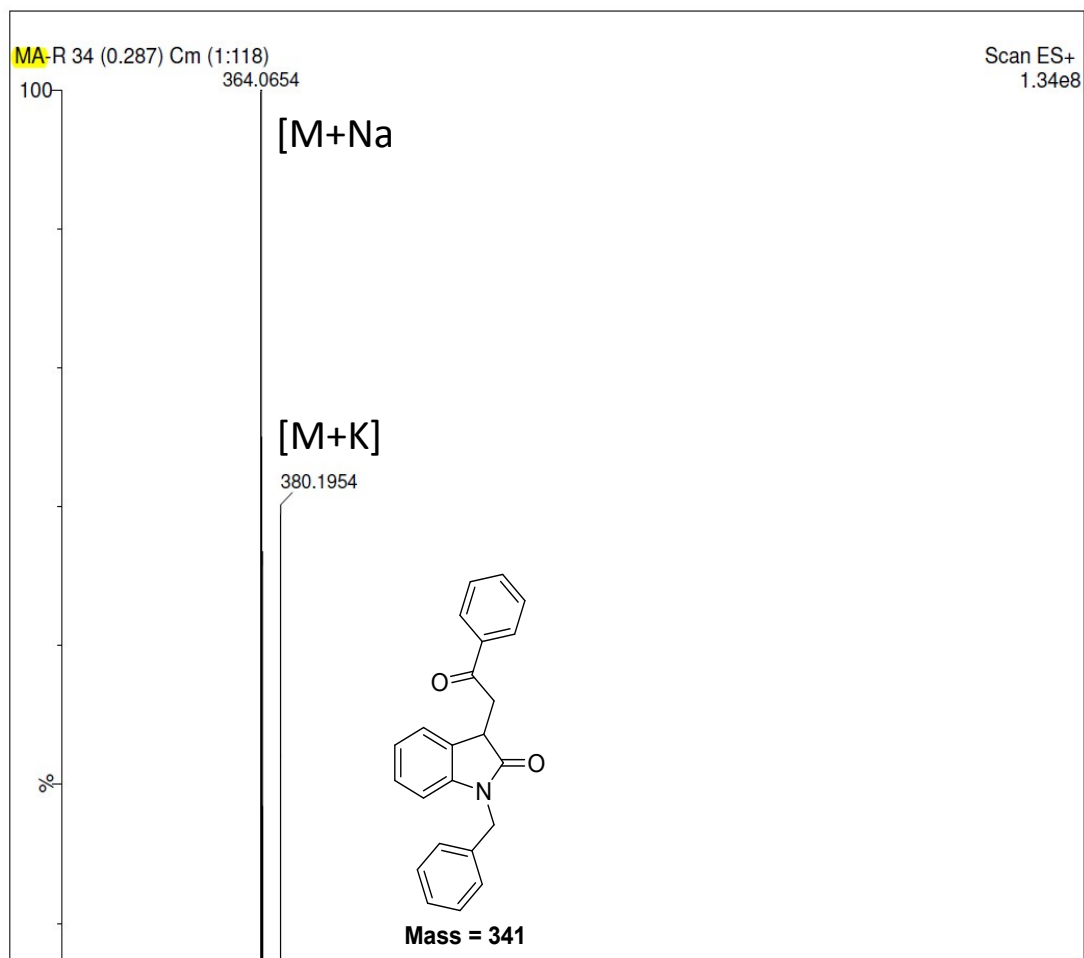

**Figure S66.** Mass spectrum of substrate **1a**

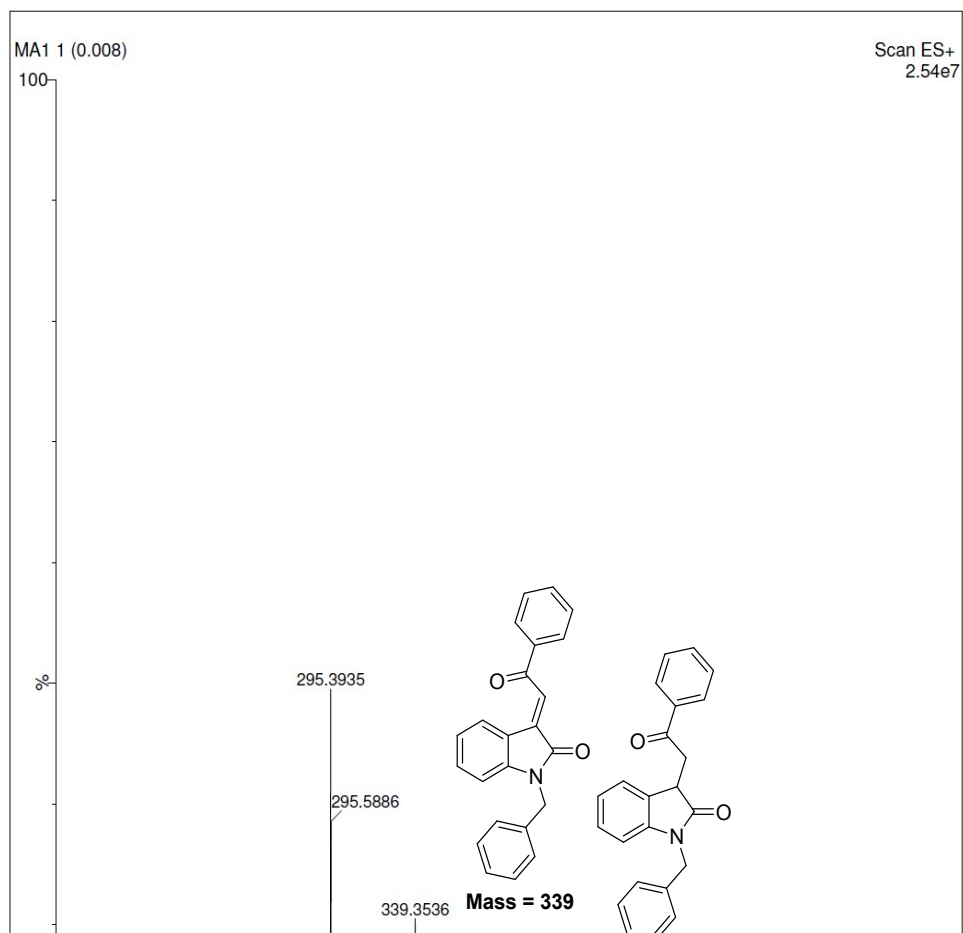



**Figure S68.** Mass spectrum of substrate **1a** and product **2a**

Spectrum was recorded using an aliquot withdrawn from the reaction after 5 h.

Annexure 1

-01-

Project Name protein  
Reported by User: Breeze user (Breeze)

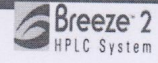

SAMPLE INFORMATION

Sample Name: KS2A  
Sample Type: Unknown  
Vial: 1  
Injection #: 1  
Injection Volume: 20.00 ul  
Run Time: 70.00 Minutes  
Acquired By: Breeze  
Date Acquired: 23-01-2017 17:52:36 IST  
Acq. Method: 161015  
Date Processed: 23-01-2017 18:50:51 IST  
Channel Name: 2998 Ch1 260nm@1.2nm  
Sample Set Name:

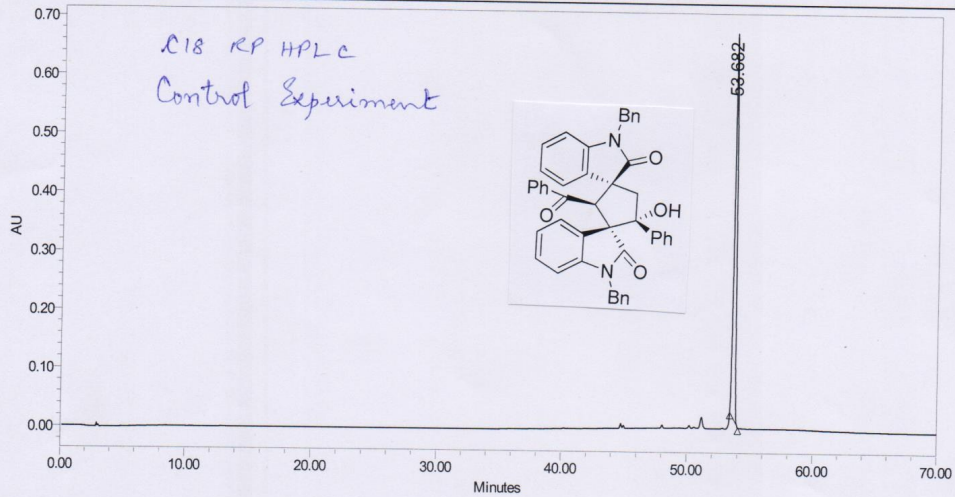

|   | RT (min) | Area (μV*sec) | % Area | Height (μV) | % Height |
|---|----------|---------------|--------|-------------|----------|
| 1 | 53.682   | 8605254       | 100.00 | 658150      | 100.00   |

Project Name: protein  
Reported by User: Breeze user (Breeze)

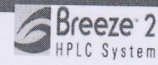

### SAMPLE INFORMATION

|                   |               |                  |                         |
|-------------------|---------------|------------------|-------------------------|
| Sample Name:      | ks1a          | Acquired By:     | Breeze                  |
| Sample Type:      | Unknown       | Date Acquired:   | 20-01-2017 14:24:43 IST |
| Vial:             | 1             | Acq. Method:     | 161015                  |
| Injection #:      | 1             | Date Processed:  | 20-01-2017 15:35:27 IST |
| Injection Volume: | 25.00 ul      | Channel Name:    | 2998 Ch1 260nm@1.2nm    |
| Run Time:         | 70.00 Minutes | Sample Set Name: |                         |

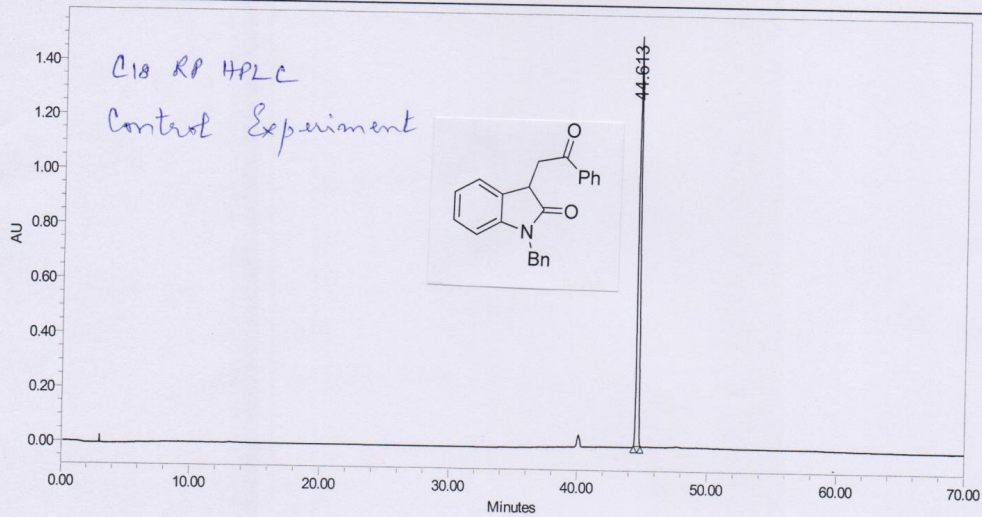

|   | RT (min) | Area (μV*sec) | % Area | Height (μV) | % Height |
|---|----------|---------------|--------|-------------|----------|
| 1 | 44.613   | 17136721      | 100.00 | 1502875     | 100.00   |



Project Name: protein  
Reported by User: Breeze user (Breeze)

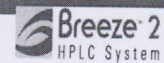

### SAMPLE INFORMATION

|                   |               |                  |                         |
|-------------------|---------------|------------------|-------------------------|
| Sample Name:      | 1;30 H KAUnk  | Acquired By:     | Breeze                  |
| Sample Type:      | Unknown       | Date Acquired:   | 23-01-2017 12:01:32 IST |
| Vial:             | 1             | Acq. Method:     | 161015                  |
| Injection #:      | 1             | Date Processed:  | 23-01-2017 12:46:46 IST |
| Injection Volume: | 20.00 ul      | Channel Name:    | 2998 Ch1 260nm@1.2nm    |
| Run Time:         | 70.00 Minutes | Sample Set Name: |                         |

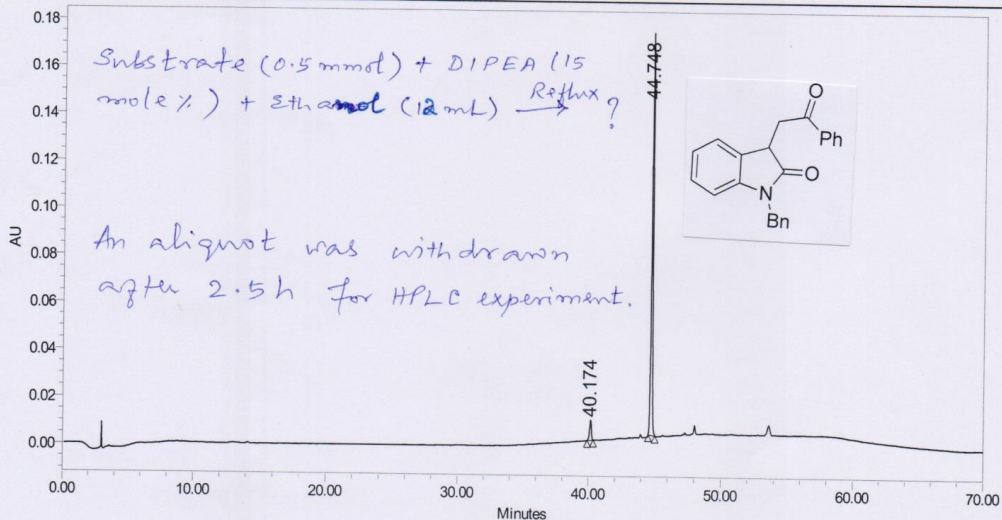

|   | RT (min) | Area ( $\mu\text{V}\cdot\text{sec}$ ) | % Area | Height ( $\mu\text{V}$ ) | % Height |
|---|----------|---------------------------------------|--------|--------------------------|----------|
| 1 | 40.174   | 75991                                 | 5.88   | 8426                     | 4.72     |
| 2 | 44.748   | 1215569                               | 94.12  | 170196                   | 95.28    |

-04-

Project Name: protein  
Reported by User: Breeze user (Breeze)

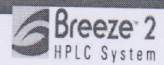

### SAMPLE INFORMATION

|                   |               |                  |                         |
|-------------------|---------------|------------------|-------------------------|
| Sample Name:      | 4H KSA        | Acquired By:     | Breeze                  |
| Sample Type:      | Unknown       | Date Acquired:   | 23-01-2017 15:03:52 IST |
| Vial:             | 1             | Acq. Method:     | 161015                  |
| Injection #:      | 1             | Date Processed:  | 23-01-2017 16:14:14 IST |
| Injection Volume: | 20.00 ul      | Channel Name:    | 2998 Ch1 260nm@1.2nm    |
| Run Time:         | 70.00 Minutes | Sample Set Name: |                         |

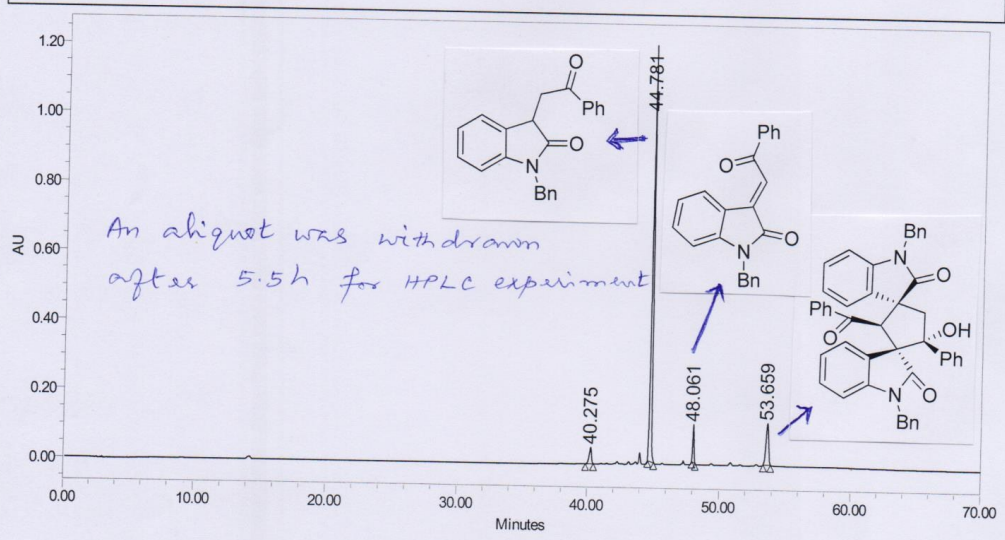

|   | RT (min) | Area (μV*sec) | % Area | Height (μV) | % Height |
|---|----------|---------------|--------|-------------|----------|
| 1 | 40.275   | 573823        | 4.74   | 47160       | 3.19     |
| 2 | 44.781   | 9164815       | 75.74  | 1203186     | 81.34    |
| 3 | 48.061   | 708291        | 5.85   | 108791      | 7.35     |
| 4 | 53.659   | 1653464       | 13.66  | 120130      | 8.12     |

Report Method: Untitled  
Page: 1 of 1

Printed: 23-01-2017  
16:15:02 Asia/Calcutta



-05-

Project Name: protein  
Reported by User: Breeze user (Breeze)

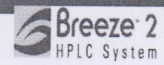

### SAMPLE INFORMATION

|                   |               |                  |                         |
|-------------------|---------------|------------------|-------------------------|
| Sample Name:      | KS 2A 9PM     | Acquired By:     | Breeze                  |
| Sample Type:      | Unknown       | Date Acquired:   | 23-01-2017 21:01:42 IST |
| Vial:             | 1             | Acq. Method:     | 161015                  |
| Injection #:      | 1             | Date Processed:  | 23-01-2017 22:11:01 IST |
| Injection Volume: | 20.00 ul      | Channel Name:    | 2998 Ch1 260nm@1.2nm    |
| Run Time:         | 70.00 Minutes | Sample Set Name: |                         |

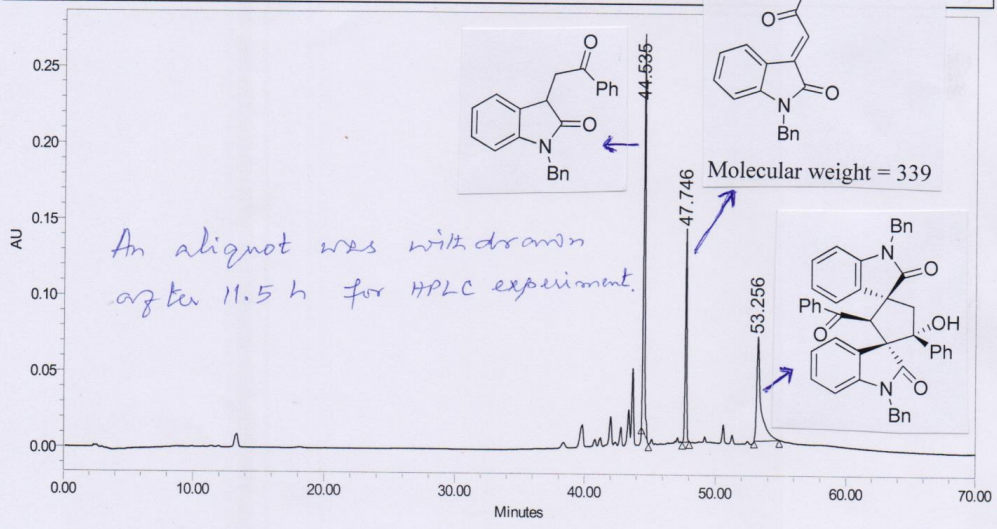

|   | RT (min) | Area (μV*sec) | % Area | Height (μV) | % Height |
|---|----------|---------------|--------|-------------|----------|
| 1 | 44.535   | 2141854       | 45.57  | 260817      | 55.67    |
| 2 | 47.746   | 998694        | 21.25  | 139660      | 29.81    |
| 3 | 53.256   | 1559129       | 33.18  | 68032       | 14.52    |

Report Method: Untitled  
Page: 1 of 1

Printed: 23-01-2017  
22:12:43 Asia/Calcutta

-06-

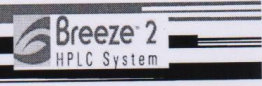

### SAMPLE INFORMATION

|                   |               |                  |                         |
|-------------------|---------------|------------------|-------------------------|
| Sample Name:      | ks 2a ppt     | Acquired By:     | Breeze                  |
| Sample Type:      | Unknown       | Date Acquired:   | 25-01-2017 15:50:38 IST |
| Vial:             | 1             | Acq. Method:     | 161015                  |
| Injection #:      | 1             | Date Processed:  | 25-01-2017 16:47:27 IST |
| Injection Volume: | 10.00 ul      | Channel Name:    | 2998 Ch1 260nm@1.2nm    |
| Run Time:         | 70.00 Minutes | Sample Set Name: |                         |

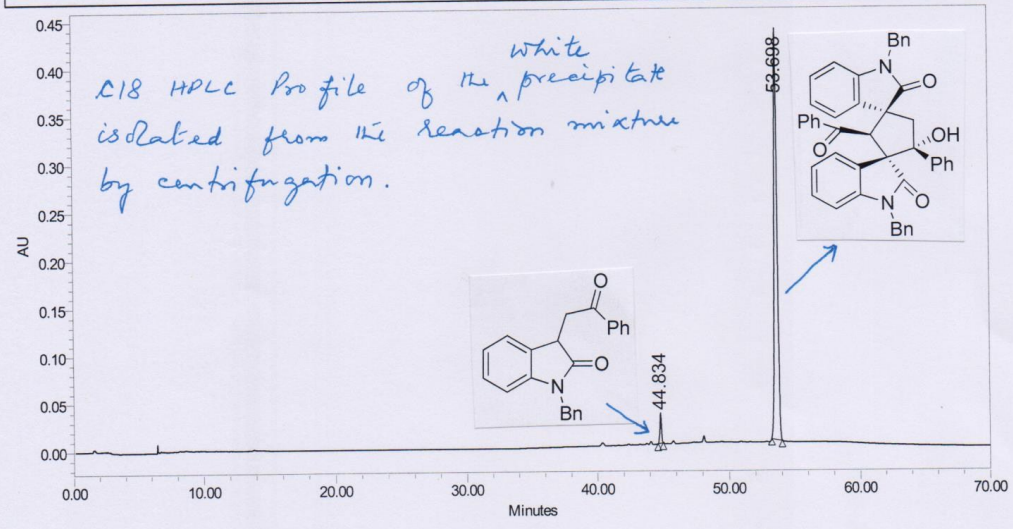

|   | RT (min) | Area (μV*sec) | % Area | Height (μV) | % Height |
|---|----------|---------------|--------|-------------|----------|
| 1 | 44.834   | 262634        | 3.63   | 31395       | 6.81     |
| 2 | 53.698   | 6965645       | 96.37  | 429357      | 93.19    |

2AD-KS48Y 76 (0.643) Sm (Mn, 10x1.00); Cm (8:119)  
340.2166

MS2 ES+  
7.73e5

[M+1] Peak

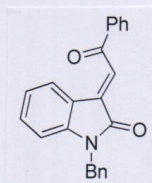

ESI-MS Profile of the HPLC fraction  
collected at ~48 minute

Sample: An aliquot withdrawn  
after 5.5 h

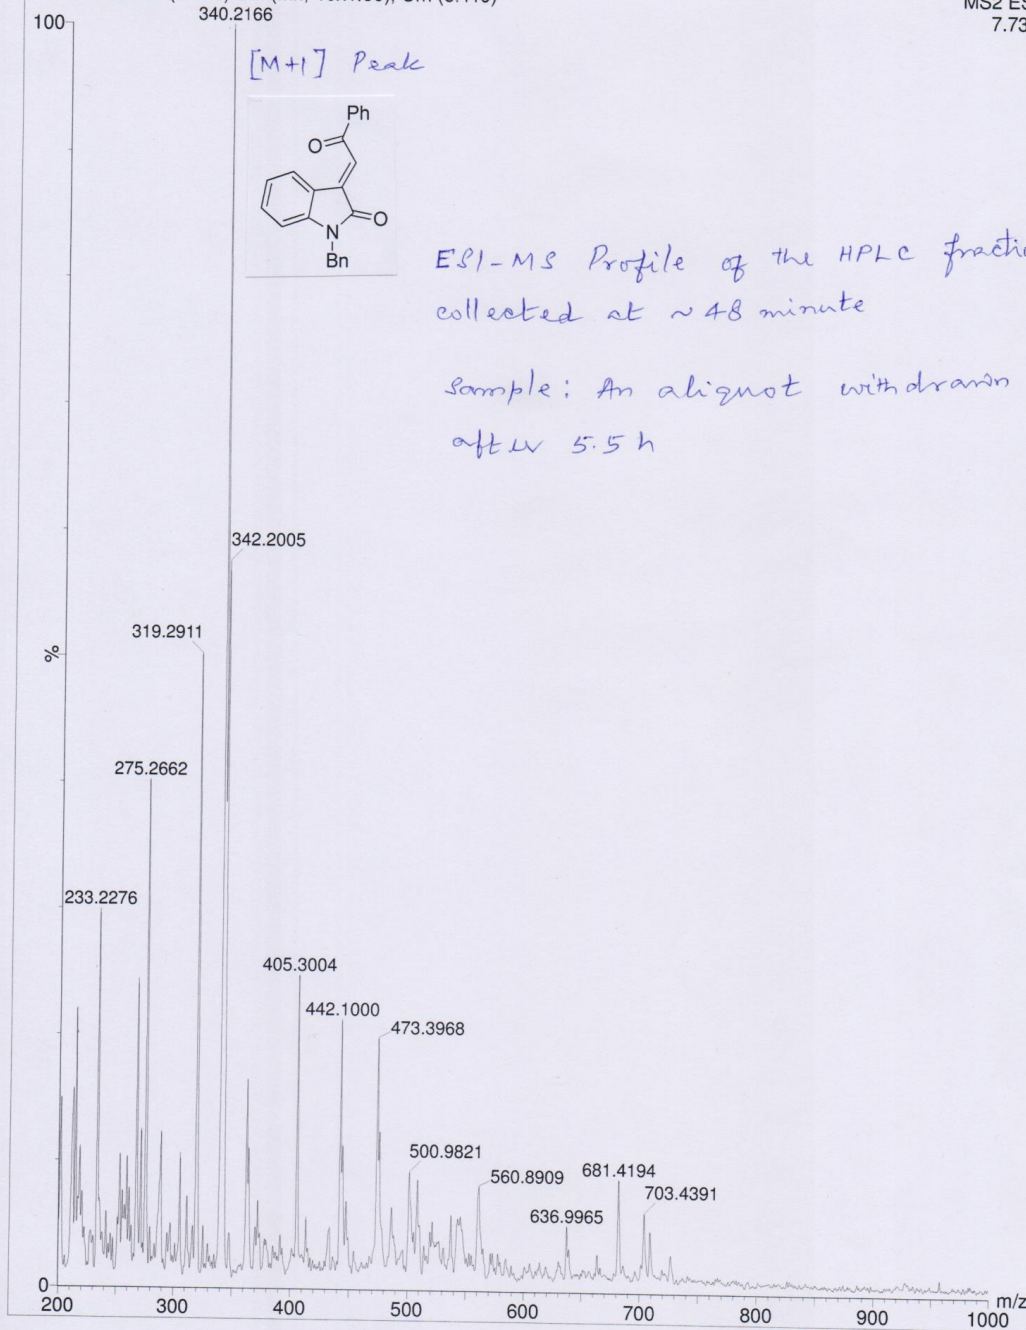



2AD-KS4OT 110 (0.930) Cm (8:117)  
319.2911

MS2 ES+  
4.97e6

ESI-MS Profile of the fraction  
collected at ~40 minute

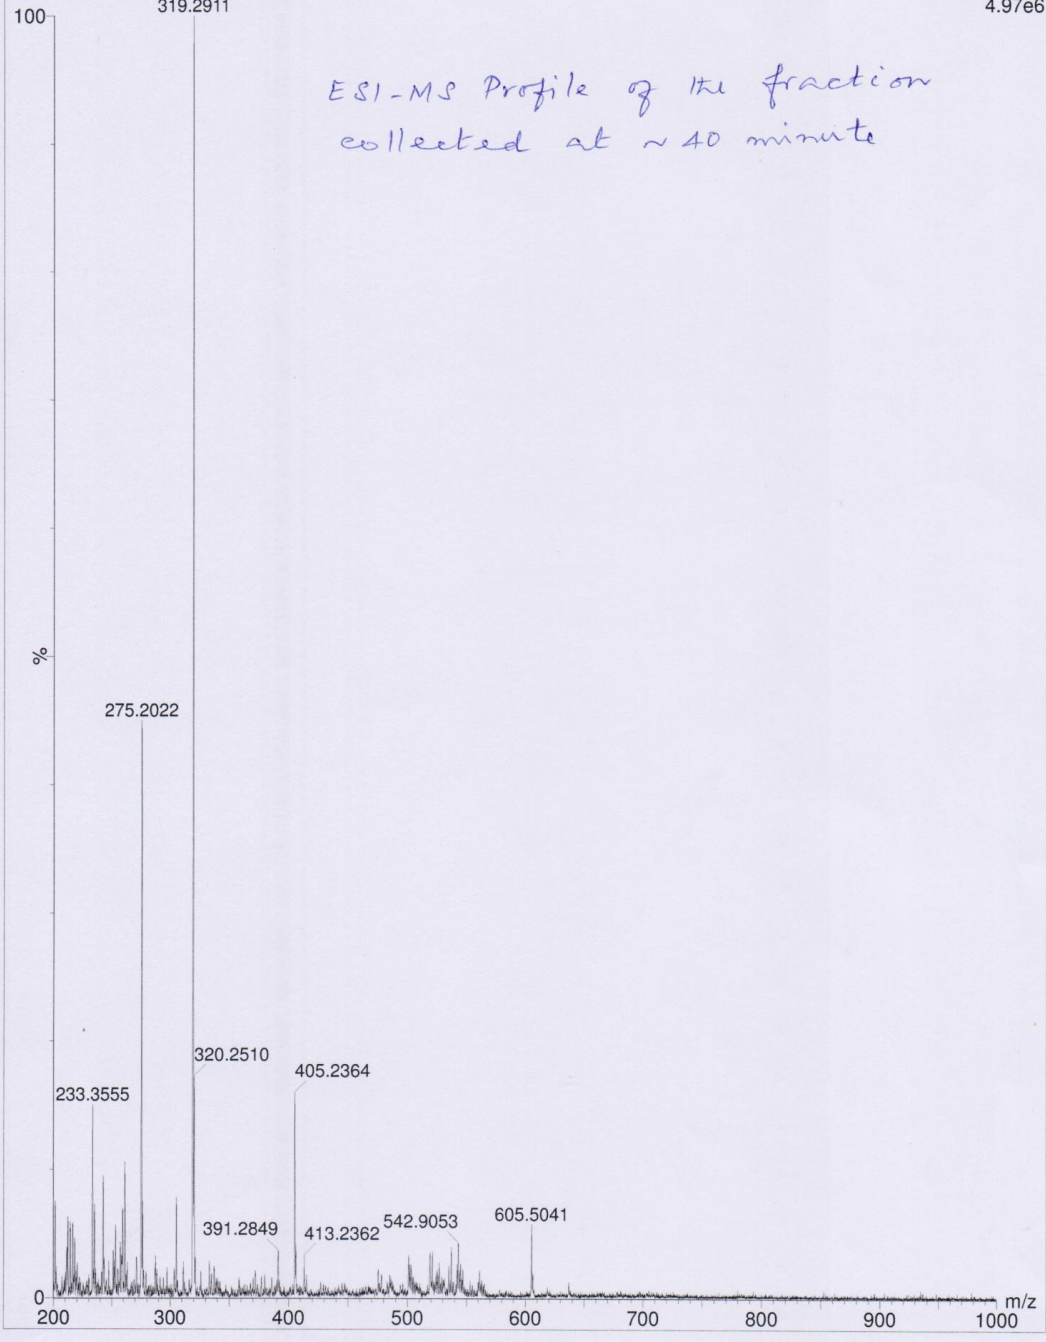



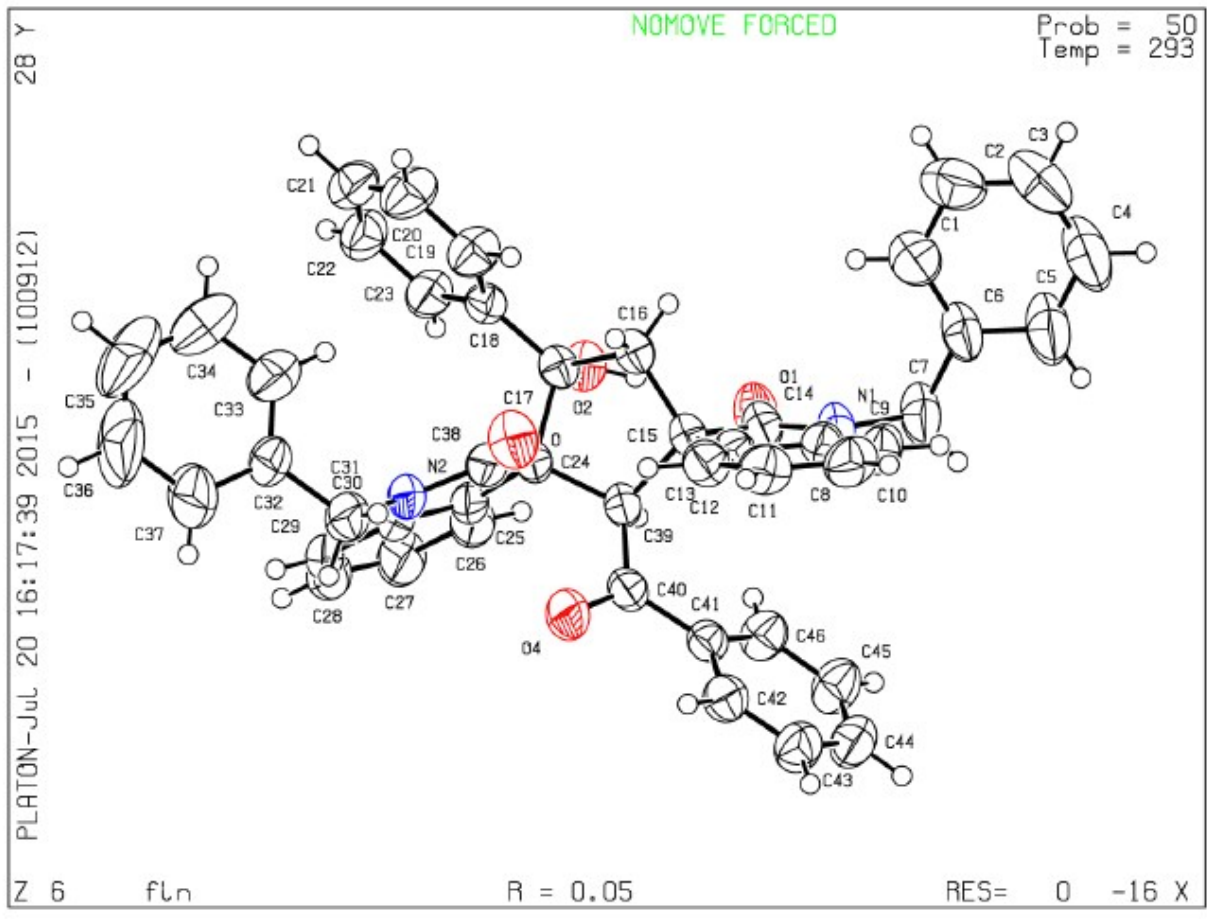

Supplement: c6ob02607a1.pdf [file c6ob02607a1.pdf]
